# Supplementary material for: Exploring the potential impact of the proposed UK TV and online food advertising regulations: a concept mapping study
Source: PubMed Central journal article supplement (PMC9207937; doi:10.1136/bmjopen-2021-060302), 2022-06-16
Supplement: bmjopen-2021-060302.draft_revisions.pdf [file bmjopen-2021-060302.draft_revisions.pdf]

# BMJ Open

BMJ Open is committed to open peer review. As part of this commitment we make the peer review history of every article we publish publicly available.

When an article is published we post the peer reviewers' comments and the authors' responses online. We also post the versions of the paper that were used during peer review. These are the versions that the peer review comments apply to.

The versions of the paper that follow are the versions that were submitted during the peer review process. They are not the versions of record or the final published versions. They should not be cited or distributed as the published version of this manuscript.

BMJ Open is an open access journal and the full, final, typeset and author-corrected version of record of the manuscript is available on our site with no access controls, subscription charges or pay-per-view fees (<http://bmjopen.bmj.com>).

If you have any questions on BMJ Open's open peer review process please email [info.bmjopen@bmj.com](mailto:info.bmjopen@bmj.com)

# BMJ Open

## Exploring the potential impact of the proposed UK TV and online food advertising regulations: a concept mapping study

|                               |                                                                                                                                                                                                                                                                                                                                                                                                                                        |
|-------------------------------|----------------------------------------------------------------------------------------------------------------------------------------------------------------------------------------------------------------------------------------------------------------------------------------------------------------------------------------------------------------------------------------------------------------------------------------|
| Journal:                      | <i>BMJ Open</i>                                                                                                                                                                                                                                                                                                                                                                                                                        |
| Manuscript ID                 | bmjopen-2021-060302                                                                                                                                                                                                                                                                                                                                                                                                                    |
| Article Type:                 | Original research                                                                                                                                                                                                                                                                                                                                                                                                                      |
| Date Submitted by the Author: | 17-Dec-2021                                                                                                                                                                                                                                                                                                                                                                                                                            |
| Complete List of Authors:     | Forde, Hannah; MRC Epidemiology Unit<br>Boyland, Emma; University of Liverpool Institute of Population Health, Department of Psychology<br>Scarborough, Peter; University of Oxford, Nuffield Department of Population Health; NIHR Oxford Biomedical Research Centre<br>Smith, Richard ; University of Exeter Medical School, Institute of Health Research<br>White, Martin; MRC Epidemiology Unit<br>Adams, J; MRC Epidemiology Unit |
| Keywords:                     | PUBLIC HEALTH, NUTRITION & DIETETICS, QUALITATIVE RESEARCH                                                                                                                                                                                                                                                                                                                                                                             |
|                               |                                                                                                                                                                                                                                                                                                                                                                                                                                        |

SCHOLARONE™  
Manuscripts

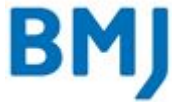

I, the Submitting Author has the right to grant and does grant on behalf of all authors of the Work (as defined in the below author licence), an exclusive licence and/or a non-exclusive licence for contributions from authors who are: i) UK Crown employees; ii) where BMJ has agreed a CC-BY licence shall apply, and/or iii) in accordance with the terms applicable for US Federal Government officers or employees acting as part of their official duties; on a worldwide, perpetual, irrevocable, royalty-free basis to BMJ Publishing Group Ltd ("BMJ") its licensees and where the relevant Journal is co-owned by BMJ to the co-owners of the Journal, to publish the Work in this journal and any other BMJ products and to exploit all rights, as set out in our [licence](#).

The Submitting Author accepts and understands that any supply made under these terms is made by BMJ to the Submitting Author unless you are acting as an employee on behalf of your employer or a postgraduate student of an affiliated institution which is paying any applicable article publishing charge ("APC") for Open Access articles. Where the Submitting Author wishes to make the Work available on an Open Access basis (and intends to pay the relevant APC), the terms of reuse of such Open Access shall be governed by a Creative Commons licence – details of these licences and which [Creative Commons](#) licence will apply to this Work are set out in our licence referred to above.

Other than as permitted in any relevant BMJ Author's Self Archiving Policies, I confirm this Work has not been accepted for publication elsewhere, is not being considered for publication elsewhere and does not duplicate material already published. I confirm all authors consent to publication of this Work and authorise the granting of this licence.

1  
2  
3  
4 1 **Exploring the potential impact of the proposed UK TV and online food**  
5  
6 2 **advertising regulations: a concept mapping study**  
7

8 3 **Hannah Forde<sup>a\*</sup>, Emma Boyland<sup>b</sup>, Peter Scarborough<sup>c,d</sup>, Richard Smith<sup>e</sup>, Martin White<sup>a</sup>, Jean Adams<sup>a</sup>**  
9

10 4 <sup>a</sup> MRC Epidemiology Unit, University of Cambridge School of Clinical Medicine, Box 285 Institute of  
11  
12 5 Metabolic Science, Cambridge Biomedical Campus, Cambridge, CB2 0QQ  
13

14 6 <sup>b</sup> Department of Psychology, Institute of Population Health, University of Liverpool, Eleanor Rathbone  
15  
16 7 Building, Bedford Street South, Liverpool, L69 7ZA  
17

18 8 <sup>c</sup> Nuffield Department of Population Health, University of Oxford, Old Road Campus, Roosevelt Drive,  
19  
20 9 Headington, Oxford, OX3 7LF  
21

22 10 <sup>d</sup> NIHR Oxford Biomedical Research Centre, The Joint Research Office, Second Floor, OUH Cowley  
23  
24 11 Unipart House Business Centre, Garsington Road, Oxford, OX4 2PG  
25

26 12 <sup>e</sup> Medical School Building, College of Medicine and Health, University of Exeter, St Luke's Campus,  
27  
28 13 Heavitree Road, Exeter, EX1 2LU  
29

30 14 \*Correspondence to Hannah Forde: [hf332@medschl.cam.ac.uk](mailto:hf332@medschl.cam.ac.uk)  
31

32  
33 15 **MAIN MANUSCRIPT WORD COUNT: 4623**  
34  
35  
36  
37  
38  
39  
40  
41  
42  
43  
44  
45  
46  
47  
48  
49  
50  
51  
52  
53  
54  
55  
56  
57  
58  
59  
60

## 16 ABSTRACT

17 **Objectives** In July 2020 the UK Government announced an intention to restrict advertisements for  
18 products high in fat, salt and sugar on live broadcast, catch-up and on-demand television before 9pm;  
19 and paid for online advertising. As no other jurisdiction has implemented similar regulations, there is  
20 no empirical evidence about how they might perturb the food system. To guide the regulations'  
21 implementation and evaluation, we aimed to develop a concept map to hypothesise their potential  
22 consequences for the commercial food system, health and society.

23 **Methods** We used adapted group concept mapping in four workshops virtually with food marketing  
24 and regulation experts across academia, civil society, government organisations, and industry (N=14),  
25 supported by Miro software. We merged concepts derived from the four workshops to develop a  
26 master map and then invited feedback from participants via email to generate a final concept map.

27 **Results** The concept map shows how the reactions of stakeholders to the regulations may reinforce  
28 or undermine the impact on the commercial food system, health and society.

29 **Conclusions** We use the concept map to illustrate pathways in three potential scenarios: (i)  
30 adaptations are made to the regulations in ways that reinforce positive impacts on public health; (ii)  
31 adaptations are made to the regulations in ways that undermine impacts on public health; and (iii)  
32 technicalities of the regulations cover too few unhealthy food products and advertising opportunities  
33 to make a substantial difference to public health.

34 Prior to the regulations' initial implementation or subsequent iterations, they could be altered to  
35 maximise the potential for reinforcing adaptations, minimise the potential for undermining  
36 adaptations, and ensure they cover a wide range of advertising opportunities and foods. The concept  
37 map will also inform the design of an evaluation of the regulations and could be used to inform the  
38 design and evaluation of similar regulations elsewhere.

## 39 STRENGTHS AND LIMITATIONS OF THIS STUDY

- 40 • By including a diverse range of experts, we developed the first comprehensive articulation of  
41 the potential pathways through which new advertising regulations may impact on the  
42 commercial food system, health and society.
- 43 • Holding the workshops online may have facilitated greater attendance, particularly as we  
44 employed techniques to minimise the limitations of online data collection.
- 45 • Timing the workshops after sufficient details are known about the regulations allowed for a  
46 meaningful discussion about their impact but with enough time for the study's findings to feed  
47 into the regulations' design.

- 1  
2  
3 48 • Though we did not aim to achieve saturation in this study, we found it difficult to recruit  
4 participants from industry.  
5 49  
6 50 • We necessarily invited more individuals than those who ultimately participated, which may  
7 affect the transferability of the study's findings.  
8 51  
9  
10  
11  
12  
13  
14  
15  
16  
17  
18  
19  
20  
21  
22  
23  
24  
25  
26  
27  
28  
29  
30  
31  
32  
33  
34  
35  
36  
37  
38  
39  
40  
41  
42  
43  
44  
45  
46  
47  
48  
49  
50  
51  
52  
53  
54  
55  
56  
57  
58  
59  
60
- Though we did not aim to achieve saturation in this study, we found it difficult to recruit participants from industry.
  - We necessarily invited more individuals than those who ultimately participated, which may affect the transferability of the study's findings.

For peer review only

## 52 INTRODUCTION

53 The World Health Organization (WHO) recommends that member states limit children's exposure to  
54 marketing for less healthy foods.[1] The recommendation reflects evidence that marketing influences  
55 food preferences and consumption, both at an individual (micro-level impacts)[2,3] and societal level  
56 (macro-level impacts).[4] Marketing has been defined as "the activity, set of institutions, and  
57 processes for creating, communicating, delivering, and exchanging offerings that have value for  
58 customers, clients, partners, and society at large".[5] Marketing is exerted through a range of  
59 activities, including those related to the product, its place, price and promotion.[6] Promotion includes  
60 building games around products (advergaming), social media 'influencers', and paid for advertising in  
61 any medium. Products high in fat, salt, or sugar (HFSS) are disproportionately advertised in the UK,  
62 with only 2.5% of total food and soft drink advertising spend going towards fruit and vegetables in  
63 2020.[7] Though the causal pathways between advertising and obesity are likely to be complex,[8] it  
64 is estimated that 6.4% (95% confidence interval (CI): 2.0-13.8) of UK childhood obesity and 5.0% (95%  
65 CI: 1.5-10.9) of overweight is attributable to HFSS television advertising alone.[9]

66 To address concerns about the prevalence of childhood obesity, in July 2020 the United Kingdom's  
67 (UK) Government Department of Health and Social Care published an intention to restrict  
68 advertisements for HFSS food and drink products on live broadcast, catch-up and on-demand  
69 television ('TV') before 9pm and paid for online advertising ('online').[10] Current details of these  
70 proposed regulations are summarised in **Box 1**, and though they have passed through the House of  
71 Lords in the Health and Care Bill,[11] details of the regulations may change before they receive Royal  
72 Assent and are implemented.

73 INSERT BOX 1 HERE

74 The TV and online regulations proposed for the UK will be some of the most restrictive worldwide,  
75 and the first to explicitly address paid for online advertising.[12] Overall, 18% of UK advertising spend  
76 is for TV slots and at least 63% for online slots.[13] Though there has been a recent decline in broadcast  
77 TV viewing in the UK, average viewing time remains around three hours per day for ages 4 years and  
78 above.[13] The Covid-19 pandemic has accelerated use of subscription video-on-demand services,  
79 with viewing of services such as Netflix and Amazon Prime Video almost doubling in 2020 to an  
80 estimated 1 hour per person per day.[14] Such services would be covered by the proposed online  
81 regulation rather than the TV one. While the decline in broadcast TV viewing has been more  
82 pronounced among younger people (for 16-24 year olds down 18%, and for children 4-15 year olds  
83 down 16% in 2019),[13] this has corresponded with an increase in viewing of subscription video-on-  
84 demand services among younger people (by 55 minutes to an average of two hours per day between

1  
2  
3 85 April 2019 and April 2020).[14] It has been estimated that a pre-9pm ban on HFSS TV food advertising  
4 86 would result in a 4.6 (1.4-9.5)% reduction in childhood obesity and a 3.6 (1.1-7.4)% reduction in  
5 87 childhood overweight prevalence.[9] Effects were two-fold greater in the least compared to the most  
6 88 affluent social groups and would likely be amplified by comparable restrictions on online food  
7 89 promotion.[9] The ultimate results of such a regulation were predicted to depend on how HFSS  
8 90 advertising patterns change in response.[9]

91 Few evaluations of such food advertising restrictions have been conducted worldwide,[12] partly  
92 because there have been few comparable regulations. There are also challenges to evaluating this  
93 type of intervention that is delivered to whole populations and so is impractical to subject to  
94 experimental evaluation techniques such as randomised controlled trials.[15] Furthermore, the  
95 commercial food sector exhibits characteristics of a complex adaptive system.[16] Adaptations made  
96 by stakeholders residing in the system that is regulated may lead to both intended and unintended  
97 consequences that ultimately impact on the overall effectiveness of regulations.[16] The 'balloon  
98 effect' proposes that restrictions on one type of marketing can lead to increases in others,[17] as  
99 companies and other aspects of the food system adapt. Articulating these possible adaptations and  
100 their potential consequences should help refine details of the regulations before implementation.  
101 Understanding possible adaptations and consequences should also help inform the design of any  
102 evaluation.

103 To maximise the applicability of evaluation findings to policymakers outside of the UK, it is helpful for  
104 evaluators to test theories as well as evaluate interventions.[18] Theory-driven evaluation first  
105 requires the development and clear articulation of program theory.[19] Concept mapping is an  
106 approach particularly useful for public health researchers interested in developing theory.[20] A  
107 concept map is a "diagram of proposed relationships among a set of concepts....about a particular  
108 question....or topic".[21] Concept maps can be used to help organise ideas, demarcate an area of  
109 interest and plan evaluations. Group concept mapping is a structured approach involving group work  
110 that is flexible to many public health contexts.[22]

## 111 **Objectives**

112 In this study, we used an approach inspired by group concept mapping to develop a concept map of  
113 how the new TV and online advertising regulations may impact on the commercial food system, health  
114 and society. We aimed to describe how the regulations may interact with the food system so that  
115 evaluations of the regulations can be grounded in clearly articulated theory, and so that adaptations  
116 to the regulations that could improve the health impact can be identified before implementation.



## 117 **METHODS**

### 118 **Study design**

119 We created a concept map of the potential pathways through which the regulations may impact on  
120 the commercial food system, health and society. By 'food system' we mean the interdependent  
121 network of entities involved in agriculture and fisheries, food processing and production, storage and  
122 distribution, wholesaling and retailing, and preparation and marketing of raw, processed and ready to  
123 eat foods.[16] By 'society', we mean the wider social system in which the food system is embedded.  
124 We developed the map using an adapted version of a group concept mapping method in four  
125 workshops.[22] The study reporting adheres to the Consolidated Criteria for Reporting Qualitative  
126 Research (COREQ) (**Appendix 1**),[23] but recognises proposed amendments relating to gender.[24]

### 127 **Participant recruitment**

128 Workshop participants were recruited from academia, civil society, government organisations and  
129 industry (e.g., food industry, media, advertising). Individuals were eligible for inclusion if they had  
130 professional knowledge and experience of food marketing regulation within their sector and were  
131 based in the UK. We identified individuals from our existing contacts in these sectors and by searching  
132 the websites of relevant organisations. Individuals were invited by email to take part in the study. We  
133 aimed to recruit up to 20 individuals, approximately evenly distributed across the participant groups.  
134 As we were not aiming to reach 'saturation',[25] we decided on the number of people to recruit to  
135 the study pragmatically, based on the resources available to us but allowing for sufficient breadth.

136 Participants from industry attended a separate workshop to those from academia, civil society and  
137 government organisations due to the potential for conflicts of interests between sectors. We set a  
138 limit of 10 participants per workshop in addition to the facilitators (JA and HF, who both had qualitative  
139 research experience, e.g., [26,27]), which is considered a manageable total number of participants to  
140 permit dialogue and engagement.[22] Workshops were arranged around participants' availability in  
141 July and August 2021 and lasted 2 hours each.

### 142 **Data collection**

143 Building on previous work that has used group concept mapping to inform the design of evaluations  
144 of population health interventions,[28] we used the first three steps of group concept mapping  
145 (preparation, generation and structuring)[22] and added a fourth (reflection). The first three steps  
146 were achieved in the workshops, and the final step was achieved using an online feedback form. We  
147 held the workshops on Zoom, an online videoconferencing software (<https://zoom.us/>) to minimise  
148 time demands on participants and as data collection took place during COVID-19 restrictions. In the

1  
2  
3 149 workshops, we used a combination of pre-piloted Microsoft PowerPoint slides and Miro software  
4  
5 150 (<https://miro.com/>) to provide instructions to participants and visualise their contributions as they  
6  
7 151 were made, respectively. Our data consisted of screenshots of maps as they developed, the map from  
8  
9 152 each workshop, audio recordings of the workshops, and post-workshop feedback returned through  
10  
11 153 an online form. Workshops were held under the Chatham House Rule[29]: participants were told they  
12  
13 154 could use the information discussed in the workshops, but they could not reveal the identity or  
14  
15 155 affiliation of other participants. **Figure 1** summarises the method used to develop the final concept  
16  
17 156 map.

17 157  
18  
19  
20  
21  
22  
23  
24  
25  
26  
27  
28  
29  
30  
31  
32  
33  
34  
35  
36  
37  
38  
39  
40  
41  
42  
43  
44  
45  
46  
47  
48  
49  
50  
51  
52  
53  
54  
55  
56  
57  
58  
59  
60

INSERT FIGURE 1 HERE

#### 158 Preparation

159 Preparation entailed setting out the aims and processes of the workshop and agreeing the focus area  
160 of the map.[22] At the beginning of each workshop, the workshop facilitators introduced the aims and  
161 processes. They reminded participants of the intervention details, the withdrawal process and that  
162 the workshops were being recorded. The facilitators proposed that the focus area was “what are the  
163 potential pathways through which the intervention might impact on health, the commercial food  
164 system and society?”. Participants were invited to help refine this during a discussion of approximately  
165 5 minutes.

#### 166 Generation

167 Generation is a divergent process where participants individually brainstorm a long list of responses  
168 to the focus area and consider the relative importance of each response.[22] Participants were given  
169 around 10 minutes to independently generate a list of as many responses as possible to the refined  
170 focus area, including pathways to both positive and negative impacts arising from the regulations.

#### 171 Structuring

172 Structuring is a convergent process where participants organise and critically reflect on ideas and  
173 relationships between concepts.[22] For approximately 60 minutes, participants were asked in turn  
174 to contribute responses to the focus area from their individual brainstorming in order of relative  
175 importance. These were structured and visualised in real-time using Miro, which was shared on-screen  
176 with participants, with new concepts and relationships added to a draft map as participants suggested  
177 them (see **Figure 2**). Once all responses were included, participants were invited to reflect on the map,  
178 adding additional concepts and relationships as required. We adopted an inclusive approach to adding  
179 concepts and relationships to maps, including everything mentioned and not deleting anything  
180 previously added.

1  
2  
3 181 INSERT FIGURE 2 HERE  
4

5 182 Reflection  
6

7  
8 183 After the workshops, we merged the map from each workshop into one 'master' map. We used a  
9  
10 184 method inspired by those employed in other mapping projects.[30] First, all concepts in the maps  
11  
12 185 were documented in a Microsoft Excel sheet, and similar or identical concepts across the maps were  
13  
14 186 grouped and refined into simplified concepts and accompanying descriptions. Second, these refined  
15  
16 187 concepts were mapped in a way that corresponded with pathways depicted in the four separate maps.  
17  
18 188 Concepts not immediately fitting anywhere were placed to the side for further deliberation.

19 189 We then circulated the master map to all workshop participants by email. The email contained a link  
20  
21 190 to an online form issued via REDCap (<https://www.project-redcap.org/>) that asked questions about  
22  
23 191 the map to seek suggested changes. We used the suggestions to produce a final concept map.

## 24 192 **Analysis**

25  
26 193 Beyond merging the maps from each workshop into a master map, no formal analyses were  
27  
28 194 conducted.

## 29 195 **Ethics**

30  
31 196 The study received favourable review from the University of Cambridge School of Humanities and  
32  
33 197 Social Science Research Ethics Committee in June 2021, reference number 21.276. Participants were  
34  
35 198 provided with an information sheet about the study and provided informed consent before joining a  
36  
37 199 workshop using an e-consent form issued via REDCap.

## 38 200 **Patient and public involvement**

39  
40  
41 201 Patients and/or the public were not involved in the design, conduct, reporting or dissemination plans  
42  
43 202 of this research.

## 44 203 **RESULTS**

45  
46  
47 204 From four workshops with a total of 14 participants, we developed a concept map to describe how  
48  
49 205 the proposed TV and online advertising regulations may impact on the commercial food system,  
50  
51 206 health and society. Here we present the concept map and describe its component concepts.  
52  
53  
54  
55  
56  
57  
58  
59  
60

## 207 Participant characteristics

208 We held four workshops: one with individuals from industry, and three with individuals from  
 209 academia, civil society, and government organisations (see **Table 1**). As the focus was on generating  
 210 the map as a group, we did not collate any demographic information about participants.[30]

211 **Table 1 Sectors included in each workshop**

| Participant sectors per workshop | Workshop 1 | Workshop 2 | Workshop 3 | Workshop 4         | Total |
|----------------------------------|------------|------------|------------|--------------------|-------|
| Academia                         | 2          | 1          | 1          | 0                  | 4     |
| Civil society                    | 2          | 1          | 3          | 0                  | 6     |
| Government organisation          | 0          | 1          | 1          | 0                  | 2     |
| Industry                         | 0          | 0          | 0          | 2                  | 2     |
|                                  |            |            |            | <b>Grand total</b> | 14    |

## 212 Concept map of anticipated adaptations to the regulations

213 The maps produced in each workshop are provided in **Appendix 2**, and they illustrate the nuance in  
 214 focus between workshops. For example, the workshop with industry participants focused more on the  
 215 technical difficulties presented by the regulations than in other workshops. The resultant conceptmap  
 216 is presented in **Figure 3**, and it depicts the possible pathways of change that could follow the  
 217 regulations. Colour coding is used to differentiate the groups of reactions to the regulations:  
 218 government, food and beverage companies, public, society and health. Pathways depicted are not  
 219 exhaustive, as it is possible that other links between concepts exist that were not captured in the  
 220 workshops. The map is also accompanied by a list of factors that may modify the impact of pathways  
 221 that it depicts, such as socioeconomic position and company size. The concepts contained in each  
 222 workshop map, and the corresponding concepts they were assigned in the final concept map, are  
 223 provided in **Appendix 3**. Concepts are described in more detail in **Table 2**.

224 INSERT FIGURE 3 HERE

225 **Table 2 Description of concepts in the concept map**

| Statement                            | Description                                                                                                                                                           |
|--------------------------------------|-----------------------------------------------------------------------------------------------------------------------------------------------------------------------|
| <b>Anticipation</b>                  | Food and drink companies foresee the introduction of the regulations <sup>a</sup> , and possibly other related legislation e.g., volume and location price promotion. |
| <b>Availability of HFSS products</b> | Availability of <i>all</i> HFSS foods and beverages, both within and outside the scope of the regulations <sup>a</sup> , in physical and online shops.                |
| <b>Bodyweight</b>                    | In terms of Body Mass Index (BMI), overweight or obesity status.                                                                                                      |

| Statement                                                  | Description                                                                                                                                                                                                                                                                                                                                                                                  |
|------------------------------------------------------------|----------------------------------------------------------------------------------------------------------------------------------------------------------------------------------------------------------------------------------------------------------------------------------------------------------------------------------------------------------------------------------------------|
| <b>Calorie consumption</b>                                 | Total energy intake of individuals.                                                                                                                                                                                                                                                                                                                                                          |
| <b>Child purchasing requests for HFSS products</b>         | Degree to which children make purchasing requests to caregivers for <u>all</u> HFSS products, both within and outside the scope of the regulations <sup>a</sup> .                                                                                                                                                                                                                            |
| <b>Commercial food system</b>                              | Interdependent networks of commercial entities involved in agriculture and fisheries, food processing and production, storage and distribution, wholesaling and retailing, and preparation and marketing of raw, processed, and ready to eat foods.[16]                                                                                                                                      |
| <b>Company engagement with health issues</b>               | Degree to which food and beverage companies orientate their business around public health goals.                                                                                                                                                                                                                                                                                             |
| <b>Company profitability</b>                               | A company's ability to make profit.                                                                                                                                                                                                                                                                                                                                                          |
| <b>Consumption of regulated HFSS products</b>              | Individual's intake of foods and beverages within the scope of the regulations <sup>a</sup> .                                                                                                                                                                                                                                                                                                |
| <b>Consumption of unregulated products</b>                 | Individual's intake of foods and beverages that are not within the scope of the regulations <sup>a</sup> .                                                                                                                                                                                                                                                                                   |
| <b>Definitions</b>                                         | Information used to define or enforce the regulation <sup>a</sup> , including the UK Nutrient Profiling Model and the food categories from the Sugar Reduction Strategy. Importantly, the regulations <sup>a</sup> cover a group of foods that is different from those covered by other UK dietary public health regulations. Enforcement is based on information provided by companies.     |
| <b>Demand for regulated HFSS products</b>                  | Public desire to purchase or consume foods and beverages within the scope of the regulations <sup>a</sup> .                                                                                                                                                                                                                                                                                  |
| <b>Demand for unregulated products</b>                     | Public desire to purchase or consume foods and beverages outside of the scope of the regulations <sup>a</sup> .                                                                                                                                                                                                                                                                              |
| <b>Digital surveillance</b>                                | Digital data collated by website to inform regulation <sup>a</sup> enforcement.                                                                                                                                                                                                                                                                                                              |
| <b>Employment</b>                                          | Number of people employed in the commercial food system.                                                                                                                                                                                                                                                                                                                                     |
| <b>Exposure to advertising for unregulated products</b>    | Adverts for products outside of the scope of the regulations. For foods and beverages, this could be HFSS products within companies' portfolios that are outside of the scope of the regulations, healthier products (e.g., fruit and vegetables), or food delivery companies. Also includes non-food and beverage products and services, but not clear what health impacts they might have. |
| <b>Exposure to advertising for regulated HFSS products</b> | Exposure to advertising for food and beverages within the scope of the regulations <sup>a</sup> .                                                                                                                                                                                                                                                                                            |

| Statement                                                 | Description                                                                                                                                                                                                                                                                                                                                                                                                                                                     |
|-----------------------------------------------------------|-----------------------------------------------------------------------------------------------------------------------------------------------------------------------------------------------------------------------------------------------------------------------------------------------------------------------------------------------------------------------------------------------------------------------------------------------------------------|
| <b>Exposure to unregulated marketing of HFSS products</b> | Exposure to advertising for <u>all</u> HFSS products on media that are outside of the scope of the regulations <sup>a</sup> . Includes offline advertising (e.g., print media), forms of marketing online that are exempt from the regulations (e.g., in owned media), sponsorship, brand advertising and creative modes of marketing that are hard to capture with regulation.                                                                                 |
| <b>Health</b>                                             | Overall health, including and beyond bodyweight and non-communicable diseases (NCDs).                                                                                                                                                                                                                                                                                                                                                                           |
| <b>Lobbying against further interventions</b>             | Activities undertaken by, or on behalf of, food and beverage companies to resist further policy or regulations.                                                                                                                                                                                                                                                                                                                                                 |
| <b>Market share</b>                                       | The size of the total market held by a company. Few companies that each hold a large market share creates a concentrated market.                                                                                                                                                                                                                                                                                                                                |
| <b>Portion size</b>                                       | Size of food and beverage products in grams or calories, or recommended portion size.                                                                                                                                                                                                                                                                                                                                                                           |
| <b>Price</b>                                              | Price of food and beverage products, including price discounts.                                                                                                                                                                                                                                                                                                                                                                                                 |
| <b>Product innovation for unregulated products</b>        | Developing new products that are outside of the scope of the regulations <sup>a</sup> , or reformulating existing products so they are no longer within the scope of the regulations. Could include reformulation using artificial ingredients or developing e.g., saltier products that are currently an exempt category. Some categories of products are easier to change than others, and some companies are better able to respond in this way than others. |
| <b>Public awareness</b>                                   | Degree of public awareness of both the regulations <sup>a</sup> and the problems they are trying to address.                                                                                                                                                                                                                                                                                                                                                    |
| <b>Public support</b>                                     | Degree of public support for the regulations <sup>a</sup> .                                                                                                                                                                                                                                                                                                                                                                                                     |
| <b>Purchases of regulated HFSS products</b>               | Sales (from company perspective) or purchases (from individual perspective) of food and beverage products within the scope of the regulations <sup>a</sup> .                                                                                                                                                                                                                                                                                                    |
| <b>Purchases of unregulated products</b>                  | Sales (from company perspective) or purchases (from individual perspective) of food and beverage products outside of the scope of the regulations <sup>a</sup> .                                                                                                                                                                                                                                                                                                |
| <b>Regulatory and political landscape</b>                 | Wider landscape of regulation and policy, including others relating to marketing (e.g., location and volume price regulations) and COVID-19. The degree to which the regulations <sup>a</sup> harmonise with the wider political and regulatory landscape.                                                                                                                                                                                                      |
| <b>Regulatory precedent</b>                               | Implementation of the regulations <sup>a</sup> serves as precedent for any future regulation.                                                                                                                                                                                                                                                                                                                                                                   |
| <b>Risk of diet-related NCDs</b>                          | Risk of developing NCDs influenced by dietary behaviours.                                                                                                                                                                                                                                                                                                                                                                                                       |
| <b>Social norms around food</b>                           | Implicit or explicit beliefs, attitudes, or behaviours about eating, at both an individual and family level.                                                                                                                                                                                                                                                                                                                                                    |

| Statement              | Description                                                                                                     |
|------------------------|-----------------------------------------------------------------------------------------------------------------|
| <b>Society</b>         | The wider social system in which the food system is embedded.                                                   |
| <b>Societal shifts</b> | Exposure to advertising effects social norms and may contribute to societal changes in consumerism and culture. |

226 Notes: BMI = body mass index; HFSS = high fat, salt, and sugar; NCD = Non-communicable disease.

227 <sup>a</sup>The regulations apply to online and TV advertising for a subset of HFSS products, defined by the  
 228 2004 to 2005 UK Nutrient Profiling Model and within particular categories from the Sugar Reduction  
 229 Strategy. This means there are HFSS products (unregulated HFSS) and non-HFSS products outside  
 230 of the scope of the regulations.

## 231 **DISCUSSION**

### 232 **Overview of findings**

233 Using an adapted group concept mapping method in four expert workshops, we developed a concept  
 234 map to visualise how the proposed TV and online food advertising regulations may impact on the  
 235 commercial food system, health and society. The concept map illustrates that the pathways between  
 236 the regulations and these impact domains will be determined by the reactions of stakeholders.

### 237 **Strengths and limitations**

238 To our knowledge, this is the first cross-sectoral attempt to explicitly theorise how regulations of this  
 239 kind may impact on the commercial food system, health and society. Incorporating the views of a  
 240 range of experts with different perspectives and interests allowed us to create a comprehensive  
 241 articulation of the ways the regulations may positively or negatively affect public health. As with any  
 242 qualitative research, our map does not claim to be representative of views of the wider groups that  
 243 participants represent.[30] Instead, we intended to sample a diverse range of expert views related to  
 244 food marketing and its regulation. Including participants from diverse sectors is a strength of the study  
 245 as it enabled the proposed regulations to be theorised expansively.

246 We necessarily invited more individuals than those who ultimately participated. The timing of the data  
 247 collection period was a common reason for non-participation in the workshops, as it coincided with  
 248 summer and school holidays in the UK, which may have made it difficult for those with child caring  
 249 responsibilities to attend. To accommodate individuals' other commitments, we held smaller  
 250 workshops across various times and days. Doing so increased the participation in our study, but it may  
 251 have lost some discussion and synergy that larger groups allow.

1  
2  
3 252 We found it difficult to recruit individuals from industry and government organisations. Employees  
4  
5 253 from these sectors rarely have their contact details listed on public-facing websites, unlike those from  
6  
7 254 academia and civil society. Government organisations expressed reluctance to contribute information  
8  
9 255 beyond what was already in the public domain.[31] There may have also been reluctance from  
10  
11 256 industry to engage with our research due to inherent differences between the goals of public health  
12  
13 257 researchers and of the food industry. Industry perspectives in our study may therefore be more  
14  
15 258 sympathetic to public health goals than those of the wider sector. Participants may have also taken  
16  
17 259 part in our study to pursue their own agenda, as industry actors have previously sought to undermine  
18  
19 260 food advertising regulations.[32,33] There are some differences in the contributions made by industry  
20  
21 261 participants compared with non-industry ones (**Appendix 2** and **3**). However, the nature of the  
22  
23 262 workshop content, holding workshops with experts from non-industry sectors, and verifying findings  
24  
25 263 with all participants, left little room for industry interests to overly-dominate our concept map.

26  
27 264 Conducting the workshops in person may have achieved different results, as some participants may  
28  
29 265 have felt more able to share sensitive information in person. However, online workshops widened  
30  
31 266 attendance to those who would have been unable to attend in-person. To avoid some of the potential  
32  
33 267 challenges of collecting data using Zoom, we employed several recommended strategies.[34] This  
34  
35 268 included using screen-sharing and clear greetings to develop rapport, using back-up recording devices,  
36  
37 269 holding facilitator briefings to avoid technical issues, and establishing 'house rules' to ease  
38  
39 270 participants' experiences.[34] To maintain participant engagement, workshop duration was limited to  
40  
41 271 two hours, and primarily focused on capturing concepts rather than exhaustively detailing the  
42  
43 272 pathways between them. Though it may have increased participant fatigue and burden, holding longer  
44  
45 273 workshops may have allowed time to capture additional concepts and pathways. As a form of  
46  
47 274 member-checking,[35] we verified the master map with all workshop participants by email, in a  
48  
49 275 further attempt to ensure the final concept map accurately represented participants' contributions  
50  
51 276 and to allow additional comments.

### 277 **Interpretation of findings**

52  
53 278 The concept map can be used to illustrate pathways through which the reactions of food and drink  
54  
55 279 companies may serve or undermine the public health goals of the regulations. Here, we describe three  
56  
57 280 potential scenarios: (i) adaptations are made to the regulations in ways that reinforce positive impacts  
58  
59 281 on public health; (ii) adaptations are made to the regulations in ways that undermine impacts on public  
60  
282 health; and (iii) technicalities of the regulations cover too few unhealthy food products and advertising  
283 opportunities to make a substantial difference to public health. As it is unlikely all companies will



1  
2  
3 284 respond uniformly, a combination of the three scenarios may follow the implementation of the  
4  
5 285 regulations.

6  
7 286 Scenario 1: adaptations reinforce positive impacts of the regulations on public health

8  
9 287 Companies may reduce their TV and online advertising for regulated HFSS products, as they will have  
10  
11 288 less opportunity for advertisements. Doing so reduces people's exposure to HFSS adverts, which may  
12  
13 289 prompt corresponding reductions in demand, purchases and consumption of the associated HFSS  
14  
15 290 products. Consequently, this will reduce the total number of calories consumed by individuals,  
16  
17 291 improving health outcomes both associated with, and independent of, body weight.

18  
19 292 To make up lost revenue from fewer HFSS product purchases, companies may increase TV and online  
20  
21 293 advertising for their products that are out of the scope of the regulations (e.g., 'spotlighting' low-fat,  
22  
23 294 -salt and -sugar alternatives). They may also engage with diet-related health issues, which could  
24  
25 295 include developing and advertising new products that are out of scope of the regulations, particularly  
26  
27 296 if there is public support for the regulations and corresponding falls in demand for HFSS products.  
28  
29 297 Doing so reduces the proportion of HFSS products (relative to non-HFSS) available in the food system.

29  
30 298 Reduced exposure to HFSS adverts may change social norms about the acceptability of consuming  
31  
32 299 HFSS products. It may also change a consumerism mindset that may be encouraged by adverts to over-  
33  
34 300 purchase and consume products. These changes could contribute to societal shifts that reinforce  
35  
36 301 lower demand for HFSS products and change macro-level eating behaviours.

37 302 Scenario 2: adaptations undermine impacts of the regulations on public health

38  
39 303 Food and drink companies could also minimise losses incurred by the regulations by redirecting their  
40  
41 304 efforts towards unregulated forms of marketing ('balloon effect'). Companies could increase their  
42  
43 305 expenditure on brand advertising, sports sponsorship, or advertising outdoors or in print or audio  
44  
45 306 media, none of which are intended to be covered by the regulations. It is unclear how this may affect  
46  
47 307 people's total exposure to marketing, and their resultant demand for HFSS products. Companies may  
48  
49 308 also fear the implementation of further regulations that could affect their performance, and so may  
50  
51 309 lobby against them. Lobbying could change future regulations such that their impact is limited, and in  
52  
53 310 turn, may mean that other, comparable regulations also have less chance of being implemented.

54  
55 311 To implement regulations, companies may increase the amount of data they collect about the  
56  
57 312 population. Such data gathering constitutes greater digital surveillance that impacts society (for  
58  
59 313 example, privacy rights),[36] but could also inform more targeted marketing that is known to be highly  
60  
314 effective at encouraging sales and consumption.[37–39]

1  
2  
3 315 Scenario 3: technicalities hinder potential impacts of the regulations on public health  
4

5 316 The regulations have a specific set of HFSS withing scope, which has notable exemptions such as some  
6  
7 317 salty foods. TV and online advertising for products exempt from the regulations may continue, as may  
8  
9 318 the corresponding purchasing and consumption of these products. Some participants reported that  
10  
11 319 the proposed scope of the regulations differ to that of other policies. Lack of consistency with other  
12  
13 320 regulations may make it costly – perhaps to the point of being futile – for companies to respond to  
14  
15 321 the regulations by developing new products that are compliant with all related regulations. Limited  
16  
17 322 development of new products would restrict the degree of transformation in the food system.  
18  
19 323 Furthermore, unlike other regulations, these advertising regulations are not defined by portion size  
20  
21 324 nor are smaller portion sizes an explicit objective of the regulations. This means there is no incentive  
22  
23 325 for companies to produce smaller product sizes, which could otherwise contribute towards reducing  
24  
25 326 calorie consumption via HFSS products.

26  
27 327 As advertising by small and medium enterprises are also exempt from the regulations, larger  
28  
29 328 companies may ‘atomise’ by creating smaller off-shoot companies, which can continue to advertise  
30  
31 329 and sell HFSS products without limitation by the regulations. Advertising of HFSS outside of the  
32  
33 330 watershed hours will still be permitted on TV and on-demand services, and large HFSS companies can  
34  
35 331 afford the high price of advertising slots likely to occur after 9pm. TV advertising after 9pm may  
36  
37 332 therefore become saturated with HFSS products, which may limit the impact of the regulations on  
38  
39 333 adults’ and older teenagers’ consumption habits and, by extension, that of the children they are  
40  
41 334 responsible for.

### 335 **Comparison to existing literature**

42  
43 336 Many existing models exist to illustrate how food marketing affects behaviour and health (e.g.,[8])  
44  
45 337 and logic models are regularly produced to illustrate how other diet-related public health regulations  
46  
47 338 may work. Methods for developing such models have evolved to appreciate the complexity of the  
48  
49 339 surrounding system in which they reside,[40] but to our knowledge, these have been rarely applied in  
50  
51 340 the context of diet-related health interventions,[41] and not applied to food advertising regulations  
52  
53 341 before. The concept map we developed here is the first we are aware of to show how food marketing  
54  
55 342 regulations may work by interacting with their surrounding system.

56  
57 343 The concept map we developed illustrates ways that reactions to the regulations will reinforce or  
58  
59 344 undermine their impact on public health, reinforcing the hypotheses of earlier work. [9] The potential  
60  
345 for some of these pathways to exist has been evidenced elsewhere. Analyses have found that 57 of  
346 65 brands associated with HFSS had an easily identifiable HFSS product, and the majority (84%) of

1  
2  
3 347 these products had an alternative non-HFSS product from the same brand, master brand, parent  
4  
5 348 company, or license holder company brand portfolio in the UK.[42] Evidence also indicates that HFSS  
6  
7 349 companies have reformulated and developed new products in responses to diet-related policies in the  
8  
9 350 UK, such as the Soft Drinks Industry Levy.[43,44] This evidence corresponds with pathways in the map  
10 351 that show how companies could redistribute advertising from regulated to unregulated products.

11  
12 352 Pathways that illustrate the risk of food companies undermining the regulations may be particularly  
13  
14 353 plausible given existing evidence has documented industry opposition to HFSS advertising regulations  
15  
16 354 in the UK.[32,33] The UK government's Department for Digital, Culture, Media & Sport impact  
17  
18 355 assessment of the regulations also assumed that a degree of HFSS advertising will be displaced to  
19 356 other media,[31] as has existing research on the TV regulation specifically.[9,45] It is also widely  
20  
21 357 documented in broader literature that efforts to undermine such regulations often form part of wider  
22  
23 358 market strategies that, when exerted by powerful and global corporations, are difficult to address with  
24  
25 359 singular regulations.[46] Our concept map builds on this evidence by elucidating pathways through  
26  
27 360 which regulation may be undermined, from which it may be possible to adapt the proposed  
28  
29 361 regulations or implement additional, complementary ones to maximise the likelihood of the  
30  
31 362 regulations achieving their public health goals.

### 31 363 **Implications and further research**

32  
33  
34 364 As the TV and online advertising regulations are not yet implemented, our findings could be used to  
35  
36 365 augment the proposed legislation to encourage stakeholder reactions that maximise the regulations  
37  
38 366 potential benefits. Ensuring that definitions underpinning the legislation, particularly those relating to  
39  
40 367 product categories, harmonise with other legislation affecting commercial food providers may double-  
41  
42 368 down the incentive to reformulate or develop new, non-HFSS products rather than market HFSS  
43  
44 370 products by other means. Expanding the existing definition to a wider range of foods (e.g., salty snacks  
45  
46 371 currently exempt) could have the same effect. Implementing comparable regulations on other forms  
47  
48 372 of marketing, such as a ban on outdoor advertising of HFSS as has been seen in London,[47] would  
49  
50 373 also limit opportunity to redistribute advertising spend for HFSS. Expediting the implementation of  
51  
52 374 other regulations affecting the commercial food system, such as the proposed volume and location  
53  
54 375 price promotion regulations,[48] has similar potential to maximise the benefit of the TV and online  
55  
56 376 advertising ones by limiting opportunities for redistributing efforts to unregulated marketing. Some  
57  
58 377 of these proposed alterations echo responses to the Department of Health and Social Care, and  
59  
60 378 Department For Digital, Culture, Media and Sport 2020 policy consultation 2020 policy  
379  
380 379 consultation.[49] That they were repeated and validated by experts in multiple related fields included  
in our study reinforce their potential benefit.

1  
2  
3 380 The concept map could be used to design a complexity-informed evaluation of the regulations.  
4  
5 381 Complex explanations of intervention impacts appreciate that instead of a singular cause-effect  
6  
7 382 pathway, interventions can act as stimuli that send reverberations across the system in which they  
8  
9 383 reside.[50,51] Complex adaptive system methods also appreciate the role of relationships between  
10  
11 384 actors contributing to a variety of processes operating at different levels and scale to produce  
12  
13 385 intervention outcomes.[40] In doing so, they help avoid finding a wrong answer to important  
14  
15 386 questions,[52,53] and may help measure the impact of unintended consequences alongside the  
16  
17 387 outcomes that the policy sets out to achieve.[54] By explicitly exploring the connections in a complex  
18  
19 388 system, these methods may also identify novel leverage points which could be targeted by future  
20  
21 389 interventions. Though the map developed in our study was not explicitly conceived in systems  
22  
23 390 thinking, it has many systemic qualities (e.g., emphasises the role of relationships) and correlates with  
24  
25 391 other methods such as 'system mapping' that have been identified as a key component of systems-  
26  
27 392 informed evaluations.[40] The concept map could be used to define focal areas for evaluative studies  
28  
29 393 of both the intended and unintended consequences of the regulations or could form the basis of other  
30  
31 394 systems evaluation methods.

32  
33 395 A benefit of theory, here in the form of a concept map, is that it enables the application of findings  
34  
35 396 elsewhere.[18,19] The presence of food marketing regulations in other countries[55] – albeit different  
36  
37 397 to the ones proposed in the UK - suggests there may be political appetite to learn from the UK's  
38  
39 398 experience. For example, policymakers could refer to the map to consider mechanisms and pathways  
40  
41 399 that are particularly relevant to their country context, and thus important to consider in developing  
42  
43 400 their legislation. Findings that emerge from an evaluation based on the map would also be particularly  
44  
45 401 applicable in other countries and contexts, as the maps clarifies how they are embedded with other  
46  
47 402 stakeholders' adaptations following the implementation of the regulations.

## 43 403 **CONCLUSIONS**

44  
45 404 While the proposed UK TV and online food advertising regulations will be some of the most restrictive  
46  
47 405 in the world, the concept map developed in this paper illustrates that the extent to which they improve  
48  
49 406 diet-related health will ultimately be determined by stakeholder reactions in the surrounding system.  
50  
51 407 The map may be used as a basis for establishing a comprehensive evaluation of the UK regulations,  
52  
53 408 and to inform similar regulations elsewhere. To realise the full potential of the regulations, UK  
54  
55 409 policymakers may also use the map to identify and prevent loopholes in the legislations before they  
56  
57 410 are implemented.

## 58 411 **FIGURE LEGEND**

59  
60 412 Figure 1 Summary of method used to develop the concept map

1  
2  
3  
4  
5  
6  
7  
8  
9  
10  
11  
12  
13  
14  
15  
16  
17  
18  
19  
20  
21  
22  
23  
24  
25  
26  
27  
28  
29  
30  
31  
32  
33  
34  
35  
36  
37  
38  
39  
40  
41  
42  
43  
44  
45  
46  
47  
48  
49  
50  
51  
52  
53  
54  
55  
56  
57  
58  
59  
60

413 Figure 2 Examples of mapping concepts and pathways using Miro

414 Figure 3 Concept map of pathways through which the proposed UK TV and online advertising

415 regulations may affect the commercial food system, health and society

For peer review only

1  
2  
3 416 **FUNDING**

4  
5 417 This project was funded by the National Institute for Health Research Public Health Research  
6  
7 418 Programme (project number 133570). The views and opinions expressed therein are those of the  
8  
9 419 authors and do not necessarily reflect those of the Public Health Research Programme, NIHR, NHS or  
10  
11 420 the Department of Health. HF, MW, JA are supported by the MRC Epidemiology Unit, University of  
12  
13 421 Cambridge [grant number MC/UU/00006/7].

14  
15 422 **COMPETING INTERESTS**

16 423 JA and MW report research grants from the Medical Research Council, the Biotechnology and  
17  
18 424 Biological Sciences Research Council, the Canadian Institutes of Health Research, the Department of  
19  
20 425 Health & Social Care Policy Research Units, and National Institute for Health Research during the  
21  
22 426 conduct of the study. MW is a member of the Expert Advisory Group of the Food Foundation, a  
23  
24 427 Community Interest Company in the UK that is leading work on food insecurity, including  
25  
26 428 coordinating an ongoing independent inquiry into childhood food insecurity, led by the All-Party  
27  
28 429 Parliamentary Group on Hunger and Food Poverty. HF previously worked for a market research  
29  
30 430 company, which conducts research on behalf of many companies, including those from the food and  
31  
32 431 drink industry. HF, JA and MW have submitted evidence to the Department of Health and Social  
33  
34 432 Care, and Department For Digital, Culture, Media and Sport 2020 consultation for the regulations  
35  
36 433 under study, available here: [https://www.cedar.iph.cam.ac.uk/resources/evidence-](https://www.cedar.iph.cam.ac.uk/resources/evidence-submissions/#HFSSadban)  
37  
38 434 [submissions/#HFSSadban](https://www.cedar.iph.cam.ac.uk/resources/evidence-submissions/#HFSSadban). RS reports grants from the Medical Research Council, National Institute  
39  
40 435 for Health Research, Wellcome Trust and Food Standards Agency during the conduct of the study. EB  
41  
42 436 reports grants from Public Health England during the conduct of the study. PS reports grants from  
43  
44 437 British Heart Foundation, National Institute for Health Research, Medical Research Council and  
45  
46 438 Wellcome Trust during the conduct of the study. The authors declare no other conflicts of interest.

47  
48  
49  
50 439 **DATA AVAILABILITY STATEMENT**

51  
52 440 Each workshop map is available in **Appendix 2** but recordings are not available as it is not possible to  
53  
54 441 sufficiently anonymise participants.

55  
56 442 **EXCLUSIVE LICENSE**

57  
58 443 I, the Submitting Author has the right to grant and does grant on behalf of all authors of the Work  
59  
60 444 (as defined in the below author licence), an exclusive licence and/or a non-exclusive licence for  
445 contributions from authors who are: i) UK Crown employees; ii) where BMJ has agreed a CC-BY  
446 licence shall apply, and/or iii) in accordance with the terms applicable for US Federal Government  
447 officers or employees acting as part of their official duties; on a worldwide, perpetual, irrevocable,

1  
2  
3 448 royalty-free basis to BMJ Publishing Group Ltd (“BMJ”) its licensees and where the relevant Journal is  
4  
5 449 co-owned by BMJ to the co-owners of the Journal, to publish the Work in BMJ Open and any other  
6  
7 450 BMJ products and to exploit all rights, as set out in our licence.

8  
9 451 The Submitting Author accepts and understands that any supply made under these terms is made by  
10  
11 452 BMJ to the Submitting Author unless you are acting as an employee on behalf of your employer or a  
12  
13 453 postgraduate student of an affiliated institution which is paying any applicable article publishing  
14  
15 454 charge (“APC”) for Open Access articles. Where the Submitting Author wishes to make the Work  
16  
17 455 available on an Open Access basis (and intends to pay the relevant APC), the terms of reuse of such  
18  
19 456 Open Access shall be governed by a Creative Commons licence – details of these licences and which  
20  
21 457 Creative Commons licence will apply to this Work are set out in our licence referred to above.

## 22 458 **CONTRIBUTORS**

23 459 EB, PS, RS, MW and JA conceived the study and acquired funding. HF and JA developed the  
24  
25 460 methodology and accompanying resources and conducted the workshops. HF collated and validated  
26  
27 461 the data. HF prepared the manuscript, and the draft versions were critically reviewed by EB, PS, RS,  
28  
29 462 MA and JA. All authors approved the final manuscript.

## REFERENCES

- 1  
2  
3  
4  
5 463 1 World Health Organization. Set of recommendations on the marketing of foods and non-  
6 464 alcoholic beverages to children. World Health Organization.  
7  
8 465 2010;:14.<https://www.who.int/dietphysicalactivity/publications/recsmarketing/en/>  
9 466 (accessed 3 Nov 2017).
- 11  
12 467 2 Boyland EJ, Nolan S, Kelly B, *et al.* Advertising as a cue to consume: A systematic review and  
13 468 meta-analysis of the effects of acute exposure to unhealthy food and nonalcoholic beverage  
14 469 advertising on intake in children and adults. *American Journal of Clinical Nutrition*  
15  
16 470 2016;**103**:519–33. doi:10.3945/ajcn.115.120022
- 17  
18  
19 471 3 Smith R, Kelly B, Yeatman H, *et al.* Food Marketing Influences Children’s Attitudes,  
20 472 Preferences and Consumption: A Systematic Critical Review. *Nutrients* 2019;**11**:875.  
21  
22 473 doi:10.3390/nu11040875
- 23  
24  
25 474 4 Cairns G. A critical review of evidence on the sociocultural impacts of food marketing and  
26 475 policy implications. *Appetite* 2019;**136**:193–207. doi:10.1016/j.appet.2019.02.002
- 27  
28  
29 476 5 American Marketing Association. Definitions of Marketing. American Marketing Association.  
30 477 <https://www.ama.org/AboutAMA/Pages/Definition-of-Marketing.aspx> (accessed 22 Oct  
31 478 2017).
- 32  
33  
34 479 6 McCarthy JE. *Basic Marketing. A Managerial Approach*. Homewood, IL : Irwin 1964.
- 35  
36  
37 480 7 The Food Foundation. The Broken Plate 2020: The state of the nations Food System.  
38 481 2020.[https://foodfoundation.org.uk/wp-content/uploads/2020/09/FF-Broken-Plate-2020-](https://foodfoundation.org.uk/wp-content/uploads/2020/09/FF-Broken-Plate-2020-DIGITAL-FULL.pdf)  
39 482 DIGITAL-FULL.pdf (accessed 6 Mar 2021).
- 40  
41  
42 483 8 Kelly B, King L, Chapman K, *et al.* A hierarchy of unhealthy food promotion effects: Identifying  
43 484 methodological approaches and knowledge gaps. *American Journal of Public Health*.  
44 485 2015;**105**:e86–95. doi:10.2105/AJPH.2014.302476
- 45  
46  
47 486 9 Mytton O, Boyland E, Adams J, *et al.* The potential health impact of restricting less-healthy  
48 487 food and beverage advertising on UK television between 05.30 and 21.00 hours: a modelling  
49 488 study. *PLoS Medicine* 2020;**17**:e1003212. doi:10.1371/journal.pmed.1003212
- 50  
51  
52 489 10 Department of Health & Social Care. Tackling obesity: empowering adults and children to live  
53 490 healthier lives. 2020.[https://www.gov.uk/government/publications/tackling-](https://www.gov.uk/government/publications/tackling-obesity%02government-strategy/tackling-obesity-empowering-adults-and-children-to-live-)  
54 491 obesity%02government-strategy/tackling-obesity-empowering-adults-and-children-to-live-
- 55  
56  
57  
58  
59  
60



- 1  
2  
3 492 healthier%02lives#empowering-everyone-with-the-right-information-to-make-healthier-  
4 choices (accessed 14 Sep 2020).  
5 493  
6  
7 494 11 UK Government. Health and Care Bill. London, UK: : UK Parliament 2021.  
8  
9 495 <https://bills.parliament.uk/bills/3022>  
10  
11 496 12 Taillie LS, Busey E, Stoltze FM, *et al.* Governmental policies to reduce unhealthy food  
12 marketing to children. *Nutrition Reviews* 2019;**0**:1–32. doi:10.1093/nutrit/nuz059  
13 497  
14  
15 498 13 Ofcom. Media Nations 2020: UK report 2020. 2020.  
16  
17 499 [https://www.ofcom.org.uk/\\_\\_data/assets/pdf\\_file/0010/200503/media-nations-2020-uk-](https://www.ofcom.org.uk/__data/assets/pdf_file/0010/200503/media-nations-2020-uk-report.pdf)  
18 500 [report.pdf](https://www.ofcom.org.uk/__data/assets/pdf_file/0010/200503/media-nations-2020-uk-report.pdf)  
19  
20  
21 501 14 Ofcom. Media nations: UK 2021. 2021.  
22  
23 502 15 Ogilvie D, Adams J, Bauman A, *et al.* Using natural experimental studies to guide public health  
24 action: turning the evidence-based medicine paradigm on its head. *Journal of Epidemiology*  
25 503 *and Community Health* 2020;**74**:203–8. doi:10.1136/jech-2019-213085  
26 504  
27  
28  
29 505 16 White M, Aguirre E, Finegood DT, *et al.* What role should the commercial food system play in  
30 promoting health through better diet? *BMJ* 2020;**368**:m545. doi:10.1136/bmj.m545  
31 506  
32  
33 507 17 Mora F. Victims of the Balloon Effect: Drug Trafficking and U.S. Policy in Brazil and the  
34 Southern Cone of Latin America. *The Journal of Social, Political, and Economic Studies*  
35 508 1996;**21**:115.  
36 509  
37  
38  
39 510 18 Ogilvie D, Cummins S, Petticrew M, *et al.* Assessing the Evaluability of Complex Public Health  
40 Interventions: Five Questions for Researchers, Funders, and Policymakers. *Milbank Quarterly*  
41 511 2011;**89**:206–25. doi:10.1111/j.1468-0009.2011.00626.x  
42 512  
43  
44 513 19 Rosas SR. Concept mapping as a technique for program theory development: An illustration  
45 using family support programs. *American Journal of Evaluation* 2005;**26**:389–401.  
46 514  
47 515 doi:10.1177/1098214005278760  
48  
49  
50 516 20 Burke JG, O’Campo P, Peak GL, *et al.* An introduction to concept mapping as a participatory  
51 public health research method. *Qualitative Health Research* 2005;**15**:1392–410.  
52 517  
53 518 doi:10.1177/1049732305278876  
54  
55  
56 519 21 Anderson LA, Slonim A. Perspectives on the strategic uses of concept mapping to address  
57 public health challenges. *Evaluation and Program Planning* 2017;**60**:194–201.  
58 520  
59 521 doi:10.1016/j.evalprogplan.2016.08.011  
60

- 1  
2  
3 522 22 Trochim WMK. An introduction to concept mapping for planning and evaluation. *Evaluation*  
4 523 *and Program Planning* 1989;**12**. doi:10.1016/0149-7189(89)90016-5  
5  
6  
7 524 23 Tong A, Sainsbury P, Craig J. Consolidated criteria for reporting qualitative research (COREQ):  
8 525 a 32-item checklist for interviews and focus groups. *International Journal for Quality in Health*  
9 526 *Care* 2007;**19**:349–57. doi:10.1093/intqhc/mzm042  
10  
11  
12  
13 527 24 Albury C, Pope C, Shaw S, *et al*. Gender in the consolidated criteria for reporting qualitative  
14 528 research (COREQ) checklist. *International Journal for Quality in Health Care* 2021;**33**:2021.  
15 529 doi:10.1093/intqhc/mzab123  
16  
17  
18 530 25 Braun V, Clarke V. To saturate or not to saturate? Questioning data saturation as a useful  
19 531 concept for thematic analysis and sample-size rationales. *Qualitative Research in Sport,*  
20 532 *Exercise and Health* 2019;**1**–16. doi:10.1080/2159676X.2019.1704846  
21  
22  
23  
24 533 26 van der Graaf P, Forrest LF, Adams J, *et al*. How do public health professionals view and  
25 534 engage with research? A qualitative interview study and stakeholder workshop engaging  
26 535 public health professionals and researchers. *BMC Public Health* 2017;**17**:1–10.  
27 536 doi:10.1186/s12889-017-4896-1  
28  
29  
30  
31 537 27 Forde H, Solomon-Moore E. A Qualitative Study to Understand the Potential Efficacy of an  
32 538 Information-Based Sugar Reduction Intervention among Low Socioeconomic Individuals in  
33 539 the UK. *International Journal of Environmental Research and Public Health* 2019;**16**:413.  
34 540 doi:10.3390/ijerph16030413  
35  
36  
37  
38  
39 541 28 Penney T, Adams J, Briggs A, *et al*. Evaluation of the impacts on health of the proposed UK  
40 542 industry levy on sugar sweetened beverages: developing a systems map and data platform,  
41 543 and collection of baseline and early impact data. 2017.  
42  
43  
44  
45 544 29 Chatham House. Chatham House Rule. 2021.[https://www.chathamhouse.org/about-](https://www.chathamhouse.org/about-us/chatham-house-rule)  
46 545 [us/chatham-house-rule](https://www.chathamhouse.org/about-us/chatham-house-rule) (accessed 18 Aug 2021).  
47  
48  
49 546 30 Savona N, Macauley T, Aguiar A, *et al*. Identifying the views of adolescents in five European  
50 547 countries on the drivers of obesity using group model building. *European Journal Of Public*  
51 548 *Health* 2021;**ckaa251**. doi:10.1093/eurpub/ckaa251  
52  
53  
54  
55 549 31 Department for Digital Culture Media and Sport. Impact assessment: introducing a 2100 to  
56 550 0530 watershed on TV and online restriction for paid advertising of food and drink that are  
57 551 high in fat, salt and sugar (HFSS) products. London, UK: 2021.

- 1  
2  
3 552 32 Carters-White L, Chambers S, Skivington K, *et al.* Whose rights deserve protection? Framing  
4 553 analysis of responses to the 2016 committee of advertising practice consultation on the non-  
5 554 broadcast advertising of foods and soft drinks to children. *Food Policy* 2021;**104**:102139.  
6 555 doi:10.1016/j.foodpol.2021.102139  
7  
8  
9  
10 556 33 Lauber K, Hunt D, Gilmore A, *et al.* Corporate political activity in the context of unhealthy  
11 557 food advertising restrictions across Transport for London: A qualitative case study. *PLoS*  
12 558 *Medicine* 2021;**18**:e1003695. doi:10.1371/journal.pmed.1003695  
13  
14  
15  
16 559 34 Boland J, Banks S, Krabbe R, *et al.* A COVID-19-era rapid review: using Zoom and Skype for  
17 560 qualitative group research. *Public Health Research & Practice* 2021;:1–9.  
18 561 doi:10.17061/phrp31232112  
19  
20  
21  
22 562 35 Birt L, Scott S, Cavers D, *et al.* Member Checking: A Tool to Enhance Trustworthiness or  
23 563 Merely a Nod to Validation? *Qualitative Health Research* 2016;**26**:1802–11.  
24 564 doi:10.1177/1049732316654870  
25  
26  
27  
28 565 36 Tatlow-Golden M, Garde A. Digital food marketing to children: Exploitation, surveillance and  
29 566 rights violations. *Global Food Security* 2020;**27**:100423. doi:10.1016/j.gfs.2020.100423  
30  
31  
32 567 37 Montgomery KC, Chester J. Interactive Food and Beverage Marketing: Targeting Adolescents  
33 568 in the Digital Age. *Journal of Adolescent Health*. 2009;**45**.  
34 569 doi:10.1016/j.jadohealth.2009.04.006  
35  
36  
37  
38 570 38 de Jans S, van de Sompel D, Hudders L, *et al.* Advertising targeting young children: an  
39 571 overview of 10 years of research (2006–2016). *International Journal of Advertising*  
40 572 2019;**38**:173–206. doi:10.1080/02650487.2017.1411056  
41  
42  
43 573 39 Harris JL, Frazier III W, Kumanyika SK, *et al.* Increasing disparities in unhealthy food  
44 574 advertising targeted to Hispanic and Black youth. 2019.  
45  
46  
47 575 40 McGill E, Er V, Penney T, *et al.* Evaluation of public health interventions from a complex  
48 576 systems perspective: a research methods review. *Social Science & Medicine*  
49 577 2021;**272**:113697. doi:10.1016/j.socscimed.2021.113697  
50  
51  
52  
53 578 41 Penney TL, Adams J, Briggs A, *et al.* Theorising how the UK soft drinks industry levy could  
54 579 impact population level diet and health: development of a multi-sectoral systems map. In:  
55 580 *International Society for Behavioural Nutrition and Physical Activity*. 2017. 203.  
56  
57  
58 581 42 Cheek O, Froguel A, Clark M. Analysis on the potential for UK's leading food and soft drink  
59 582 brands to switch to marketing their non-HFSS products. London: 2021.

- 1  
2  
3 583 43 Pell D, Mytton O, Penney TL, *et al.* Changes in soft drinks purchased by British households  
4 associated with the UK soft drinks industry levy: controlled interrupted time series analysis.  
5 584  
6 585 *The BMJ* 2021;**372**:n254. doi:10.1136/bmj.n254  
7  
8  
9 586 44 Pell D, Penney T, Mytton O, *et al.* Anticipatory changes in British household purchases of soft  
10 drinks associated with the announcement of the Soft Drinks Industry Levy: a controlled  
11 587  
12 588 interrupted time series analysis. *PLoS Medicine* 2020;**17**:e1003269.  
13  
14 589 doi:10.1371/journal.pmed.1003269  
15  
16 590 45 Griffith R, Connell MO, Smith K, *et al.* The potential impacts of banning television advertising  
17 of HFSS food and drink before the watershed: Report produced for the Obesity Policy  
18 591  
19 592 Research Unit. Institute for Fiscal Studies. 2019.[https://www.ucl.ac.uk/obesity-policy-](https://www.ucl.ac.uk/obesity-policy-research-unit/sites/obesity-policy-research-unit/files/potentialimpactofban_new.pdf)  
20  
21 593 [research-unit/sites/obesity-policy-research-unit/files/potentialimpactofban\\_new.pdf](https://www.ucl.ac.uk/obesity-policy-research-unit/sites/obesity-policy-research-unit/files/potentialimpactofban_new.pdf)  
22 (accessed 11 Jan 2021).  
23 594  
24  
25 595 46 Wood B, Williams O, Nagarajan V, *et al.* Market strategies used by processed food  
26 manufacturers to increase and consolidate their power: a systematic review and document  
27 596  
28 597 analysis. *Globalization and health* 2021;**17**:17. doi:10.1186/s12992-021-00667-7  
29  
30  
31 598 47 Mayor of London. Press release: Mayor confirms ban on junk food advertising on transport  
32 network. Mayor of London. 2018.[https://www.london.gov.uk/press-releases/mayoral/ban-](https://www.london.gov.uk/press-releases/mayoral/ban-on-junk-food-advertising-on-transport-network-0)  
33 599  
34 600 [on-junk-food-advertising-on-transport-network-0](https://www.london.gov.uk/press-releases/mayoral/ban-on-junk-food-advertising-on-transport-network-0) (accessed 24 Mar 2021).  
35  
36  
37 601 48 Department of Health and Social Care. Restricting promotions of products high in fat, sugar  
38 and salt by location and by price: government response to public consultation.  
39 602  
40 603 2020.[https://www.gov.uk/government/consultations/restricting-promotions-of-food-and-](https://www.gov.uk/government/consultations/restricting-promotions-of-food-and-drink-that-is-high-in-fat-sugar-and-salt/outcome/restricting-promotions-of-products-high-in-fat-sugar-and-salt-by-location-and-by-price-government-response-to-public-consultati)  
41  
42 604 [drink-that-is-high-in-fat-sugar-and-salt/outcome/restricting-promotions-of-products-high-in-](https://www.gov.uk/government/consultations/restricting-promotions-of-food-and-drink-that-is-high-in-fat-sugar-and-salt/outcome/restricting-promotions-of-products-high-in-fat-sugar-and-salt-by-location-and-by-price-government-response-to-public-consultati)  
43  
44 605 [fat-sugar-and-salt-by-location-and-by-price-government-response-to-public-consultati](https://www.gov.uk/government/consultations/restricting-promotions-of-food-and-drink-that-is-high-in-fat-sugar-and-salt/outcome/restricting-promotions-of-products-high-in-fat-sugar-and-salt-by-location-and-by-price-government-response-to-public-consultati)  
45 606 (accessed 14 Mar 2021).  
46  
47 607 49 HM Government. Introducing further advertising restrictions on TV and online for products  
48 high in fat, sugar and salt (HFSS).  
49 608  
50 609 2019.[https://assets.publishing.service.gov.uk/government/uploads/system/uploads/attachm](https://assets.publishing.service.gov.uk/government/uploads/system/uploads/attachment_data/file/795412/hfss-advertising-consultation-10-april-2019.pdf)  
51  
52 610 [ent\\_data/file/795412/hfss-advertising-consultation-10-april-2019.pdf](https://assets.publishing.service.gov.uk/government/uploads/system/uploads/attachment_data/file/795412/hfss-advertising-consultation-10-april-2019.pdf) (accessed 20 Jan 2021).  
53  
54  
55 611 50 Shiell A, Hawe P, Gold L. Complex interventions or complex systems? Implications for health  
56 economic evaluation. *BMJ* 2008;**336**:1281–3. doi:10.1136/bmj.39569.510521.AD  
57 612  
58  
59  
60

- 1  
2  
3 613 51 Petticrew M. When are complex interventions “complex”? When are simple interventions  
4 “simple”? *European Journal of Public Health* 2011;**21**:397–8. doi:10.1093/eurpub/ckr084  
5 614  
6  
7 615 52 Rutter H, Savona N, Glonti K, *et al.* The need for a complex systems model of evidence for  
8 public health. *The Lancet* 2017;**390**:2602–4. doi:10.1016/S0140-6736(17)31267-9  
9 616  
10  
11 617 53 Fink DS, Keyes KM. Wrong answers: when simple interpretations create complex problems.  
12 In: El-Sayed AM, Galea S, eds. *Systems science and population health*. New York: : Oxford  
13 618 University Press 2017. 25–36.  
14 619  
15  
16  
17 620 54 Roux AVD. Complex systems thinking and current impasses in health disparities research.  
18 *American Journal of Public Health* 2011;**101**:1627–34. doi:10.2105/AJPH.2011.300149  
19 621  
20  
21 622 55 World Cancer Research Fund International. NOURISHING Database.  
22 <https://www.wcrf.org/int/policy/nourishing-database> (accessed 11 Jun 2019).  
23 623  
24  
25 624  
26  
27  
28  
29  
30  
31  
32  
33  
34  
35  
36  
37  
38  
39  
40  
41  
42  
43  
44  
45  
46  
47  
48  
49  
50  
51  
52  
53  
54  
55  
56  
57  
58  
59  
60

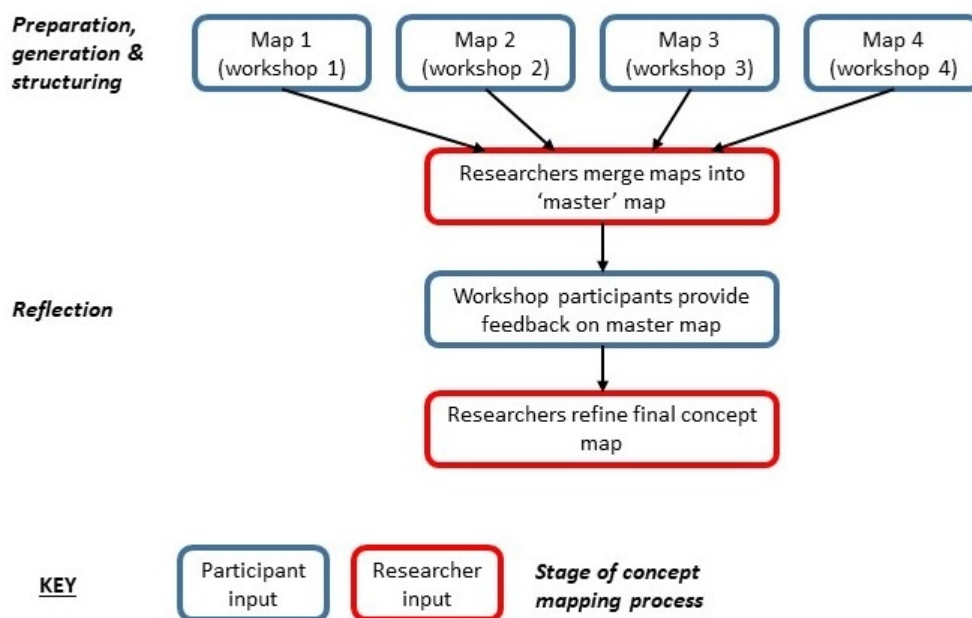

Figure 1 Summary of method used to develop the concept map

176x115mm (96 x 96 DPI)

1  
2  
3  
4  
5  
6  
7  
8  
9  
10  
11  
12  
13  
14  
15  
16  
17  
18  
19  
20  
21  
22  
23  
24  
25  
26  
27  
28  
29  
30  
31  
32  
33  
34  
35  
36  
37  
38  
39  
40  
41  
42  
43  
44  
45  
46  
47  
48  
49  
50  
51  
52  
53  
54  
55  
56  
57  
58  
59  
60

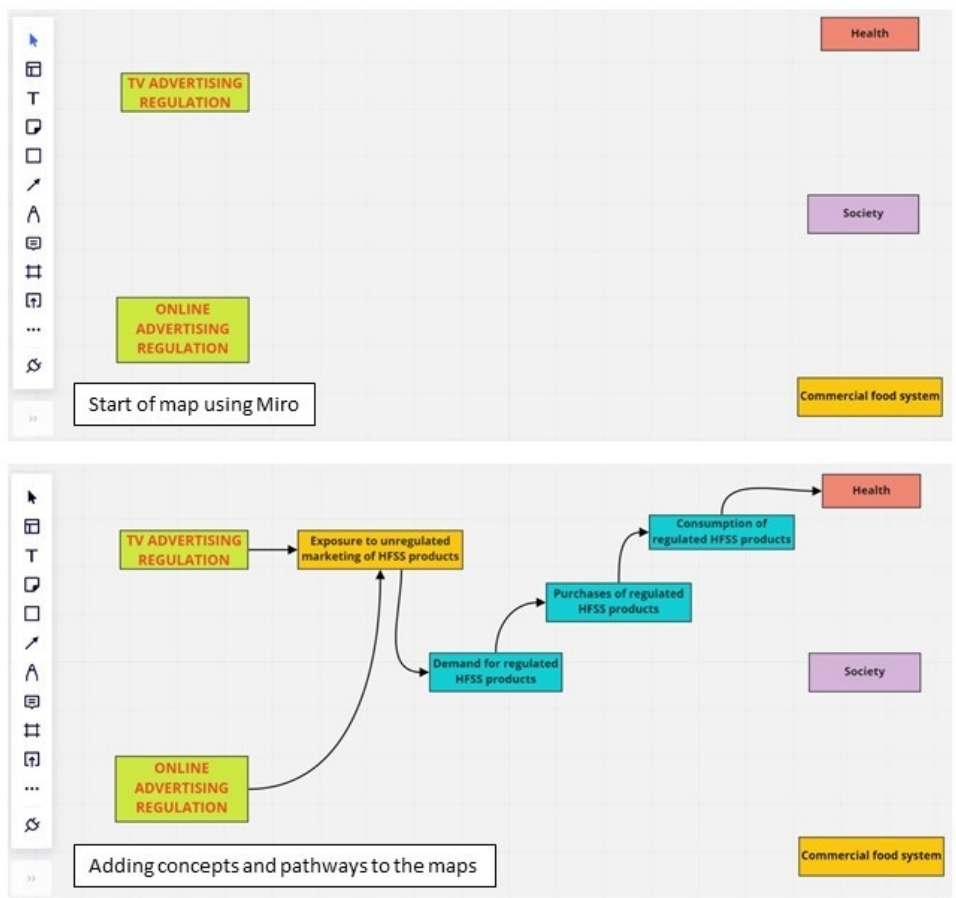

Figure 2 Examples of mapping concepts and pathways using Miro  
176x158mm (96 x 96 DPI)

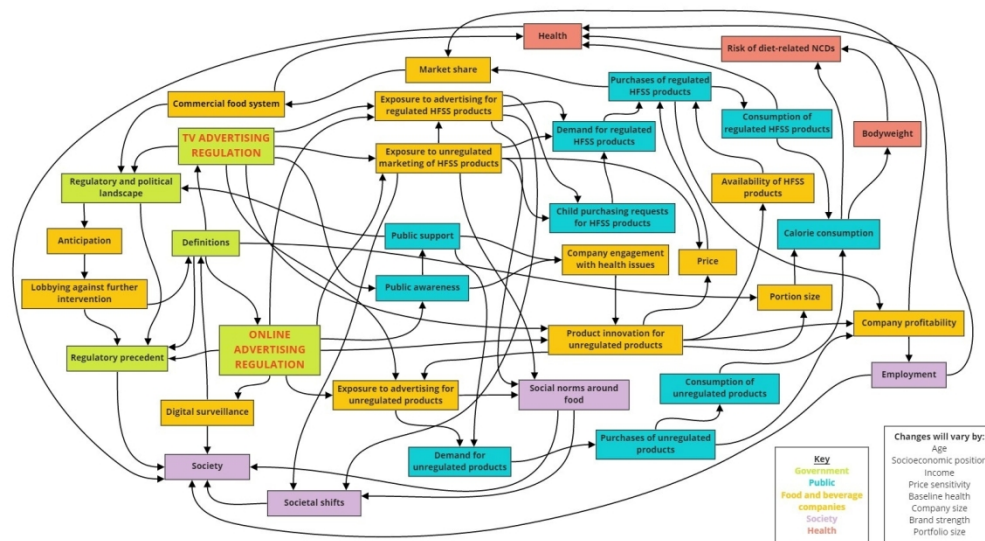

Figure 3 Concept map of pathways through which the proposed UK TV and online advertising regulations may affect the commercial food system, health

425x236mm (96 x 96 DPI)



**BOX 1: Regulation details**

It is expected that two new regulations will be implemented before the end of 2022:

1. A ban on advertisements for HFSS products shown on live broadcast TV from 0530-2100 ('TV advertising watershed'), including:
  - a. on-demand programme services under the jurisdiction of the UK.
2. A ban on online advertisements for HFSS products, including:
  - a. Non-UK regulated on-demand programme services;
  - b. Social media influencers, commercial text messaging and email, all website advertising, paid-for search listings, preferential listings on price comparison sites, in-game advertisements, in-app advertising, advergames and advertorial, online display and online video.

Restrictions will not apply to 'owned media' (online property owned and controlled, usually by a brand), brand advertising, small and media enterprises (fewer than 250 employees), audio and broadcast radio, business to business (online only), or transactional content.

'HFSS' will be defined by the 2004/2005 UK Nutrient Profiling Model and within particular categories from the Sugar Reduction Strategy. Details of the regulations may change in the lead up to implementation.

Government will appoint Ofcom as the statutory regulator, who will then appoint a day-to-day regulator (expected to be ASA).<sup>23</sup>



### Workshop 2 Map

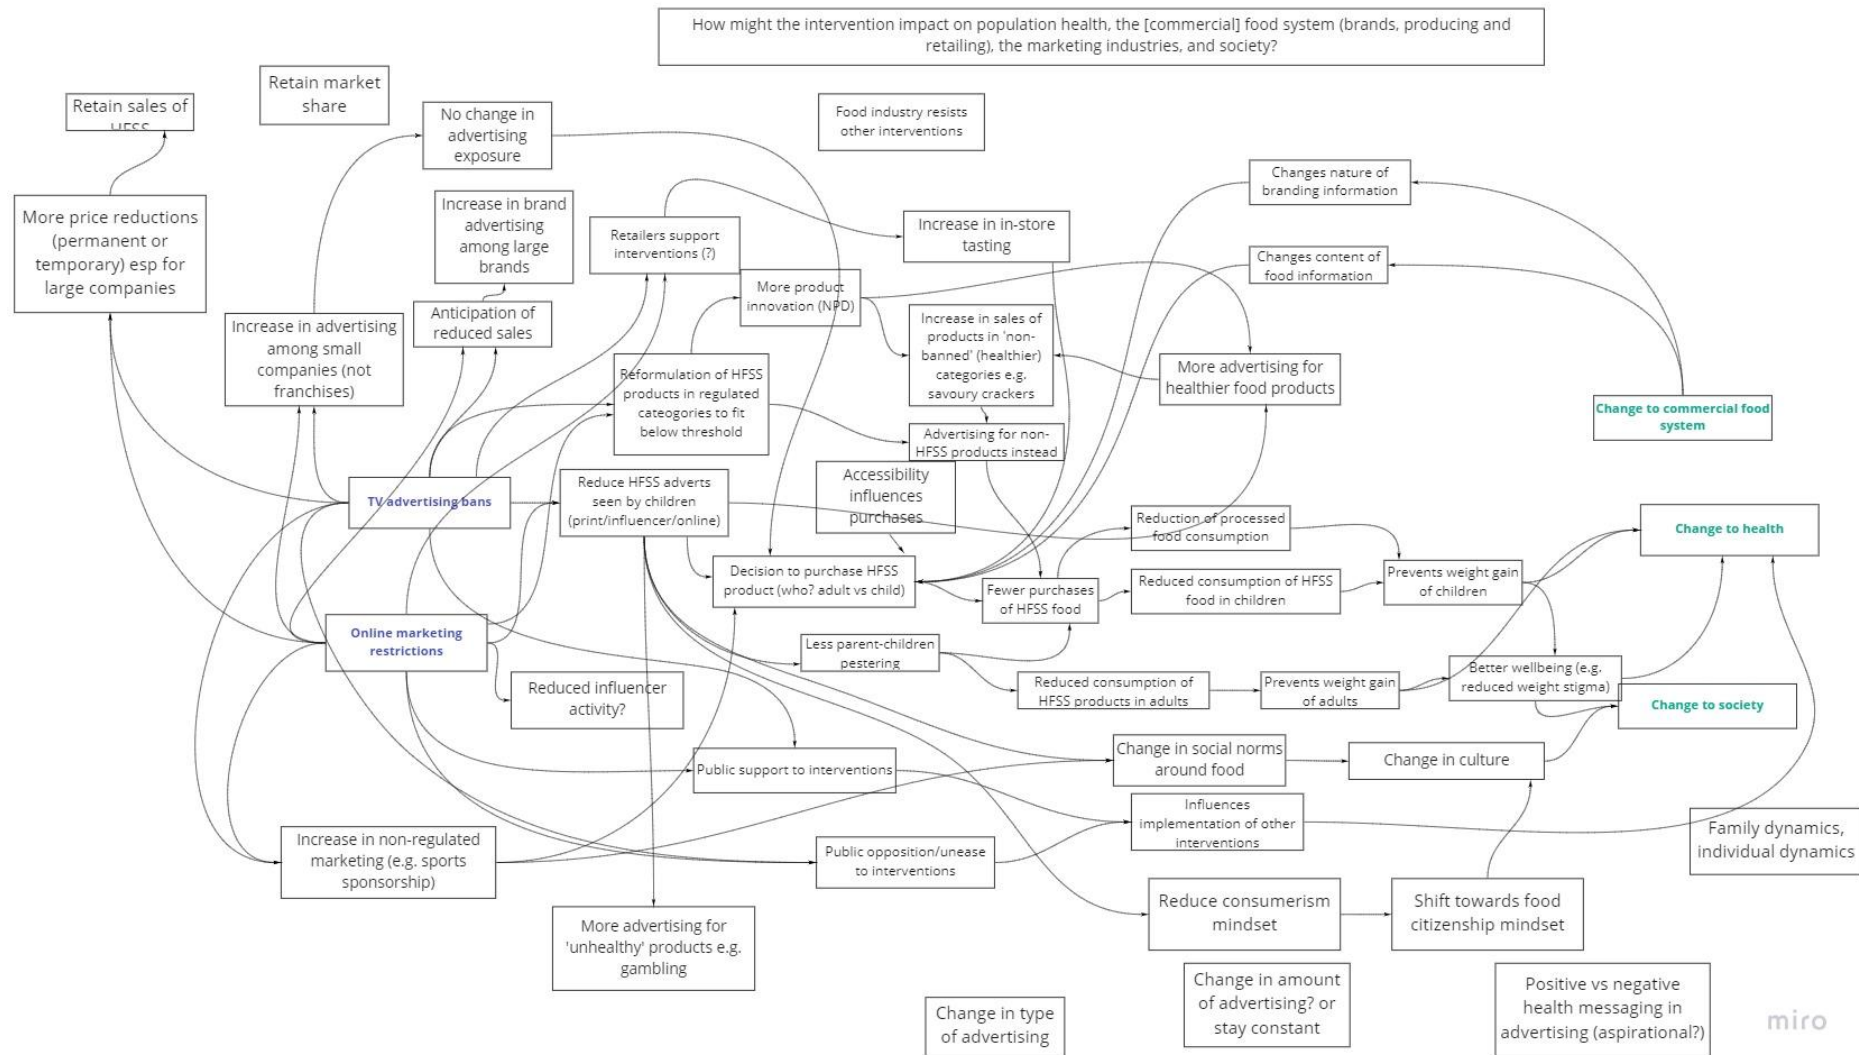

Workshop 3 Map

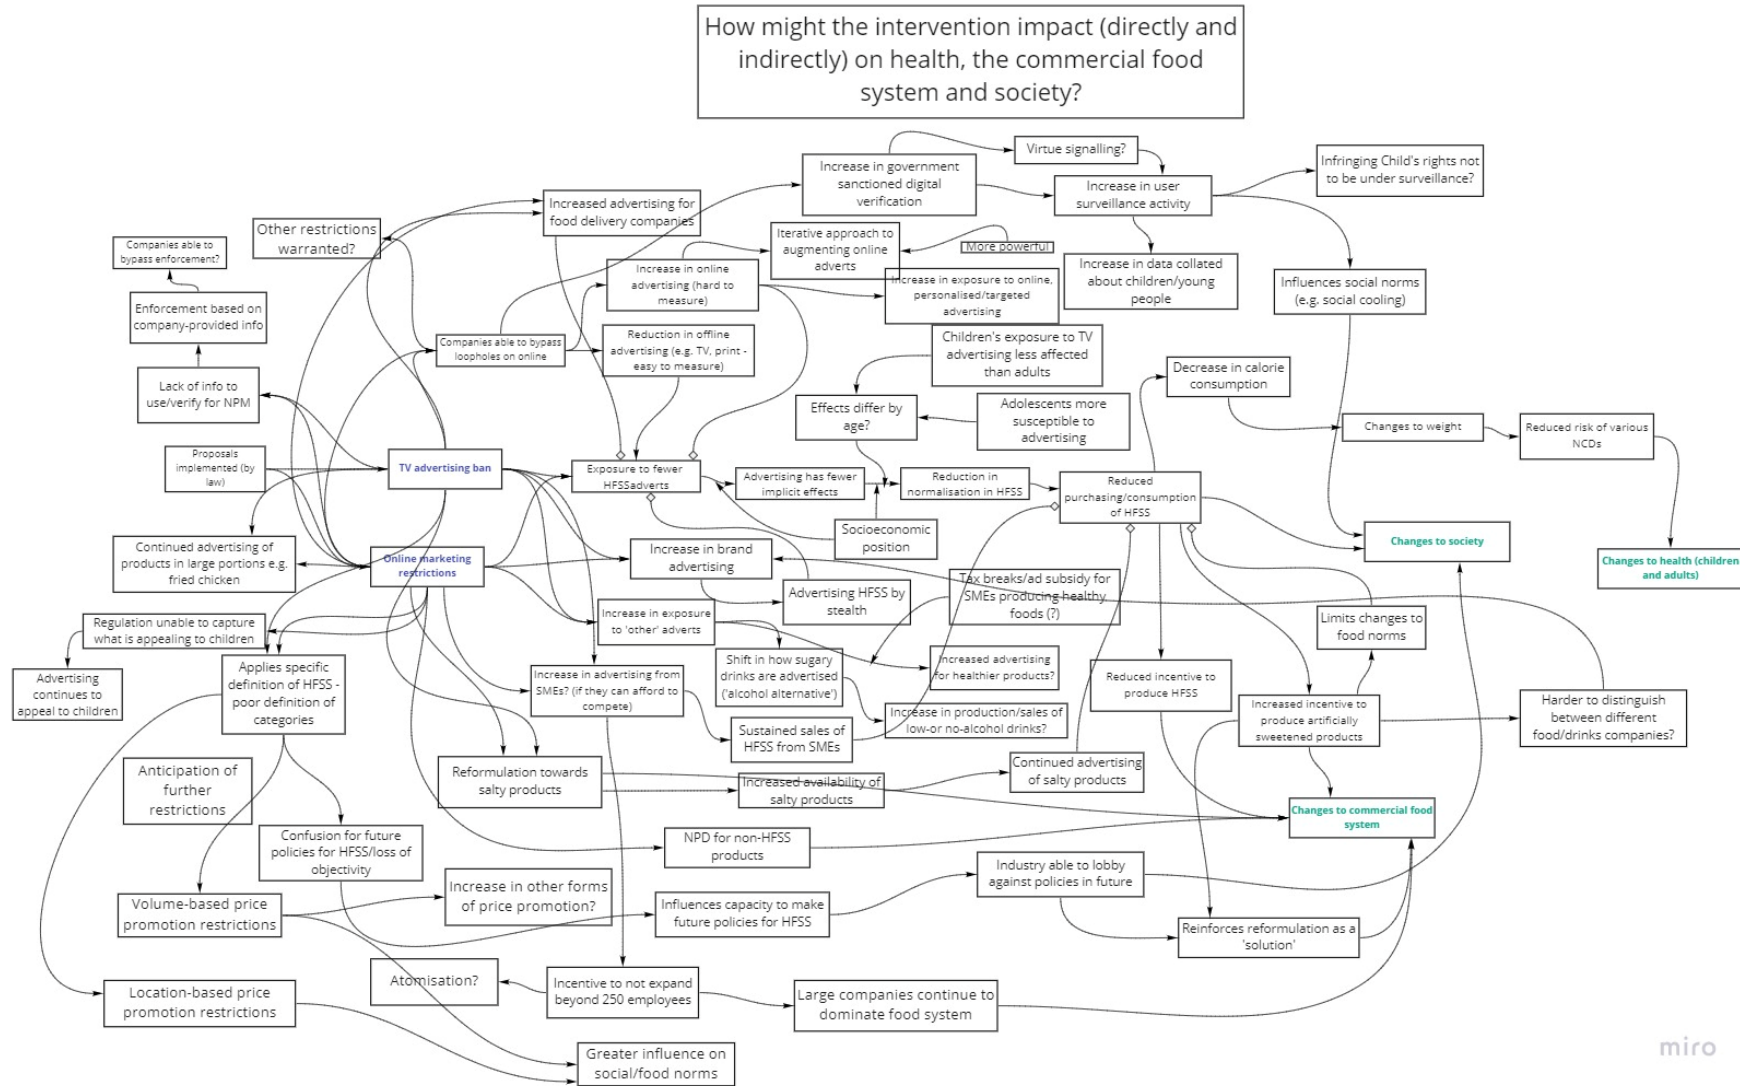

miro

Workshop 4 Map

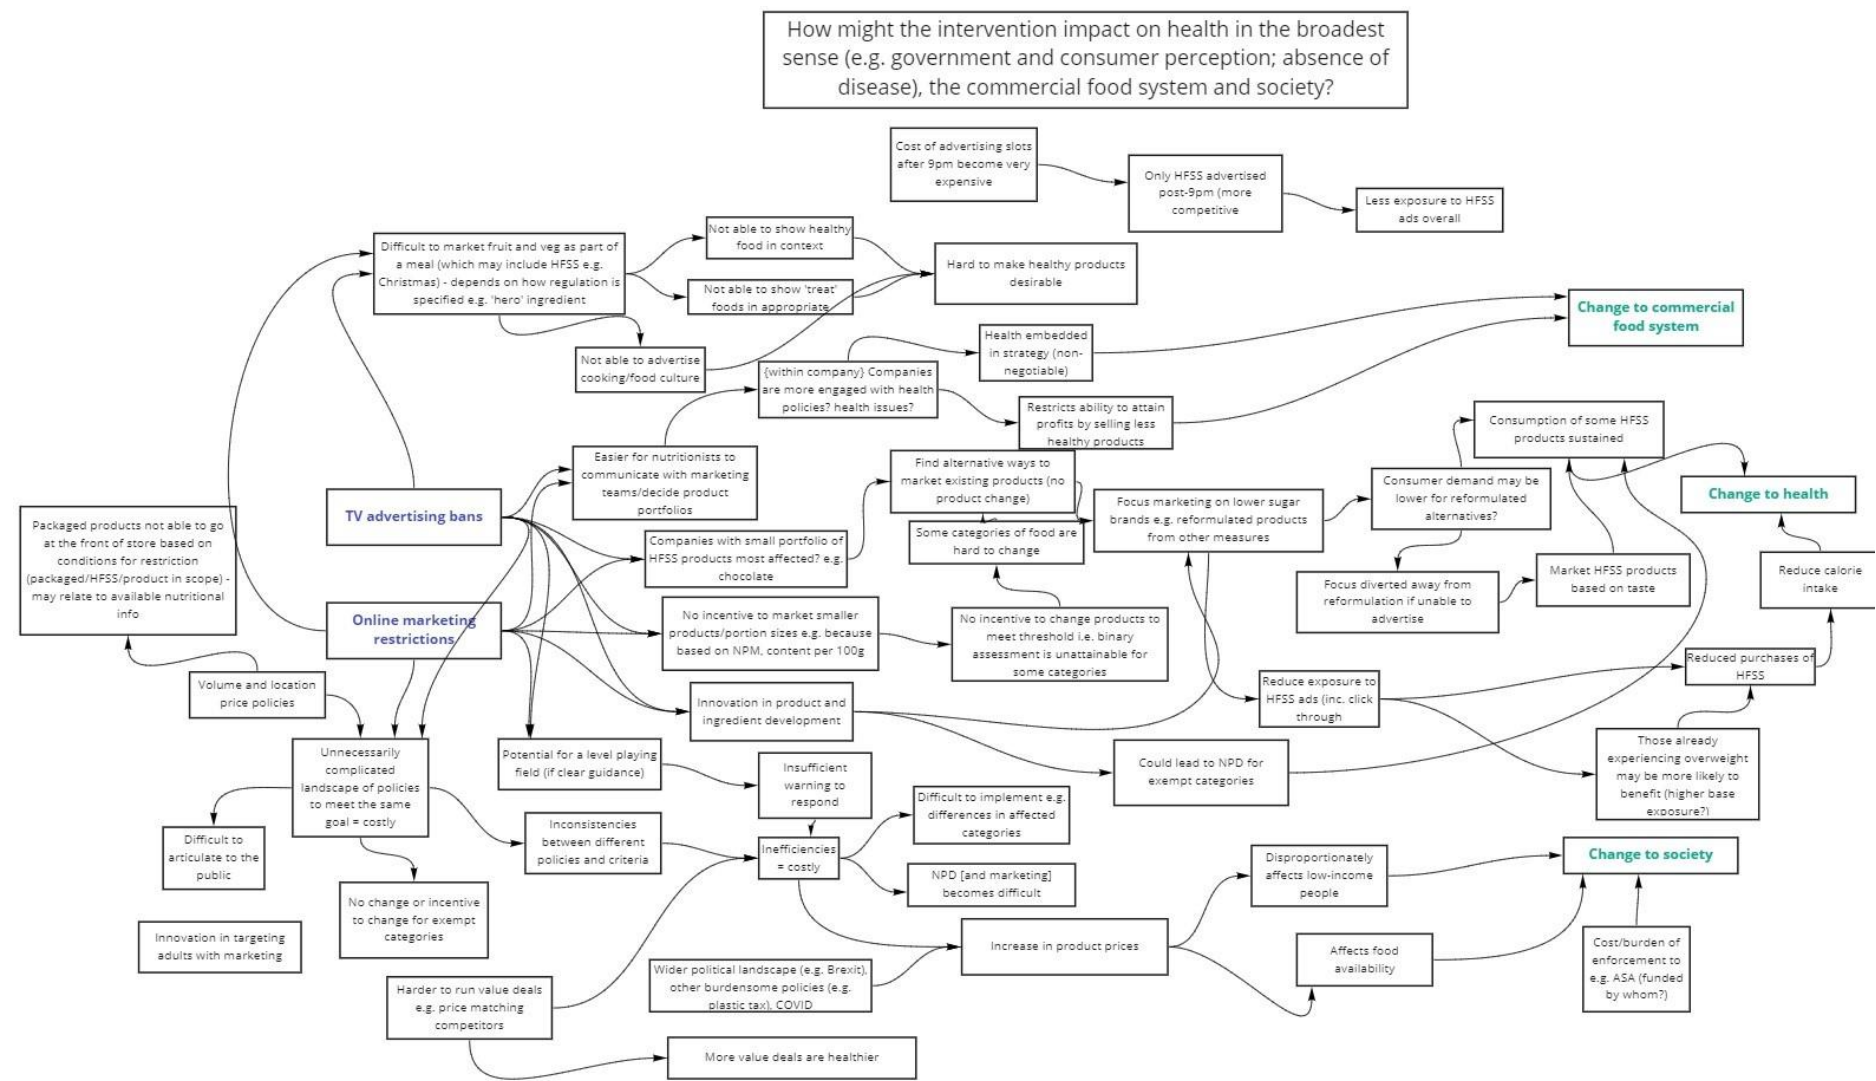

### Appendix 3: Concepts from workshop maps and resulting concepts in the final map

| Workshop 1 (non-industry)                    | Workshop 2 (non-industry)        | Workshop 3 (non-industry)         | Workshop 4 (industry)                                                            | Final map                                          |
|----------------------------------------------|----------------------------------|-----------------------------------|----------------------------------------------------------------------------------|----------------------------------------------------|
| More adept at regulations                    | Anticipation of reduced sales    | Anticipating further restrictions |                                                                                  |                                                    |
| Behaviour to pre-empt? e.g., product changes |                                  | Proposals implemented by law      |                                                                                  | <b>Anticipation</b>                                |
| Anticipate regulation                        |                                  |                                   |                                                                                  |                                                    |
| Change product availability                  |                                  |                                   | Affects food availability                                                        | <b>Availability of HFSS products</b>               |
|                                              | Prevents weight gain of children | Changes to weight                 |                                                                                  | <b>Bodyweight</b>                                  |
|                                              | Prevents weight gain of adults   |                                   |                                                                                  |                                                    |
|                                              |                                  | Decrease in calorie consumption   | Reduced calorie intake                                                           | <b>Calorie consumption</b>                         |
| Parent/child interactions                    | Less parent-children pestering   |                                   |                                                                                  | <b>Child purchasing requests for HFSS products</b> |
| Reduction in pester power                    |                                  |                                   |                                                                                  |                                                    |
| Better shopping experience                   |                                  |                                   |                                                                                  | <b>Commercial food system</b>                      |
|                                              |                                  |                                   | {within company} companies are more engaged with health policies? Health issues? | <b>Company engagement with health issues</b>       |
|                                              |                                  |                                   | Health embedded in strategy (non-negotiable)                                     |                                                    |
|                                              |                                  |                                   | Easier for nutritionists to communicate with marketing teams                     |                                                    |
| Reduction in food company revenue            |                                  |                                   | Restricts ability to attain profits by selling less healthy products             | <b>Company profitability</b>                       |

1  
2  
3  
4  
5  
6  
7  
8  
9  
10  
11  
12  
13  
14  
15  
16  
17  
18  
19  
20  
21  
22  
23  
24  
25  
26  
27  
28  
29  
30  
31  
32  
33  
34  
35  
36  
37  
38  
39  
40  
41  
42  
43  
44  
45  
46

| Workshop 1 (non-industry)                | Workshop 2 (non-industry)                        | Workshop 3 (non-industry)                                            | Workshop 4 (industry)                                        | Final map                                     |
|------------------------------------------|--------------------------------------------------|----------------------------------------------------------------------|--------------------------------------------------------------|-----------------------------------------------|
| Change in sector profitability           |                                                  |                                                                      | Cost/burden of enforcement to e.g. ASA (funded by whom?)     |                                               |
|                                          |                                                  |                                                                      | Inefficiencies = costly                                      |                                               |
| Less screen-driven snacking              | Reduced consumption of HFSS products in adults   | Reduced purchasing/ consumption of HFSS                              | Consumption of some HFSS products sustained                  | <b>Consumption of regulated HFSS products</b> |
| Change in consumption                    | Reduction of processed food consumption          |                                                                      |                                                              |                                               |
| Doing something else that's good for you | Reduced consumption of HFSS products in children |                                                                      |                                                              |                                               |
| Change in diet                           |                                                  |                                                                      |                                                              | <b>Consumption of unregulated products</b>    |
|                                          |                                                  | Applies specific definition of HFSS - poor definitions of categories | Inconsistencies between different policies and criteria      | <b>Definitions</b>                            |
|                                          |                                                  | Enforcement based on company-provided info                           |                                                              |                                               |
|                                          |                                                  | Lack of info to use/verify for NPM                                   |                                                              |                                               |
| Reduction in demand                      |                                                  |                                                                      |                                                              | <b>Demand for regulated HFSS products</b>     |
| Increase in money saved                  |                                                  |                                                                      |                                                              |                                               |
|                                          |                                                  |                                                                      | Consumer demands may be lower for reformulated alternatives? | <b>Demand for unregulated products</b>        |
|                                          |                                                  | Increase in user surveillance activity                               |                                                              | <b>Digital surveillance</b>                   |
|                                          |                                                  | Infringing Child's rights not to be under surveillance?              |                                                              |                                               |
|                                          |                                                  | Increase in surveillance activity                                    |                                                              |                                               |

| Workshop 1 (non-industry)                                | Workshop 2 (non-industry)                                            | Workshop 3 (non-industry)                                       | Workshop 4 (industry)                                                                 | Final map                                                  |
|----------------------------------------------------------|----------------------------------------------------------------------|-----------------------------------------------------------------|---------------------------------------------------------------------------------------|------------------------------------------------------------|
|                                                          |                                                                      | Increase in data collated about children/young people           |                                                                                       |                                                            |
| Changes in employment                                    |                                                                      | Incentive to not expand beyond 250 employees                    |                                                                                       | <b>Employment</b>                                          |
| Reductions in sharing of foods on social media           | No change in advertising exposure                                    | Exposure to fewer HFSS adverts                                  | Less exposure to ads overall                                                          | <b>Exposure to advertising for regulated HFSS products</b> |
|                                                          | Reduced influencer activity?                                         | Children's exposure to TV advertising less affected than adults | Reduce exposure to HFSS ads (inc. through click through)                              |                                                            |
|                                                          | Change in amount of advertising or stay constant                     | Advertising has fewer implicit effects                          | Market HFSS products based on taste                                                   |                                                            |
|                                                          | Reduce HFSS adverts seen by children                                 | More powerful                                                   | Only HFSS advertised post-9pm (more competitive)                                      |                                                            |
|                                                          | Positive vs. negative health messaging in advertising (aspirational) | Virtue signalling                                               |                                                                                       |                                                            |
|                                                          | Changes content of food information                                  | Harder to distinguish between different food/drinks companies   |                                                                                       |                                                            |
|                                                          |                                                                      | Iterative approach to augmenting online adverts                 |                                                                                       |                                                            |
| Replaced with something else (?) i.e., not HFSS          | Advertising for non-HFSS products instead                            | Exposure to non-HFSS adverts                                    | Focus marketing on lower sugar brands e.g., reformulated products from other measures | <b>Exposure to advertising for unregulated products</b>    |
| Increase advertising of F&V, healthier products in brand | More advertising for healthier food products                         | Increased advertising for healthier products                    | More value deals are healthier                                                        |                                                            |
|                                                          | More advertising for 'unhealthy products' e.g., gambling             | Increase in exposure to 'other' adverts                         | Cost of advertising slots after 9pm become very expensive                             |                                                            |
|                                                          |                                                                      | Continued advertising of salty products                         |                                                                                       |                                                            |
|                                                          |                                                                      | Increased advertising for food delivery companies               |                                                                                       |                                                            |



1  
2  
3  
4  
5  
6  
7  
8  
9  
10  
11  
12  
13  
14  
15  
16  
17  
18  
19  
20  
21  
22  
23  
24  
25  
26  
27  
28  
29  
30  
31  
32  
33  
34  
35  
36  
37  
38  
39  
40  
41  
42  
43  
44  
45  
46

| Workshop 1 (non-industry)                 | Workshop 2 (non-industry)                                      | Workshop 3 (non-industry)                                               | Workshop 4 (industry)                                                                                                                                        | Final map                                                 |
|-------------------------------------------|----------------------------------------------------------------|-------------------------------------------------------------------------|--------------------------------------------------------------------------------------------------------------------------------------------------------------|-----------------------------------------------------------|
| Balloon effect                            | Change in type of advertising                                  | Increase in exposure to online, personalised/targeted advertising       | Difficult to market fruit and veg as part of a meal (which may include HFSS e.g., Christmas) - depends on how regulation is specified e.g. 'hero' ingredient | <b>Exposure to unregulated marketing of HFSS products</b> |
| Increase in sponsorship                   | Increase in non-regulated marketing (e.g., sports sponsorship) | Advertising continues to appeal to children                             | Not able to show healthy food in context                                                                                                                     |                                                           |
| 'Unrelated' advertising e.g., CSR         | Increase in in-store tasting                                   | Companies able to bypass enforcement                                    | Not able to show 'treat' foods in appropriate                                                                                                                |                                                           |
| Loopholes                                 | More price reductions especially for large companies           | Increase in online advertising (hard to measure)                        | Hard to make healthy products desirable                                                                                                                      |                                                           |
| Location based promotions                 | Increase in advertising among small companies (not franchises) | Companies able to bypass loopholes online                               | Focus diverted away from reformulation if unable to advertise                                                                                                |                                                           |
| Increase in price promotions              | Changes nature of branding information                         | Shift in how sugary drinks are advertised (alcohol alternatives)        | Not able to advertise cooking/food culture                                                                                                                   |                                                           |
| Brand awareness reduces                   | Increase in brand advertising among large brands               | Reduction in offline advertising (e.g., TV, print - easy to measure)    | Find alternative ways to market existing products (no product change)                                                                                        |                                                           |
| Brand engagement/identification decreases |                                                                | Continued advertising of products in large portions e.g., fried chicken | Innovation in targeting adults with marketing                                                                                                                |                                                           |
| Brand association decreases               |                                                                | Advertising HFSS by stealth                                             |                                                                                                                                                              |                                                           |
|                                           |                                                                | Increase in other forms of price promotion?                             |                                                                                                                                                              |                                                           |
|                                           |                                                                | Regulation unable to capture what is appealing to children              |                                                                                                                                                              |                                                           |
|                                           | Better wellbeing (e.g., reduced weight stigma)                 |                                                                         |                                                                                                                                                              | <b>Health</b>                                             |
| Alternative evidence of efficacy          | Food industry resists other interventions                      | Industry able to lobby against policies in future                       |                                                                                                                                                              | <b>Lobbying against further interventions</b>             |

| Workshop 1 (non-industry)                | Workshop 2 (non-industry)                                                     | Workshop 3 (non-industry)                                               | Workshop 4 (industry)                                                                                         | Final map                                          |
|------------------------------------------|-------------------------------------------------------------------------------|-------------------------------------------------------------------------|---------------------------------------------------------------------------------------------------------------|----------------------------------------------------|
| Discredit public health evidence         |                                                                               |                                                                         |                                                                                                               |                                                    |
| Concentration of HFSS market             | Retain market share                                                           | Large companies continue to dominate food system                        |                                                                                                               | <b>Market share</b>                                |
|                                          |                                                                               | Atomisation?                                                            |                                                                                                               |                                                    |
|                                          |                                                                               | Continued advertising of products in large portions e.g., fried chicken | No incentive to market smaller products/portion sizes e.g., because based on NPM, content per 100g            | <b>Portion size</b>                                |
| Change in affordability                  | More price reductions especially for large companies                          | Increase in other forms of price promotion?                             | Increase in product prices                                                                                    | <b>Price</b>                                       |
|                                          |                                                                               |                                                                         | Harder to run value deals e.g., price matching competitors                                                    |                                                    |
| Diversification of non-HFSS markets      | More product innovation (NPD)                                                 | NPD for non-HFSS products                                               | Could lead to NPD for exempt categories                                                                       | <b>Product innovation for unregulated products</b> |
| Positive opportunity in supply chain     | Reformulation of HFSS products in regulated categories to fit below threshold | Reformulation towards salty products                                    | Some categories of food are hard to change                                                                    |                                                    |
| Brand diversification                    |                                                                               | Reduced incentive to produce HFSS                                       | NPD [and marketing] becomes difficult                                                                         |                                                    |
| New product development (reformulation?) |                                                                               | Increased incentive to produce artificially sweetened products          | No incentive to change products to meet threshold i.e., binary assessment is unattainable for some categories |                                                    |
|                                          |                                                                               |                                                                         | No change or incentive to change for exempt categories                                                        |                                                    |
|                                          |                                                                               |                                                                         | Innovation in product and ingredient development                                                              |                                                    |
| Change in public perception              |                                                                               |                                                                         |                                                                                                               |                                                    |
| Awareness of regulation                  |                                                                               |                                                                         |                                                                                                               |                                                    |
| Higher awareness of harms                |                                                                               |                                                                         |                                                                                                               |                                                    |
| <b>Public awareness</b>                  |                                                                               |                                                                         |                                                                                                               |                                                    |

1  
2  
3  
4  
5  
6  
7  
8  
9  
10  
11  
12  
13  
14  
15  
16  
17  
18  
19  
20  
21  
22  
23  
24  
25  
26  
27  
28  
29  
30  
31  
32  
33  
34  
35  
36  
37  
38  
39  
40  
41  
42  
43  
44  
45  
46

| Workshop 1 (non-industry)                                           | Workshop 2 (non-industry)                                                                 | Workshop 3 (non-industry)                                  | Workshop 4 (industry)                                                                                                 | Final map                                   |
|---------------------------------------------------------------------|-------------------------------------------------------------------------------------------|------------------------------------------------------------|-----------------------------------------------------------------------------------------------------------------------|---------------------------------------------|
| Better perception of eating healthy especially among younger people |                                                                                           |                                                            |                                                                                                                       |                                             |
|                                                                     | Public support for interventions                                                          |                                                            | Difficult to articulate to the public                                                                                 | <b>Public support</b>                       |
|                                                                     | Public opposition/unease to interventions                                                 |                                                            |                                                                                                                       |                                             |
| Change in purchasing                                                | Decision to purchase HFSS product (who? Adult vs child)                                   | Reduced purchasing/consumption of HFSS                     | Reduced purchases of HFSS                                                                                             | <b>Purchases of HFSS regulated products</b> |
|                                                                     | Fewer purchases of HFSS food                                                              |                                                            |                                                                                                                       |                                             |
|                                                                     | Retain sales of HFSS                                                                      |                                                            |                                                                                                                       |                                             |
| Change in purchasing                                                | Increase in sales of products in 'non-banned' healthier categories e.g., savoury crackers | Increased availability of salty products                   |                                                                                                                       | <b>Purchases of unregulated products</b>    |
|                                                                     |                                                                                           | Increase in production/sales of low or no alcoholic drinks |                                                                                                                       |                                             |
| Durability of interventions                                         | Retailers support interventions                                                           | Volume-based price promotion restrictions                  | Wider political landscape (e.g., Brexit) other burdensome policies (e.g., plastic tax, covid)                         |                                             |
| Interact with other aspects of DPH policy                           |                                                                                           | Location-based price promotion restrictions                | Volume and location price policies                                                                                    |                                             |
| Location based promotions                                           |                                                                                           | Other restrictions warranted                               | Unnecessarily complicated landscape of policies to meet the same goal = costly                                        |                                             |
| Covid-19 raised awareness                                           |                                                                                           | Reinforces reformulation as 'solution'                     | Potential for a level playing field (if clear guidance)                                                               | <b>Regulatory and political landscape</b>   |
| Current events in public health                                     |                                                                                           | Tax breaks/ad subsidy for SMEs producing healthy foods (?) | Insufficient warning to respond                                                                                       |                                             |
| Volume based promotions restrictions                                |                                                                                           |                                                            | Difficult to implement e.g., differences in affected categories                                                       |                                             |
|                                                                     |                                                                                           |                                                            | Packaged products not able to go at the front of store based on conditions for restrictions (packaged/HFSS/product in |                                             |

| Workshop 1 (non-industry)                                                | Workshop 2 (non-industry)                                      | Workshop 3 (non-industry)                                        | Workshop 4 (industry)                                                                       | Final map                        |
|--------------------------------------------------------------------------|----------------------------------------------------------------|------------------------------------------------------------------|---------------------------------------------------------------------------------------------|----------------------------------|
|                                                                          |                                                                |                                                                  | scope) - may relate to available nutritional info)                                          |                                  |
| Legal precedent                                                          | Influences implementation of other interventions               | Influences capacity to make future policies for HFSS             |                                                                                             | <b>Regulatory precedent</b>      |
| Decision norming (more regs seem possible)                               |                                                                | Confusion for future policies for HFSS/loss of objectivity       |                                                                                             |                                  |
| Empower policymakers                                                     |                                                                | Increase in government sanctioned digital verification           |                                                                                             |                                  |
|                                                                          |                                                                | Reduced risk of various NCDs                                     |                                                                                             | <b>Risk of diet-related NCDs</b> |
| Fewer social connotations around food                                    | Change in social norms around food                             | Influences social norms e.g., social cooling                     |                                                                                             | <b>Social norms around food</b>  |
| Changes in social norms                                                  | Family dynamics, individual dynamics                           | Reduction in normalisation of HFSS                               |                                                                                             |                                  |
| Change in engagement with foods                                          |                                                                | Limits changes to food norms                                     |                                                                                             |                                  |
| Associations with young people change (e.g., aspirational)               |                                                                | Greater influence on social/food norms                           |                                                                                             |                                  |
|                                                                          |                                                                |                                                                  |                                                                                             | <b>Society</b>                   |
| Changes link between food and personal identity                          | Shift towards food citizenship mindset                         |                                                                  |                                                                                             | <b>Societal shifts</b>           |
| Different retail environment                                             | Reduce consumerism mindset                                     |                                                                  |                                                                                             |                                  |
| Less time spent on social media                                          | Change in culture                                              |                                                                  |                                                                                             |                                  |
| Polarisation                                                             |                                                                |                                                                  |                                                                                             |                                  |
| Small producers meeting nutritional criteria/ambient food increase sales | Accessibility influences purchases                             | Increase in advertising from SMEs? If they can afford to compete | Companies with small portfolio of HFSS products most affected? e.g., chocolate              | <b>Changes vary by...</b>        |
| Different price sensitivity                                              | Increase in advertising among small companies (not franchises) | Sustained sales of HFSS from SMEs                                | Those already experiencing overweight may be more likely to benefit (higher base exposure?) |                                  |
| Importance of brand amplified for low-income people                      |                                                                | Effects differ by age?                                           | Disproportionately affects low-income people                                                |                                  |

1  
2  
3  
4  
5  
6  
7  
8  
9  
10  
11  
12  
13  
14  
15  
16  
17  
18  
19  
20  
21  
22  
23  
24  
25  
26  
27  
28  
29  
30  
31  
32  
33  
34  
35  
36  
37  
38  
39  
40  
41  
42  
43  
44  
45  
46

| Workshop 1 (non-industry)                                                 | Workshop 2 (non-industry) | Workshop 3 (non-industry)                   | Workshop 4 (industry) | Final map |
|---------------------------------------------------------------------------|---------------------------|---------------------------------------------|-----------------------|-----------|
| Importance of brand amplified for young people                            |                           | Socioeconomic position                      |                       |           |
| Different groups more susceptible e.g., those exposed                     |                           | Adolescents more susceptible to advertising |                       |           |
| Differential effects by socioeconomic position                            |                           |                                             |                       |           |
| Baseline differences in health (socioeconomic gradient)                   |                           |                                             |                       |           |
| Reduce health inequalities                                                |                           |                                             |                       |           |
| Distinguish effects by brand strength e.g., better for established brands |                           |                                             |                       |           |

Notes: HFSS: high fat, salt and sugar; NCD: non-communicable disease; NPD: new product development; NPM: Nutrient Profile Model; SME: small and medium enterprises.

Appendix 1: Consolidated criteria for reporting qualitative studies (COREQ): 32-item checklist

| No.                                            | Item                                     | Guide questions/description                                                                                                                               | Page #     |
|------------------------------------------------|------------------------------------------|-----------------------------------------------------------------------------------------------------------------------------------------------------------|------------|
| <b>Domain 1: Research team and reflexivity</b> |                                          |                                                                                                                                                           |            |
| Personal characteristics                       |                                          |                                                                                                                                                           |            |
| 1.                                             | Interviewer/facilitator                  | Which author/s conducted the interviews or focus groups?                                                                                                  | 6          |
| 2.                                             | Credentials                              | What were the researcher's credentials? e.g., PhD, MD                                                                                                     | Title page |
| 3.                                             | Occupation                               | What was their occupation at the time of the study?                                                                                                       | Title page |
| 4.                                             | Gender                                   | Was the researcher male or female?                                                                                                                        | See note   |
| 5.                                             | Experience and training                  | What experience or training did the researcher have?                                                                                                      | 6          |
| Relationship with participants                 |                                          |                                                                                                                                                           |            |
| 6.                                             | Relationship established                 | Was a relationship established prior to study commencement?                                                                                               | 6          |
| 7.                                             | Participant knowledge of the interviewer | What did the participants know about the research? e.g., personal goals, reasons for doing the research                                                   | 6          |
| 8.                                             | Interviewer characteristics              | What characteristics were reported about the interviewer/facilitator? e.g., bias, assumptions, reasons and interests in the research topic                | N/A        |
| <b>Domain 2: study design</b>                  |                                          |                                                                                                                                                           |            |
| Theoretical framework                          |                                          |                                                                                                                                                           |            |
| 9.                                             | Methodological orientation and Theory    | What methodological orientation was stated to underpin the study? e.g., grounded theory, discourse analysis, ethnography, phenomenology, content analysis | 6          |
| Participant selection                          |                                          |                                                                                                                                                           |            |
| 10.                                            | Sampling                                 | How were the participants selected? e.g., purposive, convenience, consecutive, snowball                                                                   | 6          |
| 11.                                            | Method of approach                       | How were participants approached? e.g., face-to-face, telephone, mail, email                                                                              | 6          |
| 12.                                            | Sample size                              | How many participants were in the study?                                                                                                                  | 8          |
| 13.                                            | Non-participation                        | How many people refused to participate or dropped out? Reasons?                                                                                           | N/A        |
| Setting                                        |                                          |                                                                                                                                                           |            |
| 14.                                            | Setting of data collection               | Where was the data collected? e.g., home, clinic, workplace                                                                                               | 6-7        |
| 15.                                            | Presence of non-participants             | Was anyone else present besides the participants and researchers?                                                                                         | N/A        |
| 16.                                            | Description of sample                    | What are the important characteristics in the sample? e.g., demographic data, date                                                                        | 8          |
| Data collection                                |                                          |                                                                                                                                                           |            |
| 17.                                            | Interview guide                          | Were questions, prompts, guides provided by the authors? Was it pilot tested?                                                                             | 6          |
| 18.                                            | Repeat interviews                        | Were repeat interviews carried out? If yes, how many?                                                                                                     | N/A        |
| 19.                                            | Audio/visual recording                   | Did the research use audio or visual recording to collect the data?                                                                                       | 7          |
| 20.                                            | Field notes                              | Were field notes made during and/or after the interview or focus group?                                                                                   | 7          |
| 21.                                            | Duration                                 | What was the duration of the interviews or focus group?                                                                                                   | 6          |
| 22.                                            | Data saturation                          | Was data saturation discussed?                                                                                                                            | 6          |
| 23.                                            | Transcripts returned                     | Were transcripts returned to participants for comment and/or correction?                                                                                  | 8          |

| No.                                    | Item                           | Guide questions/description                                                                                                      | Page # |
|----------------------------------------|--------------------------------|----------------------------------------------------------------------------------------------------------------------------------|--------|
| <b>Domain 3: analysis and findings</b> |                                |                                                                                                                                  |        |
| Data analysis                          |                                |                                                                                                                                  |        |
| 24.                                    | Number of data coders          | How many data coders coded the data?                                                                                             | N/A    |
| 25.                                    | Description of the coding tree | Did authors provide a description of the coding tree?                                                                            | N/A    |
| 26.                                    | Derivation of themes           | Were themes identified in advance or derived from the data?                                                                      | N/A    |
| 27.                                    | Software                       | What software, if applicable, was used to manage the data?                                                                       | 6-7    |
| 28.                                    | Participant checking           | Did participants provide feedback on the findings?                                                                               | 8      |
| Reporting                              |                                |                                                                                                                                  |        |
| 29.                                    | Quotations presented           | Were participant quotations presented to illustrate the themes/findings? Was each quotation identified? e.g., participant number | N/A    |
| 30.                                    | Data and findings consistent   | Was there consistency between the data presented and the findings?                                                               | 9      |
| 31.                                    | Clarity of major themes        | Were major themes clearly presented in the findings?                                                                             | N/A    |
| 32.                                    | Clarity of minor themes        | Is there a description of diverse cases or discussion of minor themes?                                                           | N/A    |

**Taken from:** Tong A, Sainsbury P, Craig J. Consolidated criteria for reporting qualitative research (COREQ): a 32-item checklist for interviews and focus groups. *Int J Qual Health Care*. 2007;19(6):349-357. doi:10.1093/intqhc/mzm042

**Question on gender omitted in response to recent update:** Albury C, Pope C, Shaw S, et al. Gender in the consolidated criteria for reporting qualitative research (COREQ) checklist. *International Journal for Quality in Health Care*. 2021;33(4):2021. doi:10.1093/intqhc/mzab12

# BMJ Open

## Exploring the potential impact of the proposed UK TV and online food advertising regulations: a concept mapping study

|                                 |                                                                                                                                                                                                                                                                                                                                                                                                                                        |
|---------------------------------|----------------------------------------------------------------------------------------------------------------------------------------------------------------------------------------------------------------------------------------------------------------------------------------------------------------------------------------------------------------------------------------------------------------------------------------|
| Journal:                        | <i>BMJ Open</i>                                                                                                                                                                                                                                                                                                                                                                                                                        |
| Manuscript ID                   | bmjopen-2021-060302.R1                                                                                                                                                                                                                                                                                                                                                                                                                 |
| Article Type:                   | Original research                                                                                                                                                                                                                                                                                                                                                                                                                      |
| Date Submitted by the Author:   | 05-Apr-2022                                                                                                                                                                                                                                                                                                                                                                                                                            |
| Complete List of Authors:       | Forde, Hannah; MRC Epidemiology Unit<br>Boyland, Emma; University of Liverpool Institute of Population Health, Department of Psychology<br>Scarborough, Peter; University of Oxford, Nuffield Department of Population Health; NIHR Oxford Biomedical Research Centre<br>Smith, Richard ; University of Exeter Medical School, Institute of Health Research<br>White, Martin; MRC Epidemiology Unit<br>Adams, J; MRC Epidemiology Unit |
| <b>Primary Subject Heading</b>: | Public health                                                                                                                                                                                                                                                                                                                                                                                                                          |
| Secondary Subject Heading:      | Global health, Health policy, Qualitative research                                                                                                                                                                                                                                                                                                                                                                                     |
| Keywords:                       | PUBLIC HEALTH, NUTRITION & DIETETICS, QUALITATIVE RESEARCH                                                                                                                                                                                                                                                                                                                                                                             |
|                                 |                                                                                                                                                                                                                                                                                                                                                                                                                                        |

SCHOLARONE™  
Manuscripts





I, the Submitting Author has the right to grant and does grant on behalf of all authors of the Work (as defined in the below author licence), an exclusive licence and/or a non-exclusive licence for contributions from authors who are: i) UK Crown employees; ii) where BMJ has agreed a CC-BY licence shall apply, and/or iii) in accordance with the terms applicable for US Federal Government officers or employees acting as part of their official duties; on a worldwide, perpetual, irrevocable, royalty-free basis to BMJ Publishing Group Ltd ("BMJ") its licensees and where the relevant Journal is co-owned by BMJ to the co-owners of the Journal, to publish the Work in this journal and any other BMJ products and to exploit all rights, as set out in our [licence](#).

The Submitting Author accepts and understands that any supply made under these terms is made by BMJ to the Submitting Author unless you are acting as an employee on behalf of your employer or a postgraduate student of an affiliated institution which is paying any applicable article publishing charge ("APC") for Open Access articles. Where the Submitting Author wishes to make the Work available on an Open Access basis (and intends to pay the relevant APC), the terms of reuse of such Open Access shall be governed by a Creative Commons licence – details of these licences and which [Creative Commons](#) licence will apply to this Work are set out in our licence referred to above.

Other than as permitted in any relevant BMJ Author's Self Archiving Policies, I confirm this Work has not been accepted for publication elsewhere, is not being considered for publication elsewhere and does not duplicate material already published. I confirm all authors consent to publication of this Work and authorise the granting of this licence.

1  
2  
3  
4 1 **Exploring the potential impact of the proposed UK TV and online food**  
5  
6 2 **advertising regulations: a concept mapping study**  
7

8 3 **Hannah Forde<sup>a\*</sup>, Emma Boyland<sup>b</sup>, Peter Scarborough<sup>c,d</sup>, Richard Smith<sup>e</sup>, Martin White<sup>a</sup>, Jean Adams<sup>a</sup>**  
9

10 4 <sup>a</sup> MRC Epidemiology Unit, University of Cambridge School of Clinical Medicine, Box 285 Institute of  
11 Metabolic Science, Cambridge Biomedical Campus, Cambridge, CB2 0QQ  
12 5

13 6 <sup>b</sup> Department of Psychology, Institute of Population Health, University of Liverpool, Eleanor Rathbone  
14 Building, Bedford Street South, Liverpool, L69 7ZA  
15 7

16 8 <sup>c</sup> Nuffield Department of Population Health, University of Oxford, Old Road Campus, Roosevelt Drive,  
17 Headington, Oxford, OX3 7LF  
18 9

19 10 <sup>d</sup> NIHR Oxford Biomedical Research Centre, The Joint Research Office, Second Floor, OUH Cowley  
20 Unipart House Business Centre, Garsington Road, Oxford, OX4 2PG  
21 11

22 12 <sup>e</sup> Medical School Building, College of Medicine and Health, University of Exeter, St Luke's Campus,  
23 Heavitree Road, Exeter, EX1 2LU  
24 13

25 14 \*Correspondence to Hannah Forde: [hf332@medschl.cam.ac.uk](mailto:hf332@medschl.cam.ac.uk)  
26 15

27 15 **MAIN MANUSCRIPT WORD COUNT: 5,555**  
28  
29  
30  
31  
32  
33  
34  
35  
36  
37  
38  
39  
40  
41  
42  
43  
44  
45  
46  
47  
48  
49  
50  
51  
52  
53  
54  
55  
56  
57  
58  
59  
60

## 16 **ABSTRACT**

17 **Objectives** In July 2020 the UK Government announced an intention to restrict advertisements for  
18 products high in fat, salt or sugar on live broadcast, catch-up and on-demand television before 9pm;  
19 and paid for online advertising. As no other jurisdiction has implemented similar regulations, there is  
20 no empirical evidence about how they might perturb the food system. To guide the regulations'  
21 implementation and evaluation, we aimed to develop a concept map to hypothesise their potential  
22 consequences for the commercial food system, health and society.

23 **Methods** We used adapted group concept mapping in four virtual workshops with food marketing and  
24 regulation experts across academia, civil society, government organisations, and industry (N=14),  
25 supported by Miro software. We merged concepts derived from the four workshops to develop a  
26 master map and then invited feedback from participants via email to generate a final concept map.

27 **Results** The concept map shows how the reactions of stakeholders to the regulations may reinforce  
28 or undermine the impact on the commercial food system, health and society. The map shows  
29 adaptations made by stakeholders that could reinforce, or undermine, positive impacts on public  
30 health. It also illustrates potential weaknesses in the design and implementation of the regulations  
31 that could result in little substantial difference to public health.

## 32 **Conclusions**

33 Prior to the regulations' initial implementation or subsequent iterations, they could be altered to  
34 maximise the potential for reinforcing adaptations, minimise the potential for undermining  
35 adaptations, and ensure they cover a wide range of advertising opportunities and foods. The concept  
36 map will also inform the design of an evaluation of the regulations and could be used to inform the  
37 design and evaluation of similar regulations elsewhere.

## 38 **Strengths and limitations of this study**

- 39 • By including a diverse range of experts, we developed the first comprehensive articulation of  
40 the potential pathways through which new advertising regulations may impact on the  
41 commercial food system, health and society.
- 42 • Holding the workshops online may have facilitated greater attendance, particularly as we  
43 employed techniques to minimise the limitations of online data collection.
- 44 • Timing the workshops after sufficient details were known about the regulations allowed for a  
45 meaningful discussion about their impact but with enough time for the study's findings to feed  
46 into the regulations' design.

- 1  
2  
3 47 • Though we did not aim to achieve saturation in this study, we found it difficult to recruit  
4 participants from industry.  
5 48  
6  
7 49 • We necessarily invited more individuals than those who ultimately participated, which may  
8 affect the transferability of the study's findings.  
9 50  
10  
11  
12  
13  
14  
15  
16  
17  
18  
19  
20  
21  
22  
23  
24  
25  
26  
27  
28  
29  
30  
31  
32  
33  
34  
35  
36  
37  
38  
39  
40  
41  
42  
43  
44  
45  
46  
47  
48  
49  
50  
51  
52  
53  
54  
55  
56  
57  
58  
59  
60
- Though we did not aim to achieve saturation in this study, we found it difficult to recruit participants from industry.
  - We necessarily invited more individuals than those who ultimately participated, which may affect the transferability of the study's findings.

For peer review only

## 51 INTRODUCTION

52 The World Health Organization (WHO) recommends that member states limit children's exposure to  
53 marketing for less healthy foods.[1] The recommendation reflects evidence that marketing influences  
54 food preferences and consumption, both at an individual (micro-level impacts)[2,3] and societal level  
55 (macro-level impacts).[4] Marketing has been defined as "the activity, set of institutions, and  
56 processes for creating, communicating, delivering, and exchanging offerings that have value for  
57 customers, clients, partners, and society at large".[5] Marketing is exerted through a range of  
58 activities, including those related to the product, its place, price and promotion.[6] Promotion includes  
59 building games around products (advergaming), social media 'influencers', and paid for advertising in  
60 any medium. Products high in fat, salt, or sugar (HFSS) are disproportionately advertised in the UK,  
61 with only 2.5% of total food and soft drink advertising spend going towards fruit and vegetables in  
62 2020.[7] Though the causal pathways between advertising and obesity are likely to be complex,[8] it  
63 is estimated that 6.4% (95% confidence interval (CI): 2.0-13.8) of UK childhood obesity and 5.0% (95%  
64 CI: 1.5-10.9) of overweight is attributable to HFSS television advertising alone.[9]

65 To address concerns about the prevalence of childhood obesity, in July 2020 the United Kingdom's  
66 (UK) Government Department of Health and Social Care published an intention to restrict  
67 advertisements for HFSS food and drink products on live broadcast, catch-up and on-demand  
68 television ('TV') before 9pm and paid for online advertising ('online').[10] Current details of these  
69 proposed regulations are summarised in **Box 1**, and though they have passed through the House of  
70 Lords in the Health and Care Bill,[11] details of the regulations may change before they receive Royal  
71 Assent and are implemented. Although these regulations are likely to impact on both TV and online  
72 advertising content that adults see, they have been consistently framed in policy documents as  
73 focusing on tackling childhood obesity. The first government document they were proposed in was a  
74 Childhood Obesity Strategy,[12] and subsequent strategies and policy documents have repeatedly  
75 referred to them in the context of childhood obesity.[10,13] Further, the design of the TV aspect  
76 (banning HFSS adverts from 0530-2100) reflects hours when children are most likely to be watching.

**BOX 1: Regulation details**

*It is expected that two new regulations will be implemented before the end of 2022:*

1. *A ban on advertisements for HFSS products shown on live broadcast TV from 0530-2100 ('TV advertising watershed'), including:*
  - a. *on-demand programme services under the jurisdiction of the UK.*
2. *A ban on online advertisements for HFSS products, including:*
  - a. *Non-UK regulated on-demand programme services;*
  - b. *Social media influencers, commercial text messaging and email, all website advertising, paid-for search listings, preferential listings on price comparison sites, in-game advertisements, in-app advertising, advergames and advertorial, online display and online video.*

*Restrictions will not apply to 'owned media' (online property owned and controlled, usually by a brand), brand advertising, small and medium enterprises (fewer than 250 employees), audio and broadcast radio, business to business (online only), or transactional content.*

*'HFSS' will be defined by the 2004/2005 UK Nutrient Profiling Model and within particular categories from the Sugar Reduction Strategy. Details of the regulations may change in the lead up to implementation.*

*Government will appoint Ofcom as the statutory regulator, who will then appoint a day-to-day regulator (expected to be ASA).[13]*

77 The TV and online regulations proposed for the UK will be some of the most restrictive worldwide,  
 78 and the first to explicitly address paid for online advertising.[14] Overall, 18% of UK advertising spend  
 79 is for TV slots and at least 63% for online slots.[15] Though there has been a recent decline in broadcast  
 80 TV viewing in the UK, average viewing time remains around three hours per day for ages 4 years and  
 81 above.[15] The Covid-19 pandemic has accelerated use of subscription video-on-demand services,  
 82 with viewing of services such as Netflix and Amazon Prime Video almost doubling in 2020 to an  
 83 estimated 1 hour per person per day.[16] Such services would be covered by the proposed online  
 84 regulation rather than the TV one. While the decline in broadcast TV viewing has been more  
 85 pronounced among younger people (for 16-24 year olds down 18%, and for children 4-15 year olds  
 86 down 16% in 2019),[15] this has corresponded with an increase in viewing of subscription video-on-  
 87 demand services among younger people (by 55 minutes to an average of two hours per day between  
 88 April 2019 and April 2020).[16] It has been estimated that a pre-9pm ban on HFSS TV food advertising  
 89 would result in a 4.6 (1.4-9.5)% reduction in childhood obesity and a 3.6 (1.1-7.4)% reduction in  
 90 childhood overweight prevalence.[9] Effects were two-fold greater in the least compared to the most  
 91 affluent social groups and would likely be amplified by comparable restrictions on online food

1  
2  
3 92 promotion.[9] The ultimate results of such a regulation were predicted to depend on how HFSS  
4  
5 93 advertising patterns change in response.[9] Though less is known about the potential effects of an  
6  
7 94 online ban, emerging evidence indicates that online marketing techniques (e.g., use of social media  
8  
9 95 influencers) may be particularly pervasive and persuasive.[17–19]

10  
11 96 Few evaluations of such food advertising restrictions have been conducted worldwide,[14] partly  
12  
13 97 because there have been few comparable regulations. There are also challenges to evaluating this  
14  
15 98 type of intervention that is delivered to whole populations and so is impractical to subject to  
16  
17 99 experimental evaluation techniques such as randomised controlled trials.[20] Furthermore, the  
18  
19 100 commercial food sector exhibits characteristics of a complex adaptive system.[21] Adaptations made  
20  
21 101 by stakeholders residing in the system that is regulated may lead to both intended and unintended  
22  
23 102 consequences that ultimately impact on the overall effectiveness of regulations.[21] The ‘balloon  
24  
25 103 effect’ proposes that restrictions on one type of marketing can lead to increases in others,[22] as  
26  
27 104 companies and other aspects of the food system adapt. Articulating these possible adaptations and  
28  
29 105 their potential consequences should help refine details of the regulations before implementation.  
30  
31 106 Understanding possible adaptations and consequences should also help inform the design of any  
32  
33 107 evaluation.

34  
35 108 Some other countries are following a similar path of legislation in this realm – though more often  
36  
37 109 through industry self-regulation [23–27] – emphasising the need to develop generalisable evidence  
38  
39 110 about the impact of the UK regulations. To maximise the applicability of evaluation findings to  
40  
41 111 policymakers outside of the UK, it is helpful for evaluators to test theories as well as evaluate  
42  
43 112 interventions.[28] Theory-driven evaluation first requires the development and clear articulation of  
44  
45 113 program theory.[29] Concept mapping is an approach particularly useful for public health researchers  
46  
47 114 interested in developing theory.[30] A concept map is a “diagram of proposed relationships among a  
48  
49 115 set of concepts....about a particular question....or topic”.[31] Concept maps can be used to help  
50  
51 116 organise ideas, demarcate an area of interest and plan evaluations. Group concept mapping is a  
52  
53 117 structured approach involving group work that is flexible to many public health contexts.[32]

## 54 118 **Objectives**

55  
56 119 In this study, we used an approach inspired by group concept mapping to develop a concept map of  
57  
58 120 how the new TV and online advertising regulations may impact on the commercial food system, health  
59  
60 121 and society. We aimed to describe how the regulations may interact with the food system so that  
122  
123 122 evaluations of the regulations can be grounded in clearly articulated theory, and so that adaptations  
to the regulations that could improve the health impact can be identified before implementation.

## 124 **METHODS**

### 125 **Study design**

126 We created a concept map of the potential pathways through which the regulations may impact on  
127 the commercial food system, health and society. By 'food system' we mean the interdependent  
128 network of entities involved in agriculture and fisheries, food processing and production, storage and  
129 distribution, wholesaling and retailing, and preparation and marketing of raw, processed and ready to  
130 eat foods.[21] By 'society', we mean the wider social system in which the food system is embedded.  
131 We developed the map using an adapted version of a group concept mapping method in four  
132 workshops.[32] The study reporting adheres to the Consolidated Criteria for Reporting Qualitative  
133 Research (COREQ) (**Appendix 1**),[33] but recognises proposed amendments relating to gender.[34]

### 134 **Participant recruitment**

135 Workshop participants were recruited from academia, civil society, government organisations and  
136 industry (e.g., food industry, media, advertising). Individuals were eligible for inclusion if they had  
137 professional knowledge and experience of food marketing regulation within their sector and were  
138 based in the UK. We identified individuals from our existing contacts in these sectors and by searching  
139 the websites of relevant organisations. In total, 63 individuals were invited by email to take part in the  
140 study (8 from academia, 15 from civil society, 11 from government organisations, and 29 from  
141 industry). We aimed to recruit up to 20 individuals, approximately evenly distributed across the  
142 participant groups. As we were not aiming to reach 'saturation',[35] we decided on the number of  
143 people to recruit to the study pragmatically, based on the resources available to us but allowing for  
144 sufficient breadth.

145 Participants from industry attended a separate workshop to those from academia, civil society and  
146 government organisations due to the potential for conflicts of interests between sectors. We set a  
147 limit of 10 participants per workshop in addition to the facilitators (JA and HF, who both had qualitative  
148 research experience, e.g., [36,37]), which is considered a manageable total number of participants to  
149 permit dialogue and engagement.[32] Workshops were arranged around participants' availability in  
150 July and August 2021 and lasted 2 hours each.

### 151 **Data collection**

152 Building on previous work that has used group concept mapping to inform the design of evaluations  
153 of population health interventions,[38] we used the first three steps of group concept mapping  
154 (preparation, generation and structuring)[32] and added a fourth (reflection). The first three steps  
155 were achieved in the workshops, and the final step was achieved using an online feedback form. We



1  
2  
3 156 held the workshops on Zoom, an online videoconferencing software (<https://zoom.us/>) to minimise  
4  
5 157 time demands on participants and as data collection took place during COVID-19 restrictions. In the  
6  
7 158 workshops, we used a combination of pre-piloted Microsoft PowerPoint slides and Miro software  
8  
9 159 (<https://miro.com/>) to provide instructions to participants and visualise their contributions as they  
10  
11 160 were made, respectively. Our data consisted of screenshots of maps as they developed, the map from  
12  
13 161 each workshop, audio recordings of the workshops, and post-workshop feedback returned through  
14  
15 162 an online form. Workshops were held under the Chatham House Rule[39]: participants were told they  
16  
17 163 could use the information discussed in the workshops, but they could not reveal the identity or  
18  
19 164 affiliation of other participants. **Figure 1** summarises the method used to develop the final concept  
20  
21 165 map.

22  
23 166  
24  
25  
26  
27  
28  
29  
30  
31  
32  
33  
34  
35  
36  
37  
38  
39  
40  
41  
42  
43  
44  
45  
46  
47  
48  
49  
50  
51  
52  
53  
54  
55  
56  
57  
58  
59  
60

INSERT FIGURE 1 HERE

### 167 Preparation

168 Preparation entailed setting out the aims and processes of the workshop and agreeing the focus area  
169 of the map.[32] At the beginning of each workshop, the workshop facilitators introduced the aims and  
170 processes. They reminded participants of the intervention details, the withdrawal process and that  
171 the workshops were being recorded. The facilitators proposed that the focus area was “what are the  
172 potential pathways through which the intervention might impact on health, the commercial food  
173 system and society?”. Participants were invited to help refine this during a discussion of approximately  
174 5 minutes.

### 175 Generation

176 Generation is a divergent process where participants individually brainstorm a long list of responses  
177 to the focus area and consider the relative importance of each response.[32] Participants were given  
178 around 10 minutes to independently generate a list of as many responses as possible to the refined  
179 focus area, including pathways to both positive and negative impacts arising from the regulations.

### 180 Structuring

181 Structuring is a convergent process where participants organise and critically reflect on ideas and  
182 relationships between concepts.[32] For approximately 60 minutes, participants were asked in turn  
183 to contribute responses to the focus area from their individual brainstorming in order of relative  
184 importance. These were structured and visualised in real-time using Miro, which was shared on-screen  
185 with participants, with new concepts and relationships added to a draft map as participants suggested  
186 them (see **Figure 2**). Once all responses were included, participants were invited to reflect on the map,  
187 adding additional concepts and relationships as required. We adopted an inclusive approach to adding

1  
2  
3 188 concepts and relationships to maps, including everything mentioned and not deleting anything  
4  
5 189 previously added.

6  
7 190 INSERT FIGURE 2 HERE

8  
9 191 Reflection

10  
11  
12 192 After the workshops, we merged the map from each workshop into one 'master' map. We used a  
13  
14 193 method inspired by those employed in other mapping projects.[40] First, HF charted all concepts in  
15  
16 194 the maps into a Microsoft Excel sheet, and similar or identical concepts across the maps were grouped  
17  
18 195 and refined into simplified concepts and accompanying descriptions. Second, these refined concepts  
19  
20 196 were mapped in a way that corresponded with pathways depicted in the four separate maps. Concepts  
21  
22 197 not immediately fitting anywhere were placed to the side for further deliberation with JA. As we took  
23  
24 198 an inclusive approach, all concepts from the individual maps contributed to the master map. The  
25  
26 199 master map was discussed with the wider research team (EB, PS, MW, RS) and steering committee,  
27  
28 200 prompting some minor changes but notably, no areas of significant disagreement.

29  
30 201 We then circulated the master map to all workshop participants by email. The email contained a link  
31  
32 202 to an online form issued via REDCap (<https://www.project-redcap.org/>) that asked questions about  
33  
34 203 the map to seek suggested changes. We used the suggestions to produce a final concept map.

### 35 204 **Analysis**

36 205 Beyond merging the maps from each workshop into a master map, no formal analyses were  
37  
38 206 conducted.

### 39 207 **Ethics**

40  
41  
42 208 The study received favourable review from the University of Cambridge School of Humanities and  
43  
44 209 Social Science Research Ethics Committee in June 2021, reference number 21.276. Participants were  
45  
46 210 provided with an information sheet about the study and provided informed consent before joining a  
47  
48 211 workshop using an e-consent form issued via REDCap.

### 49 212 **Patient and public involvement**

50  
51  
52 213 Patients and/or the public were not involved in the design, conduct, reporting or dissemination plans  
53  
54 214 of this research.

## 215 RESULTS

216 From four workshops with a total of 14 participants, we developed a concept map to describe how  
 217 the proposed TV and online advertising regulations may impact on the commercial food system,  
 218 health and society. Here we present the concept map and describe its component concepts.

### 219 Participant characteristics

220 We held four workshops: one with individuals from industry, and three with individuals from  
 221 academia, civil society, and government organisations (see **Table 1**). As the focus was on generating  
 222 the map as a group, we did not collate any demographic information about participants.[40]

223 **Table 1. Sectors included in each workshop**

| Participant sectors per workshop | Workshop 1 | Workshop 2 | Workshop 3 | Workshop 4         | Total |
|----------------------------------|------------|------------|------------|--------------------|-------|
| Academia                         | 2          | 1          | 1          | 0                  | 4     |
| Civil society                    | 2          | 1          | 3          | 0                  | 6     |
| Government organisation          | 0          | 1          | 1          | 0                  | 2     |
| Industry                         | 0          | 0          | 0          | 2                  | 2     |
|                                  |            |            |            | <b>Grand total</b> | 14    |

### 224 Concept map of anticipated adaptations to the regulations

225 The maps produced in each workshop are provided in **Appendix 2**, and they illustrate the nuance in  
 226 focus between workshops. For example, the workshop with industry participants focused more on the  
 227 technical difficulties presented by the regulations than in other workshops. Six workshop participants  
 228 provided feedback on the master map during the reflection stage (academia = 2, civil society = 3,  
 229 government organisation = 1). In response to the feedback, we refined some of the connections  
 230 between concepts (e.g., adding a direct link connecting health and employment), and highlighted the  
 231 regulations to make them more visibly striking.

232 The resultant concept map is presented in **Figure 3**, and it depicts the possible pathways of change  
 233 that could follow the regulations. Colour coding is used to differentiate the groups of reactions to the  
 234 regulations: government, food and beverage companies, public, society and health. Pathways  
 235 depicted are not exhaustive, as it is possible that other links between concepts exist that were not  
 236 captured in the workshops. The map is also accompanied by a list of factors that may modify the  
 237 impact of pathways that it depicts, such as socioeconomic position and company size. The concepts  
 238 contained in each workshop map, and the corresponding concepts they were assigned in the final  
 239 concept map, are provided in **Appendix 3**. Concepts are described in more detail in **Table 2**.

1  
2  
3  
4  
5  
6  
7  
8  
9  
10  
11  
12  
13  
14  
15  
16  
17  
18  
19  
20  
21  
22  
23  
24  
25  
26  
27  
28  
29  
30  
31  
32  
33  
34  
35  
36  
37  
38  
39  
40  
41  
42  
43  
44  
45  
46  
47  
48  
49  
50  
51  
52  
53  
54  
55  
56  
57  
58  
59  
60

240  
241  
242

INSERT FIGURE 3 HERE

For peer review only

243 Table 2. Description of concepts in the concept map

| Statement                                                  | Description                                                                                                                                                                                                                                                                                                                                                                                                           |
|------------------------------------------------------------|-----------------------------------------------------------------------------------------------------------------------------------------------------------------------------------------------------------------------------------------------------------------------------------------------------------------------------------------------------------------------------------------------------------------------|
| <b>Anticipation</b>                                        | Food and drink companies foresee the introduction of the regulations <sup>a</sup> , and possibly other related legislation e.g., volume and location price promotion.                                                                                                                                                                                                                                                 |
| <b>Availability of HFSS products</b>                       | Availability of <u>all</u> HFSS foods and beverages, both within and outside the scope of the regulations <sup>a</sup> , in physical and online shops.                                                                                                                                                                                                                                                                |
| <b>Bodyweight</b>                                          | In terms of Body Mass Index (BMI), overweight or obesity status.                                                                                                                                                                                                                                                                                                                                                      |
| <b>Calorie consumption</b>                                 | Total energy intake of individuals.                                                                                                                                                                                                                                                                                                                                                                                   |
| <b>Child purchasing requests for HFSS products</b>         | Degree to which children make purchasing requests to caregivers for <u>all</u> HFSS products, both within and outside the scope of the regulations <sup>a</sup> .                                                                                                                                                                                                                                                     |
| <b>Commercial food system</b>                              | Interdependent networks of commercial entities involved in agriculture and fisheries, food processing and production, storage and distribution, wholesaling and retailing, and preparation and marketing of raw, processed, and ready to eat foods.[21]                                                                                                                                                               |
| <b>Company engagement with health issues</b>               | Degree to which food and beverage companies orientate their business around public health goals.                                                                                                                                                                                                                                                                                                                      |
| <b>Company profitability</b>                               | A company's ability to make profit.                                                                                                                                                                                                                                                                                                                                                                                   |
| <b>Consumption of regulated HFSS products</b>              | Individual's intake of foods and beverages within the scope of the regulations <sup>a</sup> .                                                                                                                                                                                                                                                                                                                         |
| <b>Consumption of unregulated products</b>                 | Individual's intake of foods and beverages that are not within the scope of the regulations <sup>a</sup> .                                                                                                                                                                                                                                                                                                            |
| <b>Definitions</b>                                         | Information used to define or enforce the regulation <sup>a</sup> , including the UK Nutrient Profiling Model and the food categories from the Sugar Reduction Strategy. Importantly, the regulations <sup>a</sup> cover a group of foods that is different from those covered by other UK dietary public health regulations. Enforcement is based on information provided by companies.                              |
| <b>Demand for regulated HFSS products</b>                  | Public desire to purchase or consume foods and beverages within the scope of the regulations <sup>a</sup> .                                                                                                                                                                                                                                                                                                           |
| <b>Demand for unregulated products</b>                     | Public desire to purchase or consume foods and beverages outside of the scope of the regulations <sup>a</sup> .                                                                                                                                                                                                                                                                                                       |
| <b>Digital surveillance</b>                                | Digital data collated by website to inform regulation <sup>a</sup> enforcement.                                                                                                                                                                                                                                                                                                                                       |
| <b>Employment</b>                                          | Number of people employed in the commercial food system.                                                                                                                                                                                                                                                                                                                                                              |
| <b>Exposure to advertising for unregulated products</b>    | Exposure <sup>b</sup> to adverts for products outside of the scope of the regulations. For foods and beverages, this could be HFSS products within companies' portfolios that are outside of the scope of the regulations, healthier products (e.g., fruit and vegetables), or food delivery companies. Also includes non-food and beverage products and services, but not clear what health impacts they might have. |
| <b>Exposure to advertising for regulated HFSS products</b> | Exposure <sup>b</sup> to advertising for food and beverages within the scope of the regulations <sup>a</sup> .                                                                                                                                                                                                                                                                                                        |

| Statement                                                 | Description                                                                                                                                                                                                                                                                                                                                                                                                                                                     |
|-----------------------------------------------------------|-----------------------------------------------------------------------------------------------------------------------------------------------------------------------------------------------------------------------------------------------------------------------------------------------------------------------------------------------------------------------------------------------------------------------------------------------------------------|
| <b>Exposure to unregulated marketing of HFSS products</b> | Exposure <sup>b</sup> to advertising for <u>all</u> HFSS products on media that are outside of the scope of the regulations <sup>a</sup> . Includes offline advertising (e.g., print media), forms of marketing online that are exempt from the regulations (e.g., in owned media), sponsorship, brand advertising and creative modes of marketing that are hard to capture with regulation.                                                                    |
| <b>Health</b>                                             | Overall health, including and beyond bodyweight and non-communicable diseases (NCDs).                                                                                                                                                                                                                                                                                                                                                                           |
| <b>Lobbying against further interventions</b>             | Activities undertaken by, or on behalf of, food and beverage companies to resist further policy or regulations.                                                                                                                                                                                                                                                                                                                                                 |
| <b>Market share</b>                                       | The size of the total market held by a company. Few companies that each hold a large market share creates a concentrated market.                                                                                                                                                                                                                                                                                                                                |
| <b>Portion size</b>                                       | Size of food and beverage products in grams or calories, or recommended portion size.                                                                                                                                                                                                                                                                                                                                                                           |
| <b>Price</b>                                              | Price of food and beverage products, including price discounts.                                                                                                                                                                                                                                                                                                                                                                                                 |
| <b>Product innovation for unregulated products</b>        | Developing new products that are outside of the scope of the regulations <sup>a</sup> , or reformulating existing products so they are no longer within the scope of the regulations. Could include reformulation using artificial ingredients or developing e.g., saltier products that are currently an exempt category. Some categories of products are easier to change than others, and some companies are better able to respond in this way than others. |
| <b>Public awareness</b>                                   | Degree of public awareness of both the regulations <sup>a</sup> and the problems they are trying to address.                                                                                                                                                                                                                                                                                                                                                    |
| <b>Public support</b>                                     | Degree of public support for the regulations <sup>a</sup> .                                                                                                                                                                                                                                                                                                                                                                                                     |
| <b>Purchases of regulated HFSS products</b>               | Sales (from company perspective) or purchases (from individual perspective) of food and beverage products within the scope of the regulations <sup>a</sup> .                                                                                                                                                                                                                                                                                                    |
| <b>Purchases of unregulated products</b>                  | Sales (from company perspective) or purchases (from individual perspective) of food and beverage products outside of the scope of the regulations <sup>a</sup> .                                                                                                                                                                                                                                                                                                |
| <b>Regulatory and political landscape</b>                 | Wider landscape of regulation and policy, including others relating to marketing (e.g., location and volume price regulations) and COVID-19. The degree to which the regulations <sup>a</sup> harmonise with the wider political and regulatory landscape.                                                                                                                                                                                                      |
| <b>Regulatory precedent</b>                               | Implementation of the regulations <sup>a</sup> serves as precedent for any future regulation.                                                                                                                                                                                                                                                                                                                                                                   |
| <b>Risk of diet-related NCDs</b>                          | Risk of developing NCDs influenced by dietary behaviours.                                                                                                                                                                                                                                                                                                                                                                                                       |
| <b>Social norms around food</b>                           | Implicit or explicit beliefs, attitudes, or behaviours about eating, at both an individual and family level.                                                                                                                                                                                                                                                                                                                                                    |
| <b>Society</b>                                            | The wider social system in which the food system is embedded.                                                                                                                                                                                                                                                                                                                                                                                                   |
| <b>Societal shifts</b>                                    | Exposure <sup>b</sup> to advertising effects social norms and may contribute to societal changes in consumerism and culture.                                                                                                                                                                                                                                                                                                                                    |

244 Notes: BMI = body mass index; HFSS = high fat, salt, and sugar; NCD = Non-communicable disease.

1  
2  
3 245 <sup>a</sup>The regulations apply to online and TV advertising for a subset of HFSS products, defined by the  
4  
5 246 2004 to 2005 UK Nutrient Profiling Model and within particular categories from the Sugar Reduction  
6  
7 247 Strategy. This means there are HFSS products (unregulated HFSS) and non-HFSS products outside  
8  
9 248 of the scope of the regulations.

10  
11  
12  
13 249 <sup>b</sup>Exposure is a function of advertising prevalence, but is also dependent on individual-level factors (e.g.,  
14  
15 250 frequency of media use).

## 17 251 **DISCUSSION**

### 19 252 **Overview of findings**

21 253 Using an adapted group concept mapping method in four expert workshops, we developed a concept  
22  
23 254 map to visualise how the proposed TV and online food advertising regulations may impact on the  
24  
25 255 commercial food system, health and society. The concept map illustrates that the pathways between  
26  
27 256 the regulations and these impact domains will be determined by the reactions of stakeholders.

### 29 257 **Strengths and limitations**

31 258 To our knowledge, this is the first cross-sectoral attempt to explicitly theorise how regulations of this  
32  
33 259 kind may impact on the commercial food system, health and society. Incorporating the views of a  
34  
35 260 range of experts with different perspectives and interests allowed us to create a comprehensive  
36  
37 261 articulation of the ways the regulations may positively or negatively affect public health. As with any  
38  
39 262 qualitative research, our map does not claim to be representative of all views, nor comprehensive, of  
40  
41 263 the wider groups that participants represent.[40] Instead, we intended to sample a diverse range of  
42  
43 264 expert views related to food marketing and its regulation. Including participants from diverse sectors  
44  
45 265 is a strength of the study as it enabled the proposed regulations to be theorised expansively.  
46  
47 266 Nonetheless, it is possible that other concepts and pathways may exist but were not captured by our  
48  
49 267 map.

50  
51 268 We necessarily invited more individuals than those who ultimately participated. The timing of the data  
52  
53 269 collection period was a common reason for non-participation in the workshops, as it coincided with  
54  
55 270 summer and school holidays in the UK, which may have made it difficult for those with child caring  
56  
57 271 responsibilities to attend. To accommodate individuals' other commitments, we held smaller  
58  
59 272 workshops across various times and days. Doing so increased the participation in our study, but it may  
60  
273 have lost some discussion and synergy that larger groups allow.

1  
2  
3 274 We found it difficult to recruit individuals from industry and government organisations. Employees  
4  
5 275 from these sectors rarely have their contact details listed on public-facing websites, unlike those from  
6  
7 276 academia and civil society. Government organisations expressed reluctance to contribute information  
8  
9 277 beyond what was already in the public domain.[41] There may have also been reluctance from  
10  
11 278 industry to engage with our research due to inherent differences between the goals of public health  
12  
13 279 researchers and of the food industry. Including a relatively small number of industry representatives  
14  
15 280 may have limited our final map, and those industry perspectives in our study may be more sympathetic  
16  
17 281 to public health goals than those of the wider sector. However, one of the representatives of industry  
18  
19 282 we did include worked for an umbrella group and so may have a particularly broad perspective to  
20  
21 283 bring. Some of our participants representing other sectors also had previous experience of working  
22  
23 284 with industry. Participants may have also taken part in our study to pursue their own agenda, as  
24  
25 285 industry actors have previously sought to undermine food advertising regulations.[42,43] There are  
26  
27 286 some differences in the contributions made by industry participants compared with non-industry ones  
28  
29 287 (**Appendix 2 and 3**). However, the nature of the workshop content, holding workshops with experts  
30  
31 288 from non-industry sectors, and verifying findings with all participants, left little room for industry  
32  
33 289 interests to overly-dominate our concept map.

34  
35 290 Conducting the workshops in person may have achieved different results, as some participants may  
36  
37 291 have felt more able to share sensitive information in person. However, online workshops widened  
38  
39 292 attendance to those who would have been unable to attend in-person. To avoid some of the potential  
40  
41 293 challenges of collecting data using Zoom, we employed several recommended strategies.[44] This  
42  
43 294 included using screen-sharing and clear greetings to develop rapport, using back-up recording devices,  
44  
45 295 holding facilitator briefings to avoid technical issues, and establishing 'house rules' to ease  
46  
47 296 participants' experiences.[44] To maintain participant engagement, workshop duration was limited to  
48  
49 297 two hours, and primarily focused on capturing concepts rather than exhaustively detailing the  
50  
51 298 pathways between them. Though it may have increased participant fatigue and burden, holding longer  
52  
53 299 workshops may have allowed time to capture additional concepts and pathways. As a form of  
54  
55 300 member-checking,[45] we verified the master map with all workshop participants by email, in a  
56  
57 301 further attempt to ensure the final concept map accurately represented participants' contributions  
58  
59 302 and to allow additional comments.

### 303 **Interpretation of findings**

304 The concept map can be used to illustrate pathways through which the reactions of food and drink  
305 companies may serve or undermine the public health goals of the regulations. Here, we describe three  
306 potential scenarios: (i) adaptations are made to the regulations in ways that reinforce positive impacts



1  
2  
3 307 on public health (see **Figure 4**); (ii) adaptations are made to the regulations in ways that undermine  
4  
5 308 impacts on public health (see **Figure 5**); and (iii) technicalities of the regulations cover too few  
6  
7 309 unhealthy food products and advertising opportunities to make a substantial difference to public  
8  
9 310 health (see **Figure 6**). As it is unlikely all companies will respond uniformly, a combination of the three  
10  
11 311 scenarios may follow the implementation of the regulations.

12 312 Scenario 1: adaptations reinforce positive impacts of the regulations on public health

13  
14 313 INSERT FIGURE 4 HERE

15  
16  
17 314 Companies may reduce their TV and online advertising for regulated HFSS products, as they will have  
18  
19 315 less opportunity for advertisements. Doing so reduces people's exposure to HFSS adverts, which may  
20  
21 316 prompt corresponding reductions in demand, purchases and consumption of the associated HFSS  
22  
23 317 products. Consequently, this will reduce the total number of calories consumed by individuals,  
24  
25 318 improving health outcomes both associated with, and independent of, body weight.

26 319 To make up lost revenue from fewer HFSS product purchases, companies may increase TV and online  
27  
28 320 advertising for their products that are out of the scope of the regulations (e.g., 'spotlighting' low-fat,  
29  
30 321 -salt or -sugar alternatives). They may also engage with diet-related health issues, which could include  
31  
32 322 developing and advertising new products that are out of scope of the regulations, particularly if there  
33  
34 323 is public support for the regulations and corresponding falls in demand for HFSS products. Doing so  
35  
36 324 reduces the proportion of HFSS products (relative to non-HFSS) available in the food system.

37 325 Reduced exposure to HFSS adverts may change social norms about the acceptability of consuming  
38  
39 326 HFSS products. It may also change a consumerism mindset that may be encouraged by adverts to over-  
40  
41 327 purchase and consume products. These changes could contribute to societal shifts that reinforce  
42  
43 328 lower demand for HFSS products and change macro-level eating behaviours.

44 329 Scenario 2: adaptations undermine impacts of the regulations on public health

45  
46 330 INSERT FIGURE 5 HERE

47  
48  
49 331 Food and drink companies could also minimise losses incurred by the regulations by redirecting their  
50  
51 332 efforts towards unregulated forms of marketing ('balloon effect'). Companies could increase their  
52  
53 333 expenditure on brand advertising, sports sponsorship, or advertising outdoors or in print or audio  
54  
55 334 media, none of which are intended to be covered by the regulations. In their marketing messaging,  
56  
57 335 companies could also reframe diet-related health issues to position inactive lifestyles as a more  
58  
59 336 substantial contribution to NCDs. It is unclear how this may affect people's total exposure to  
60  
337 marketing, and their resultant demand for HFSS products. Companies may also fear the

1  
2  
3 338 implementation of further regulations that could affect their performance, and so may lobby against  
4  
5 339 them. Lobbying could change future regulations such that their impact is limited, and in turn, may  
6  
7 340 mean that other, comparable regulations also have less chance of being implemented.

8  
9 341 To implement regulations, companies may increase the amount of data they collect about the  
10  
11 342 population. Such data gathering constitutes greater digital surveillance that impacts society (for  
12  
13 343 example, privacy rights),[46] but could also inform more targeted marketing that is known to be highly  
14  
15 344 effective at encouraging sales and consumption.[47–49]

16 345 Scenario 3: technicalities hinder potential impacts of the regulations on public health

17  
18  
19 346 INSERT FIGURE 6 HERE

20  
21 347 The regulations have a specific set of HFSS withing scope, which has notable exemptions such as some  
22  
23 348 salty foods. TV and online advertising for products exempt from the regulations may continue, as may  
24  
25 349 the corresponding purchasing and consumption of these products. Some participants reported that  
26  
27 350 the proposed scope of the regulations differ to that of other policies. Lack of consistency with other  
28  
29 351 regulations may make it costly – perhaps to the point of being futile – for companies to respond to  
30  
31 352 the regulations by developing new products that are compliant with all related regulations. Limited  
32  
33 353 development of new products would restrict the degree of transformation in the food system.  
34  
35 354 Furthermore, unlike other regulations, these advertising regulations are not defined by portion size  
36  
37 355 nor are smaller portion sizes an explicit objective of the regulations. This means there is no incentive  
38  
39 356 for companies to produce smaller product sizes, which could otherwise contribute towards reducing  
40  
41 357 calorie consumption via HFSS products.

42  
43 358 As advertising by small and medium enterprises are also exempt from the regulations, larger  
44  
45 359 companies may ‘atomise’ by creating smaller off-shoot companies, which can continue to advertise  
46  
47 360 and sell HFSS products without limitation by the regulations. Advertising of HFSS outside of the  
48  
49 361 watershed hours will still be permitted on TV and on-demand services, and large HFSS companies can  
50  
51 362 afford the high price of advertising slots likely to occur after 9pm. TV advertising after 9pm may  
52  
53 363 therefore become saturated with HFSS products, which may limit the impact of the regulations on  
54  
55 364 adults’ and older teenagers’ consumption habits and, by extension, that of the children they are  
56  
57 365 responsible for.

### 58 366 **Comparison to existing literature**

59 367 Many existing models exist to illustrate how food marketing affects behaviour and health (e.g.,[8])  
60  
368 and logic models are regularly produced to illustrate how other diet-related public health regulations  
369 may work. Methods for developing such models have evolved to appreciate the complexity of the

1  
2  
3 370 surrounding system in which they reside,[50] but to our knowledge, these have been rarely applied in  
4  
5 371 the context of diet-related health interventions,[51] and not applied to food advertising regulations  
6  
7 372 before. The concept map we developed here is the first we are aware of to show how food marketing  
8  
9 373 regulations may work by interacting with their surrounding system.

10  
11 374 The concept map we developed illustrates ways that reactions to the regulations will reinforce or  
12  
13 375 undermine their impact on public health, reinforcing the hypotheses of earlier work. [9] The potential  
14  
15 376 for some of these pathways to exist has been evidenced elsewhere. Analyses have found that 57 of  
16  
17 377 65 brands associated with HFSS had an easily identifiable HFSS product, and the majority (84%) of  
18  
19 378 these products had an alternative non-HFSS product from the same brand, master brand, parent  
20  
21 379 company, or license holder company brand portfolio in the UK.[52] Evidence also indicates that HFSS  
22  
23 380 companies have reformulated and developed new products in responses to diet-related policies in the  
24  
25 381 UK, such as the Soft Drinks Industry Levy.[53,54] This evidence corresponds with pathways in the map  
26  
27 382 that show how companies could redistribute advertising from regulated to unregulated products.

28  
29 383 Pathways that illustrate the risk of food companies undermining the regulations may be particularly  
30  
31 384 plausible given existing evidence has documented industry opposition to HFSS advertising regulations  
32  
33 385 in the UK.[42,43] The UK government's Department for Digital, Culture, Media & Sport impact  
34  
35 386 assessment of the regulations also assumed that a degree of HFSS advertising will be displaced to  
36  
37 387 other media,[31] as has existing research on the TV regulation specifically.[9,55] It is also widely  
38  
39 388 documented in broader literature that efforts to undermine such regulations often form part of wider  
40  
41 389 market strategies that, when exerted by powerful and global corporations, are difficult to address with  
42  
43 390 singular regulations.[56] Our concept map builds on this evidence by elucidating pathways through  
44  
45 391 which regulation may be undermined, from which it may be possible to adapt the proposed  
46  
47 392 regulations or implement additional, complementary ones to maximise the likelihood of the  
48  
49 393 regulations achieving their public health goals.

#### 46 394 **Implications and further research**

47  
48 395 As the TV and online advertising regulations are not yet implemented, our findings could be used to  
49  
50 396 augment the proposed legislation to encourage stakeholder reactions that maximise the regulations  
51  
52 397 potential benefits. Ensuring that definitions underpinning the legislation, particularly those relating to  
53  
54 398 product categories, harmonise with other legislation affecting commercial food providers may double-  
55  
56 399 down the incentive to reformulate or develop new, non-HFSS products rather than market HFSS  
57  
58 400 products by other means. Expanding the existing definition to a wider range of foods (e.g., salty snacks  
59  
60 401 currently exempt) could have the same effect. Implementing comparable regulations on other forms  
402  
of marketing, such as a ban on outdoor advertising of HFSS as has been seen in London,[57] would

1  
2  
3 403 also limit opportunity to redistribute advertising spend for HFSS. Expediting the implementation of  
4 404 other regulations affecting the commercial food system, such as the proposed volume and location  
5 405 price promotion regulations,[58] has similar potential to maximise the benefit of the TV and online  
6 406 advertising ones by limiting opportunities for redistributing efforts to unregulated marketing. Some  
7 407 of these proposed alterations echo responses to the Department of Health and Social Care, and  
8 408 Department For Digital, Culture, Media and Sport 2020 policy consultation.[13] That they were  
9 409 repeated and validated by experts in multiple related fields included in our study reinforce their  
10 410 potential benefit.

11 411 The concept map could be used to design a complexity-informed evaluation of the regulations.  
12 412 Complex explanations of intervention impacts appreciate that instead of a singular cause-effect  
13 413 pathway, interventions can act as stimuli that send reverberations across the system in which they  
14 414 reside.[59,60] Complex adaptive system methods also appreciate the role of relationships between  
15 415 actors contributing to a variety of processes operating at different levels and scale to produce  
16 416 intervention outcomes.[50] In doing so, they help avoid finding a wrong answer to important  
17 417 questions,[61,62] and may help measure the impact of unintended consequences alongside the  
18 418 outcomes that the policy sets out to achieve.[63] By explicitly exploring the connections in a complex  
19 419 system, these methods may also identify novel leverage points which could be targeted by future  
20 420 interventions. Though the map developed in our study was not explicitly conceived in systems  
21 421 thinking, it has many systemic qualities (e.g., emphasises the role of relationships) and correlates with  
22 422 other methods such as 'system mapping' that have been identified as a key component of systems-  
23 423 informed evaluations.[50] The concept map could be used to define focal areas for evaluative studies  
24 424 of both the intended and unintended consequences of the regulations or could form the basis of other  
25 425 systems evaluation methods. This could also help establish the relative 'strength' of each relationship.

26 426 A benefit of theory, here in the form of a concept map, is that it enables the application of findings  
27 427 elsewhere.[28,29] The presence of food marketing regulations in other countries[64] – albeit different  
28 428 to the ones proposed in the UK - suggests there may be political appetite to learn from the UK's  
29 429 experience. For example, policymakers could refer to the map to consider mechanisms and pathways  
30 430 that are particularly relevant to their country context, and thus important to consider in developing  
31 431 their legislation. Findings that emerge from an evaluation based on the map would also be particularly  
32 432 applicable in other countries and contexts, as the maps clarifies how they are embedded with other  
33 433 stakeholders' adaptations following the implementation of the regulations.

## 434 **CONCLUSIONS**

435 While the proposed UK TV and online food advertising regulations will be some of the most restrictive  
436 in the world, the concept map developed in this paper illustrates that the extent to which they improve  
437 diet-related health will ultimately be determined by stakeholder reactions in the surrounding system.  
438 The map may be used as a basis for establishing a comprehensive evaluation of the UK regulations,  
439 and to inform similar regulations elsewhere. To realise the full potential of the regulations, UK  
440 policymakers may also use the map to identify and prevent loopholes in the legislations before they  
441 are implemented.

442

## 443 **Contributors**

444 EB, PS, RS, MW AND JA CONCEIVED THE STUDY AND ACQUIRED FUNDING. HF AND JA  
445 DEVELOPED THE METHODOLOGY AND ACCOMPANYING RESOURCES AND CONDUCTED THE  
446 WORKSHOPS. HF COLLATED AND VALIDATED THE DATA. HF PREPARED THE MANUSCRIPT,  
447 AND THE DRAFT VERSIONS WERE CRITICALLY REVIEWED BY EB, PS, RS, MA AND JA. ALL  
448 AUTHORS APPROVED THE FINAL MANUSCRIPT.

## 449 **Funding**

450 This project was funded by the National Institute for Health Research Public Health Research  
451 Programme (project number 133570). The views and opinions expressed therein are those of the  
452 authors and do not necessarily reflect those of the Public Health Research Programme, NIHR, NHS or  
453 the Department of Health. HF, MW, JA are supported by the MRC Epidemiology Unit, University of  
454 Cambridge [grant number MC/UU/00006/7].

## 455 **Competing interests**

456 JA and MW report research grants from the Medical Research Council, the Biotechnology and  
457 Biological Sciences Research Council, the Canadian Institutes of Health Research, the Department of  
458 Health & Social Care Policy Research Units, and National Institute for Health Research during the  
459 conduct of the study. MW is a member of the Expert Advisory Group of the Food Foundation, a  
460 Community Interest Company in the UK that is leading work on food insecurity, including  
461 coordinating an ongoing independent inquiry into childhood food insecurity, led by the All-Party  
462 Parliamentary Group on Hunger and Food Poverty. HF previously worked for a market research  
463 company, which conducts research on behalf of many companies, including those from the food and  
464 drink industry. HF, JA and MW have submitted evidence to the Department of Health and Social

1  
2  
3 465 Care, and Department For Digital, Culture, Media and Sport 2020 consultation for the regulations  
4  
5 466 under study, available here: [https://www.cedar.iph.cam.ac.uk/resources/evidence-](https://www.cedar.iph.cam.ac.uk/resources/evidence-submissions/#HFSSadban)  
6  
7 467 [submissions/#HFSSadban](https://www.cedar.iph.cam.ac.uk/resources/evidence-submissions/#HFSSadban). RS reports grants from the Medical Research Council, National Institute  
8  
9 468 for Health Research, Wellcome Trust and Food Standards Agency during the conduct of the study. EB  
10  
11 469 reports grants from Public Health England during the conduct of the study. PS reports grants from  
12  
13 470 British Heart Foundation, National Institute for Health Research, Medical Research Council and  
14  
15 471 Wellcome Trust during the conduct of the study. The authors declare no other conflicts of interest.

#### 16 472 **Data availability statement**

17  
18 473 Each workshop map is available in **Appendix 2** but recordings are not available as it is not possible to  
19  
20 474 sufficiently anonymise participants.

#### 21 22 475 **Exclusive License**

23  
24 476 I, the Submitting Author has the right to grant and does grant on behalf of all authors of the Work  
25  
26 477 (as defined in the below author licence), an exclusive licence and/or a non-exclusive licence for  
27  
28 478 contributions from authors who are: i) UK Crown employees; ii) where BMJ has agreed a CC-BY  
29  
30 479 licence shall apply, and/or iii) in accordance with the terms applicable for US Federal Government  
31  
32 480 officers or employees acting as part of their official duties; on a worldwide, perpetual, irrevocable,  
33  
34 481 royalty-free basis to BMJ Publishing Group Ltd (“BMJ”) its licensees and where the relevant Journal is  
35  
36 482 co-owned by BMJ to the co-owners of the Journal, to publish the Work in BMJ Open and any other  
37  
38 483 BMJ products and to exploit all rights, as set out in our licence.

39  
40 484 The Submitting Author accepts and understands that any supply made under these terms is made by  
41  
42 485 BMJ to the Submitting Author unless you are acting as an employee on behalf of your employer or a  
43  
44 486 postgraduate student of an affiliated institution which is paying any applicable article publishing  
45  
46 487 charge (“APC”) for Open Access articles. Where the Submitting Author wishes to make the Work  
47  
48 488 available on an Open Access basis (and intends to pay the relevant APC), the terms of reuse of such  
49  
50 489 Open Access shall be governed by a Creative Commons licence – details of these licences and which  
51  
52 490 Creative Commons licence will apply to this Work are set out in our licence referred to above.

## References

- 1  
2  
3  
4  
5 491 1 World Health Organization. Set of recommendations on the marketing of foods and non-  
6 492 alcoholic beverages to children. World Health Organization.  
7 493 2010;:14.<https://www.who.int/dietphysicalactivity/publications/recsmarketing/en/>  
8 494 (accessed 3 Nov 2017).
- 9  
10  
11  
12 495 2 Boyland EJ, Nolan S, Kelly B, *et al.* Advertising as a cue to consume: A systematic review and  
13 496 meta-analysis of the effects of acute exposure to unhealthy food and nonalcoholic beverage  
14 497 advertising on intake in children and adults. *American Journal of Clinical Nutrition*  
15 498 2016;**103**:519–33. doi:10.3945/ajcn.115.120022
- 16  
17  
18  
19 499 3 Smith R, Kelly B, Yeatman H, *et al.* Food Marketing Influences Children’s Attitudes,  
20 500 Preferences and Consumption: A Systematic Critical Review. *Nutrients* 2019;**11**:875.  
21 501 doi:10.3390/nu11040875
- 22  
23  
24  
25 502 4 Cairns G. A critical review of evidence on the sociocultural impacts of food marketing and  
26 503 policy implications. *Appetite* 2019;**136**:193–207. doi:10.1016/j.appet.2019.02.002
- 27  
28  
29  
30 504 5 American Marketing Association. Definitions of Marketing. American Marketing Association.  
31 505 <https://www.ama.org/AboutAMA/Pages/Definition-of-Marketing.aspx> (accessed 22 Oct  
32 506 2017).
- 33  
34  
35 507 6 McCarthy JE. *Basic Marketing. A Managerial Approach*. Homewood, IL: : Irwin 1964.
- 36  
37  
38 508 7 The Food Foundation. The Broken Plate 2020: The state of the nations Food System.  
39 509 2020.[https://foodfoundation.org.uk/wp-content/uploads/2020/09/FF-Broken-Plate-2020-](https://foodfoundation.org.uk/wp-content/uploads/2020/09/FF-Broken-Plate-2020-DIGITAL-FULL.pdf)  
40 510 DIGITAL-FULL.pdf (accessed 6 Mar 2021).
- 41  
42  
43 511 8 Kelly B, King L, Chapman K, *et al.* A hierarchy of unhealthy food promotion effects: Identifying  
44 512 methodological approaches and knowledge gaps. *American Journal of Public Health*.  
45 513 2015;**105**:e86–95. doi:10.2105/AJPH.2014.302476
- 46  
47  
48  
49 514 9 Mytton O, Boyland E, Adams J, *et al.* The potential health impact of restricting less-healthy  
50 515 food and beverage advertising on UK television between 05.30 and 21.00 hours: a modelling  
51 516 study. *PLoS Medicine* 2020;**17**:e1003212. doi:10.1371/journal.pmed.1003212
- 52  
53  
54  
55 517 10 Department of Health & Social Care. Tackling obesity: empowering adults and children to live  
56 518 healthier lives. 2020.[https://www.gov.uk/government/publications/tackling-](https://www.gov.uk/government/publications/tackling-obesity%02government-strategy/tackling-obesity-empowering-adults-and-children-to-live-)  
57 519 obesity%02government-strategy/tackling-obesity-empowering-adults-and-children-to-live-
- 58  
59  
60

- 1  
2  
3 520 healthier%02lives#empowering-everyone-with-the-right-information-to-make-healthier-  
4 choices (accessed 14 Sep 2020).  
5 521  
6  
7 522 11 UK Government. Health and Care Bill. London, UK: : UK Parliament 2021.  
8  
9 523 <https://bills.parliament.uk/bills/3022>  
10  
11 524 12 Department of Health and Social Care: Global Public Health Directorate. Childhood obesity: a  
12 plan for action, chapter 2. HM Government.  
13 525  
14 526 2018.<https://assets.publishing.service.gov.uk/government/uploads/system/uploads/attachm>  
15 ent\_data/file/718903/childhood-obesity-a-plan-for-action-chapter-2.pdf (accessed 24 Mar  
16 527 2021).  
17 528  
18  
19  
20 529 13 HM Government. Introducing further advertising restrictions on TV and online for products  
21 high in fat, sugar and salt (HFSS).  
22 530  
23 531 2019.<https://assets.publishing.service.gov.uk/government/uploads/system/uploads/attachm>  
24 ent\_data/file/795412/hfss-advertising-consultation-10-april-2019.pdf (accessed 20 Jan 2021).  
25 532  
26  
27 533 14 Taillie LS, Busey E, Stoltze FM, *et al.* Governmental policies to reduce unhealthy food  
28 marketing to children. *Nutrition Reviews* 2019;**0**:1–32. doi:10.1093/nutrit/nuz059  
29 534  
30  
31 535 15 Ofcom. Media Nations 2020: UK report 2020. 2020.  
32 [https://www.ofcom.org.uk/\\_\\_data/assets/pdf\\_file/0010/200503/media-nations-2020-uk-](https://www.ofcom.org.uk/__data/assets/pdf_file/0010/200503/media-nations-2020-uk-report.pdf)  
33 report.pdf  
34 536  
35 537  
36  
37 538 16 Ofcom. Media nations: UK 2021. 2021.  
38  
39  
40 539 17 Murphy G, Corcoran C, Tatlow-Golden M, *et al.* See, Like, Share, Remember: Adolescents’  
41 Responses to Unhealthy-, Healthy- and Non-Food Advertising in Social Media. *International*  
42 *Journal of Environmental Research and Public Health* 2020;**17**. doi:10.3390/ijerph17072181  
43 541  
44  
45 542 18 Coates AE, Hardman CA, Halford JCG, *et al.* Social Media Influencer Marketing and Children’s  
46 Food Intake: A Randomized Trial. *Pediatrics* 2019;**143**:e20182554. doi:10.1542/peds.2018-  
47 2554  
48 543  
49 544  
50  
51 545 19 Ertz M, le Bouhart G. The Other Pandemic: A Conceptual Framework and Future Research  
52 Directions of Junk Food Marketing to Children and Childhood Obesity. *Journal of*  
53 *Macromarketing* 2022;**42**:30–50. doi:10.1177/02761467211054354  
54 547  
55  
56  
57 548 20 Ogilvie D, Adams J, Bauman A, *et al.* Using natural experimental studies to guide public health  
58 action: turning the evidence-based medicine paradigm on its head. *Journal of Epidemiology*  
59 *and Community Health* 2020;**74**:203–8. doi:10.1136/jech-2019-213085  
60 550



- 1  
2  
3 551 21 White M, Aguirre E, Finegood DT, *et al.* What role should the commercial food system play in  
4 promoting health through better diet? *BMJ* 2020;**368**:m545. doi:10.1136/bmj.m545  
5  
6  
7 553 22 Mora F. Victims of the Balloon Effect: Drug Trafficking and U.S. Policy in Brazil and the  
8 Southern Cone of Latin America. *The Journal of Social, Political, and Economic Studies*  
9 1996;**21**:115.  
10  
11  
12  
13 556 23 Boyland EJ, Harris JL. Regulation of food marketing to children: Are statutory or industry self-  
14 governed systems effective? *Public Health Nutrition* 2017;**20**:761–4.  
15 557  
16 558 doi:10.1017/S1368980017000465  
17  
18  
19 559 24 Coleman PC, Hanson P, Rens T van, *et al.* A rapid review of the evidence for  
20 children's TV and online advertisement restrictions to fight obesity. *Preventive*  
21 *Medicine Reports* 2022;:101717. doi:10.1016/j.pmedr.2022.101717  
22  
23  
24 562 25 Jiménez-Marín G, Zambrano RE, Galiano-Coronil A, *et al.* Food and Beverage Advertising  
25 Aimed at Spanish Children Issued through Mobile Devices: A Study from a Social Marketing  
26 and Happiness Management Perspective. *International Journal of Environmental Research*  
27 *and Public Health* 2020;**17**:1–18. doi:10.3390/ijerph17145056  
28  
29  
30  
31 566 26 Sing F, Mackay S, Culpin A, *et al.* Food Advertising to Children in New Zealand: A Critical  
32 Review of the Performance of a Self-Regulatory Complaints System Using a Public Health Law  
33 Framework. *Nutrients* 2020;**12**. doi:10.3390/nu12051278  
34  
35  
36  
37 569 27 Lee Y, Yoon J, Chung SJ, *et al.* Effect of TV food advertising restriction on food environment  
38 for children in South Korea. *Health Promotion International* 2017;**32**:25–34.  
39 570  
40 571 doi:10.1093/heapro/dat078  
41  
42  
43 572 28 Ogilvie D, Cummins S, Petticrew M, *et al.* Assessing the Evaluability of Complex Public Health  
44 Interventions: Five Questions for Researchers, Funders, and Policymakers. *Milbank Quarterly*  
45 2011;**89**:206–25. doi:10.1111/j.1468-0009.2011.00626.x  
46  
47  
48  
49 575 29 Rosas SR. Concept mapping as a technique for program theory development: An illustration  
50 using family support programs. *American Journal of Evaluation* 2005;**26**:389–401.  
51 576  
52 577 doi:10.1177/1098214005278760  
53  
54  
55 578 30 Burke JG, O'Campo P, Peak GL, *et al.* An introduction to concept mapping as a participatory  
56 public health research method. *Qualitative Health Research* 2005;**15**:1392–410.  
57 579  
58 580 doi:10.1177/1049732305278876  
59  
60

- 1  
2  
3 581 31 Anderson LA, Slonim A. Perspectives on the strategic uses of concept mapping to address  
4 582 public health challenges. *Evaluation and Program Planning* 2017;**60**:194–201.  
5 583 doi:10.1016/j.evalprogplan.2016.08.011  
6  
7  
8  
9 584 32 Trochim WMK. An introduction to concept mapping for planning and evaluation. *Evaluation  
10 585 and Program Planning* 1989;**12**. doi:10.1016/0149-7189(89)90016-5  
11  
12  
13 586 33 Tong A, Sainsbury P, Craig J. Consolidated criteria for reporting qualitative research (COREQ):  
14 587 a 32-item checklist for interviews and focus groups. *International Journal for Quality in Health  
15 588 Care* 2007;**19**:349–57. doi:10.1093/intqhc/mzm042  
16  
17  
18 589 34 Albury C, Pope C, Shaw S, *et al*. Gender in the consolidated criteria for reporting qualitative  
19 590 research (COREQ) checklist. *International Journal for Quality in Health Care* 2021;**33**:2021.  
20 591 doi:10.1093/intqhc/mzab123  
21  
22  
23  
24 592 35 Braun V, Clarke V. To saturate or not to saturate? Questioning data saturation as a useful  
25 593 concept for thematic analysis and sample-size rationales. *Qualitative Research in Sport,  
26 594 Exercise and Health* 2019;**1**:1–16. doi:10.1080/2159676X.2019.1704846  
27  
28  
29  
30 595 36 van der Graaf P, Forrest LF, Adams J, *et al*. How do public health professionals view and  
31 596 engage with research? A qualitative interview study and stakeholder workshop engaging  
32 597 public health professionals and researchers. *BMC Public Health* 2017;**17**:1–10.  
33 598 doi:10.1186/s12889-017-4896-1  
34  
35  
36  
37 599 37 Forde H, Solomon-Moore E. A Qualitative Study to Understand the Potential Efficacy of an  
38 600 Information-Based Sugar Reduction Intervention among Low Socioeconomic Individuals in  
39 601 the UK. *International Journal of Environmental Research and Public Health* 2019;**16**:413.  
40 602 doi:10.3390/ijerph16030413  
41  
42  
43  
44  
45 603 38 Penney T, Adams J, Briggs A, *et al*. Evaluation of the impacts on health of the proposed UK  
46 604 industry levy on sugar sweetened beverages: developing a systems map and data platform,  
47 605 and collection of baseline and early impact data. 2017.  
48  
49  
50  
51 606 39 Chatham House. Chatham House Rule. 2021.[https://www.chathamhouse.org/about-](https://www.chathamhouse.org/about-us/chatham-house-rule)  
52 607 [us/chatham-house-rule](https://www.chathamhouse.org/about-us/chatham-house-rule) (accessed 18 Aug 2021).  
53  
54  
55 608 40 Savona N, Macauley T, Aguiar A, *et al*. Identifying the views of adolescents in five European  
56 609 countries on the drivers of obesity using group model building. *European Journal Of Public  
57 610 Health* 2021;**ckaa251**. doi:10.1093/eurpub/ckaa251  
58  
59  
60

- 1  
2  
3 611 41 Department for Digital Culture Media and Sport. Impact assessment: introducing a 2100 to  
4 612 0530 watershed on TV and online restriction for paid advertising of food and drink that are  
5 613 high in fat, salt or sugar (HFSS) products. London, UK: 2021.
- 6  
7  
8  
9 614 42 Carters-White L, Chambers S, Skivington K, *et al.* Whose rights deserve protection? Framing  
10 615 analysis of responses to the 2016 committee of advertising practice consultation on the non-  
11 616 broadcast advertising of foods and soft drinks to children. *Food Policy* 2021;**104**:102139.  
12 617 doi:10.1016/j.foodpol.2021.102139
- 13  
14  
15  
16 618 43 Lauber K, Hunt D, Gilmore A, *et al.* Corporate political activity in the context of unhealthy  
17 619 food advertising restrictions across Transport for London: A qualitative case study. *PLoS*  
18 620 *Medicine* 2021;**18**:e1003695. doi:10.1371/journal.pmed.1003695
- 19  
20  
21  
22 621 44 Boland J, Banks S, Krabbe R, *et al.* A COVID-19-era rapid review: using Zoom and Skype for  
23 622 qualitative group research. *Public Health Research & Practice* 2021;:1–9.  
24 623 doi:10.17061/phrp31232112
- 25  
26  
27  
28 624 45 Birt L, Scott S, Cavers D, *et al.* Member Checking: A Tool to Enhance Trustworthiness or  
29 625 Merely a Nod to Validation? *Qualitative Health Research* 2016;**26**:1802–11.  
30 626 doi:10.1177/1049732316654870
- 31  
32  
33  
34 627 46 Tatlow-Golden M, Garde A. Digital food marketing to children: Exploitation, surveillance and  
35 628 rights violations. *Global Food Security* 2020;**27**:100423. doi:10.1016/j.gfs.2020.100423
- 36  
37  
38  
39 629 47 Montgomery KC, Chester J. Interactive Food and Beverage Marketing: Targeting Adolescents  
40 630 in the Digital Age. *Journal of Adolescent Health*. 2009;**45**.  
41 631 doi:10.1016/j.jadohealth.2009.04.006
- 42  
43  
44  
45 632 48 de Jans S, van de Sompel D, Hudders L, *et al.* Advertising targeting young children: an  
46 633 overview of 10 years of research (2006–2016). *International Journal of Advertising*  
47 634 2019;**38**:173–206. doi:10.1080/02650487.2017.1411056
- 48  
49  
50  
51 635 49 Harris JL, Frazier III W, Kumanyika SK, *et al.* Increasing disparities in unhealthy food  
52 636 advertising targeted to Hispanic and Black youth. 2019.
- 53  
54  
55  
56 637 50 McGill E, Er V, Penney T, *et al.* Evaluation of public health interventions from a complex  
57 638 systems perspective: a research methods review. *Social Science & Medicine*  
58 639 2021;**272**:113697. doi:10.1016/j.socscimed.2021.113697
- 59  
60

- 1  
2  
3 640 51 Penney TL, Adams J, Briggs A, *et al.* Theorising how the UK soft drinks industry levy could  
4 641 impact population level diet and health: development of a multi-sectoral systems map. In:  
5 642 *International Society for Behavioural Nutrition and Physical Activity.* 2017. 203.
- 6  
7  
8  
9 643 52 Cheek O, Froguel A, Clark M. Analysis on the potential for UK's leading food and soft drink  
10 644 brands to switch to marketing their non-HFSS products. London: 2021.
- 11  
12  
13 645 53 Pell D, Mytton O, Penney TL, *et al.* Changes in soft drinks purchased by British households  
14 646 associated with the UK soft drinks industry levy: controlled interrupted time series analysis.  
15 647 *The BMJ* 2021;**372**:n254. doi:10.1136/bmj.n254
- 16  
17  
18 648 54 Pell D, Penney T, Mytton O, *et al.* Anticipatory changes in British household purchases of soft  
19 649 drinks associated with the announcement of the Soft Drinks Industry Levy: a controlled  
20 650 interrupted time series analysis. *PLoS Medicine* 2020;**17**:e1003269.  
21 651 doi:10.1371/journal.pmed.1003269
- 22  
23  
24 652 55 Griffith R, Connell MO, Smith K, *et al.* The potential impacts of banning television advertising  
25 653 of HFSS food and drink before the watershed: Report produced for the Obesity Policy  
26 654 Research Unit. Institute for Fiscal Studies. 2019.[https://www.ucl.ac.uk/obesity-policy-](https://www.ucl.ac.uk/obesity-policy-research-unit/sites/obesity-policy-research-unit/files/potentialimpactofban_new.pdf)  
27 655 [research-unit/sites/obesity-policy-research-unit/files/potentialimpactofban\\_new.pdf](https://www.ucl.ac.uk/obesity-policy-research-unit/sites/obesity-policy-research-unit/files/potentialimpactofban_new.pdf)  
28 656 (accessed 11 Jan 2021).
- 29  
30  
31 657 56 Wood B, Williams O, Nagarajan V, *et al.* Market strategies used by processed food  
32 658 manufacturers to increase and consolidate their power: a systematic review and document  
33 659 analysis. *Globalization and health* 2021;**17**:17. doi:10.1186/s12992-021-00667-7
- 34  
35  
36 660 57 Mayor of London. Press release: Mayor confirms ban on junk food advertising on transport  
37 661 network. Mayor of London. 2018.[https://www.london.gov.uk/press-releases/mayoral/ban-](https://www.london.gov.uk/press-releases/mayoral/ban-on-junk-food-advertising-on-transport-network-0)  
38 662 [on-junk-food-advertising-on-transport-network-0](https://www.london.gov.uk/press-releases/mayoral/ban-on-junk-food-advertising-on-transport-network-0) (accessed 24 Mar 2021).
- 39  
40  
41 663 58 Department of Health and Social Care. Restricting promotions of products high in fat, sugar  
42 664 and salt by location and by price: government response to public consultation.  
43 665 2020.[https://www.gov.uk/government/consultations/restricting-promotions-of-food-and-](https://www.gov.uk/government/consultations/restricting-promotions-of-food-and-drink-that-is-high-in-fat-sugar-and-salt/outcome/restricting-promotions-of-products-high-in-fat-sugar-and-salt-by-location-and-by-price-government-response-to-public-consultati)  
44 666 [drink-that-is-high-in-fat-sugar-and-salt/outcome/restricting-promotions-of-products-high-in-](https://www.gov.uk/government/consultations/restricting-promotions-of-food-and-drink-that-is-high-in-fat-sugar-and-salt/outcome/restricting-promotions-of-products-high-in-fat-sugar-and-salt-by-location-and-by-price-government-response-to-public-consultati)  
45 667 [fat-sugar-and-salt-by-location-and-by-price-government-response-to-public-consultati](https://www.gov.uk/government/consultations/restricting-promotions-of-food-and-drink-that-is-high-in-fat-sugar-and-salt/outcome/restricting-promotions-of-products-high-in-fat-sugar-and-salt-by-location-and-by-price-government-response-to-public-consultati)  
46 668 (accessed 14 Mar 2021).
- 47  
48  
49 669 59 Shiell A, Hawe P, Gold L. Complex interventions or complex systems? Implications for health  
50 670 economic evaluation. *BMJ* 2008;**336**:1281–3. doi:10.1136/bmj.39569.510521.AD
- 51  
52  
53  
54  
55  
56  
57  
58  
59  
60

- 1  
2  
3 671 60 Petticrew M. When are complex interventions “complex”? When are simple interventions  
4 “simple”? *European Journal of Public Health* 2011;**21**:397–8. doi:10.1093/eurpub/ckr084  
5 672  
6  
7 673 61 Rutter H, Savona N, Glonti K, *et al.* The need for a complex systems model of evidence for  
8 public health. *The Lancet* 2017;**390**:2602–4. doi:10.1016/S0140-6736(17)31267-9  
9 674  
10  
11 675 62 Fink DS, Keyes KM. Wrong answers: when simple interpretations create complex problems.  
12 In: El-Sayed AM, Galea S, eds. *Systems science and population health*. New York: : Oxford  
13 676 University Press 2017. 25–36.  
14 677  
15  
16  
17 678 63 Roux AVD. Complex systems thinking and current impasses in health disparities research.  
18 *American Journal of Public Health* 2011;**101**:1627–34. doi:10.2105/AJPH.2011.300149  
19 679  
20  
21 680 64 World Cancer Research Fund International. NOURISHING Database.  
22 <https://www.wcrf.org/int/policy/nourishing-database> (accessed 11 Jun 2019).  
23 681  
24  
25 682  
26  
27

## 683 **FIGURE TITLES**

684 **Figure 1. Summary of method used to develop the concept map**

685 **Figure 2. Examples of mapping concepts and pathways using Miro**

686 **Figure 3. Concept map of pathways through which the proposed UK TV and online advertising  
687 regulations may affect the commercial food system, health and society**

688 **Figure 4. Illustration of concept map use: scenario 1**

689 **Figure 5. Illustration of concept map use: scenario 2**

690 **Figure 6. Illustration of concept map use: scenario 3**

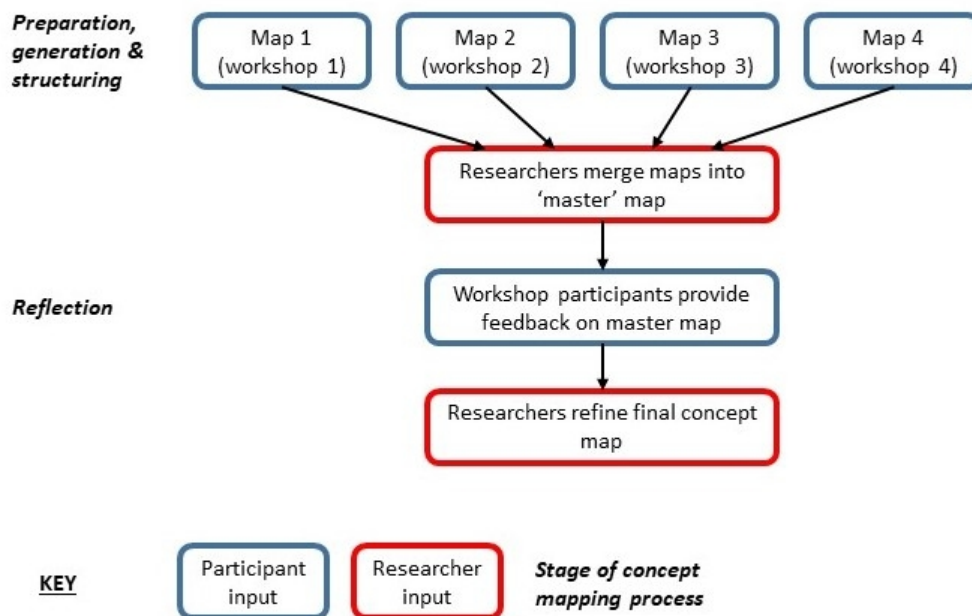

Figure 1 Summary of method used to develop the concept map

176x115mm (96 x 96 DPI)

1  
2  
3  
4  
5  
6  
7  
8  
9  
10  
11  
12  
13  
14  
15  
16  
17  
18  
19  
20  
21  
22  
23  
24  
25  
26  
27  
28  
29  
30  
31  
32  
33  
34  
35  
36  
37  
38  
39  
40  
41  
42  
43  
44  
45  
46  
47  
48  
49  
50  
51  
52  
53  
54  
55  
56  
57  
58  
59  
60



Figure 2 Examples of mapping concepts and pathways using Miro  
 176x158mm (96 x 96 DPI)

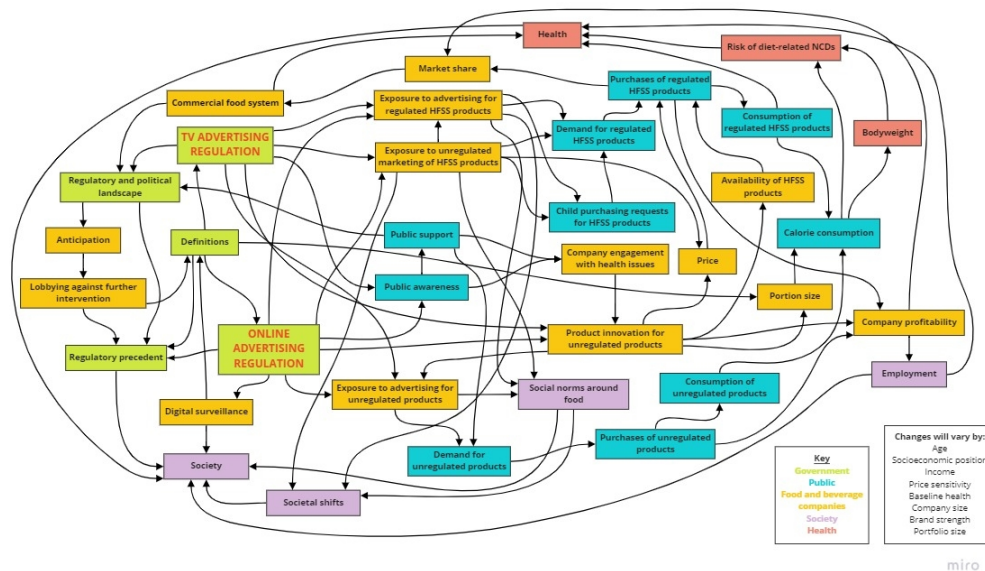

Figure 3 Concept map of pathways through which the proposed UK TV and online advertising regulations may affect the commercial food system, health

391x231mm (72 x 72 DPI)



1  
2  
3  
4  
5  
6  
7  
8  
9  
10  
11  
12  
13  
14  
15  
16  
17  
18  
19  
20  
21  
22  
23  
24  
25  
26  
27  
28  
29  
30  
31  
32  
33  
34  
35  
36  
37  
38  
39  
40  
41  
42  
43  
44  
45  
46  
47  
48  
49  
50  
51  
52  
53  
54  
55  
56  
57  
58  
59  
60

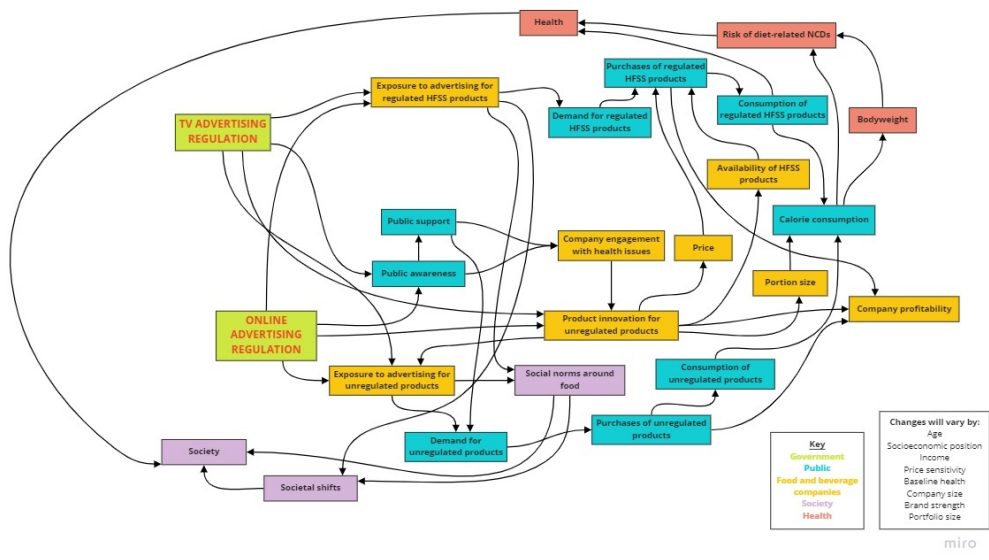

Scenario 1: adaptations reinforce positive impacts of the regulations on public health

398x226mm (72 x 72 DPI)

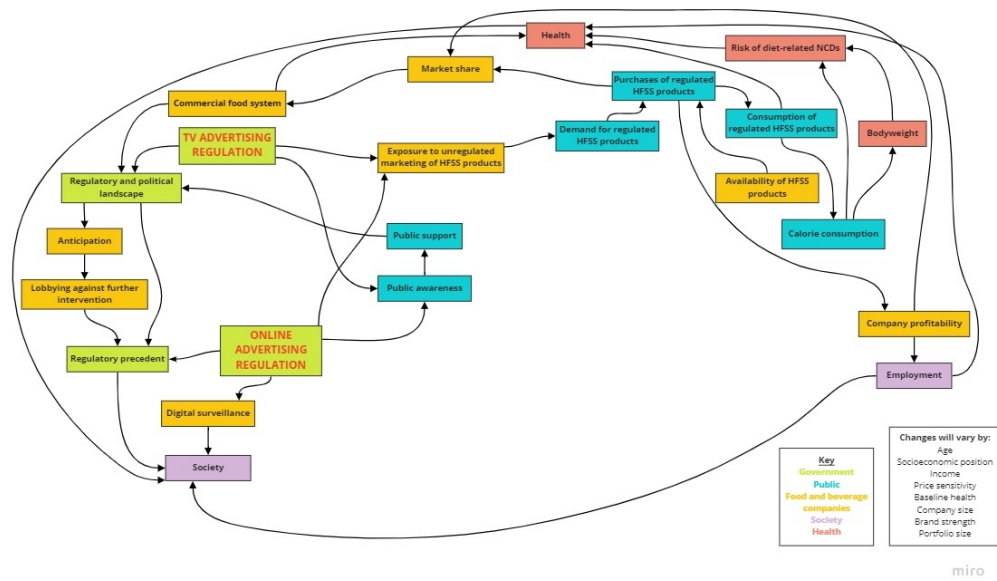

Scenario 2: adaptations undermine impacts of the regulations on public health

389x232mm (72 x 72 DPI)

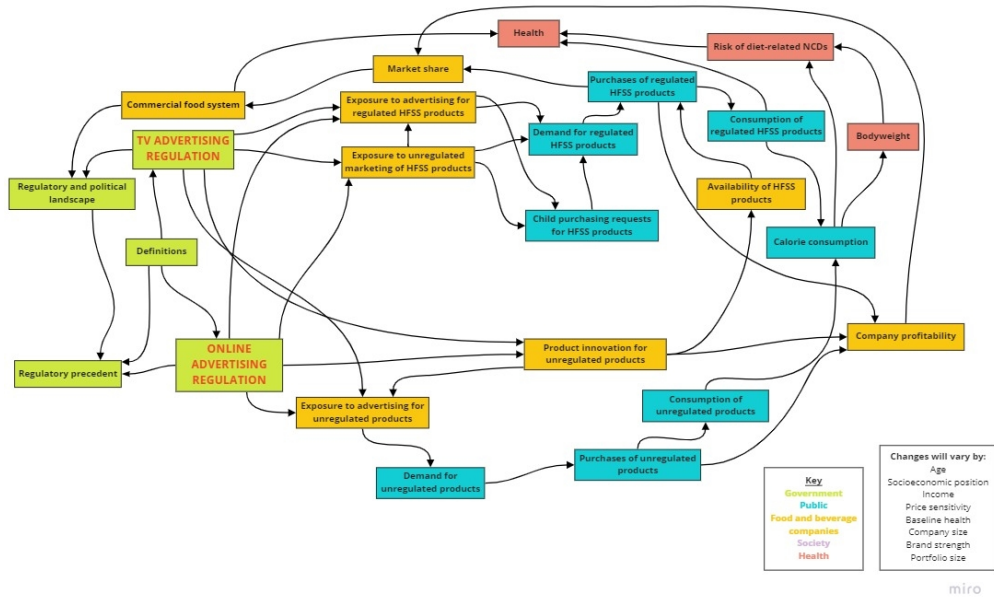

Scenario 3: technicalities hinder potential impacts of the regulations on public health

383x236mm (72 x 72 DPI)

Appendix 1: Consolidated criteria for reporting qualitative studies (COREQ): 32-item checklist

| No.                                            | Item                                     | Guide questions/description                                                                                                                               | Section    |
|------------------------------------------------|------------------------------------------|-----------------------------------------------------------------------------------------------------------------------------------------------------------|------------|
| <b>Domain 1: Research team and reflexivity</b> |                                          |                                                                                                                                                           |            |
| Personal characteristics                       |                                          |                                                                                                                                                           |            |
| 1.                                             | Interviewer/facilitator                  | Which author/s conducted the interviews or focus groups?                                                                                                  | 6          |
| 2.                                             | Credentials                              | What were the researcher's credentials? e.g., PhD, MD                                                                                                     | Title page |
| 3.                                             | Occupation                               | What was their occupation at the time of the study?                                                                                                       | Title page |
| 4.                                             | Gender                                   | Was the researcher male or female?                                                                                                                        | See note   |
| 5.                                             | Experience and training                  | What experience or training did the researcher have?                                                                                                      | 6          |
| Relationship with participants                 |                                          |                                                                                                                                                           |            |
| 6.                                             | Relationship established                 | Was a relationship established prior to study commencement?                                                                                               | 6          |
| 7.                                             | Participant knowledge of the interviewer | What did the participants know about the research? e.g., personal goals, reasons for doing the research                                                   | 6          |
| 8.                                             | Interviewer characteristics              | What characteristics were reported about the interviewer/facilitator? e.g., bias, assumptions, reasons and interests in the research topic                | N/A        |
| <b>Domain 2: study design</b>                  |                                          |                                                                                                                                                           |            |
| Theoretical framework                          |                                          |                                                                                                                                                           |            |
| 9.                                             | Methodological orientation and Theory    | What methodological orientation was stated to underpin the study? e.g., grounded theory, discourse analysis, ethnography, phenomenology, content analysis | 6          |
| Participant selection                          |                                          |                                                                                                                                                           |            |
| 10.                                            | Sampling                                 | How were the participants selected? e.g., purposive, convenience, consecutive, snowball                                                                   | 6          |
| 11.                                            | Method of approach                       | How were participants approached? e.g., face-to-face, telephone, mail, email                                                                              | 6          |
| 12.                                            | Sample size                              | How many participants were in the study?                                                                                                                  | 8          |
| 13.                                            | Non-participation                        | How many people refused to participate or dropped out? Reasons?                                                                                           | N/A        |
| Setting                                        |                                          |                                                                                                                                                           |            |
| 14.                                            | Setting of data collection               | Where was the data collected? e.g., home, clinic, workplace                                                                                               | 6-7        |
| 15.                                            | Presence of non-participants             | Was anyone else present besides the participants and researchers?                                                                                         | N/A        |
| 16.                                            | Description of sample                    | What are the important characteristics in the sample? e.g., demographic data, date                                                                        | 8          |
| Data collection                                |                                          |                                                                                                                                                           |            |
| 17.                                            | Interview guide                          | Were questions, prompts, guides provided by the authors? Was it pilot tested?                                                                             | 6          |
| 18.                                            | Repeat interviews                        | Were repeat interviews carried out? If yes, how many?                                                                                                     | N/A        |
| 19.                                            | Audio/visual recording                   | Did the research use audio or visual recording to collect the data?                                                                                       | 7          |
| 20.                                            | Field notes                              | Were field notes made during and/or after the interview or focus group?                                                                                   | 7          |
| 21.                                            | Duration                                 | What was the duration of the interviews or focus group?                                                                                                   | 6          |
| 22.                                            | Data saturation                          | Was data saturation discussed?                                                                                                                            | 6          |
| 23.                                            | Transcripts returned                     | Were transcripts returned to participants for comment and/or correction?                                                                                  | 8          |

| No.                                    | Item                           | Guide questions/description                                                                                                      | Section |
|----------------------------------------|--------------------------------|----------------------------------------------------------------------------------------------------------------------------------|---------|
| <b>Domain 3: analysis and findings</b> |                                |                                                                                                                                  |         |
| Data analysis                          |                                |                                                                                                                                  |         |
| 24.                                    | Number of data coders          | How many data coders coded the data?                                                                                             | N/A     |
| 25.                                    | Description of the coding tree | Did authors provide a description of the coding tree?                                                                            | N/A     |
| 26.                                    | Derivation of themes           | Were themes identified in advance or derived from the data?                                                                      | N/A     |
| 27.                                    | Software                       | What software, if applicable, was used to manage the data?                                                                       | 6-7     |
| 28.                                    | Participant checking           | Did participants provide feedback on the findings?                                                                               | 8       |
| Reporting                              |                                |                                                                                                                                  |         |
| 29.                                    | Quotations presented           | Were participant quotations presented to illustrate the themes/findings? Was each quotation identified? e.g., participant number | N/A     |
| 30.                                    | Data and findings consistent   | Was there consistency between the data presented and the findings?                                                               | 9       |
| 31.                                    | Clarity of major themes        | Were major themes clearly presented in the findings?                                                                             | N/A     |
| 32.                                    | Clarity of minor themes        | Is there a description of diverse cases or discussion of minor themes?                                                           | N/A     |

**Taken from:** Tong A, Sainsbury P, Craig J. Consolidated criteria for reporting qualitative research (COREQ): a 32-item checklist for interviews and focus groups. *Int J Qual Health Care*. 2007;19(6):349-357. doi:10.1093/intqhc/mzm042

**Question on gender omitted in response to recent update:** Albury C, Pope C, Shaw S, et al. Gender in the consolidated criteria for reporting qualitative research (COREQ) checklist. *International Journal for Quality in Health Care*. 2021;33(4):2021. doi:10.1093/intqhc/mzab12

Appendix 2: Maps 1-4 produced by each workshop

Workshop 1 Map

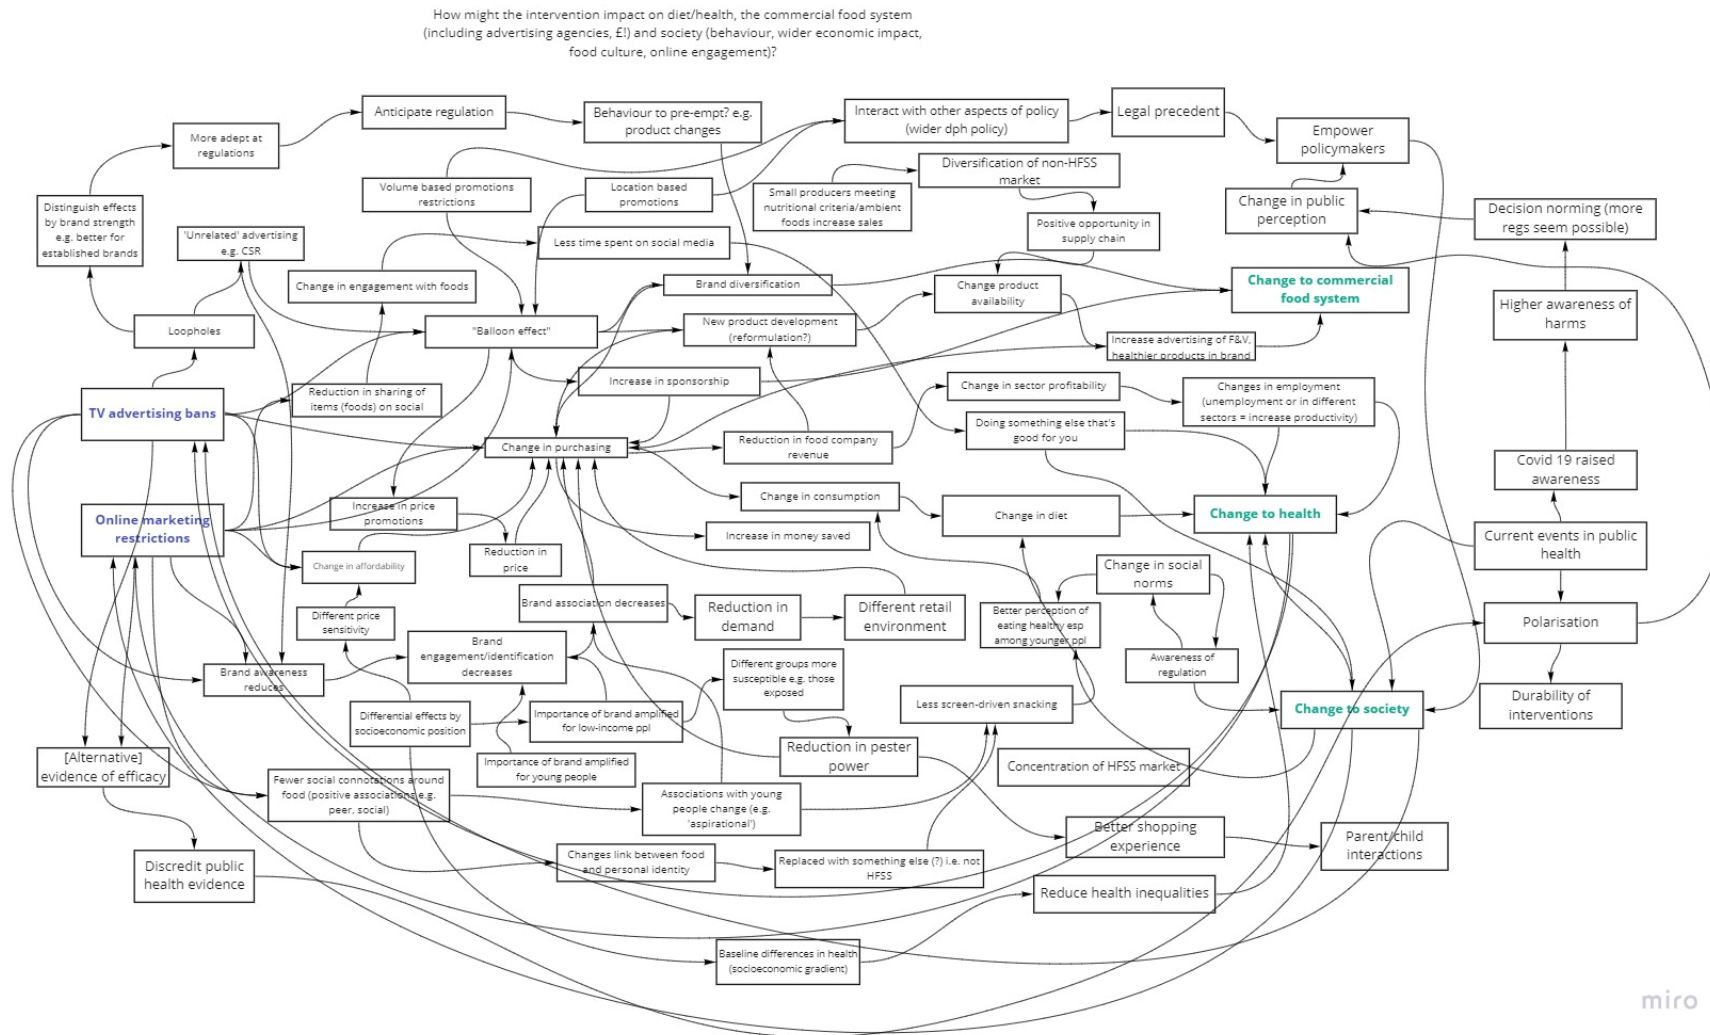

miro

### Workshop 2 Map

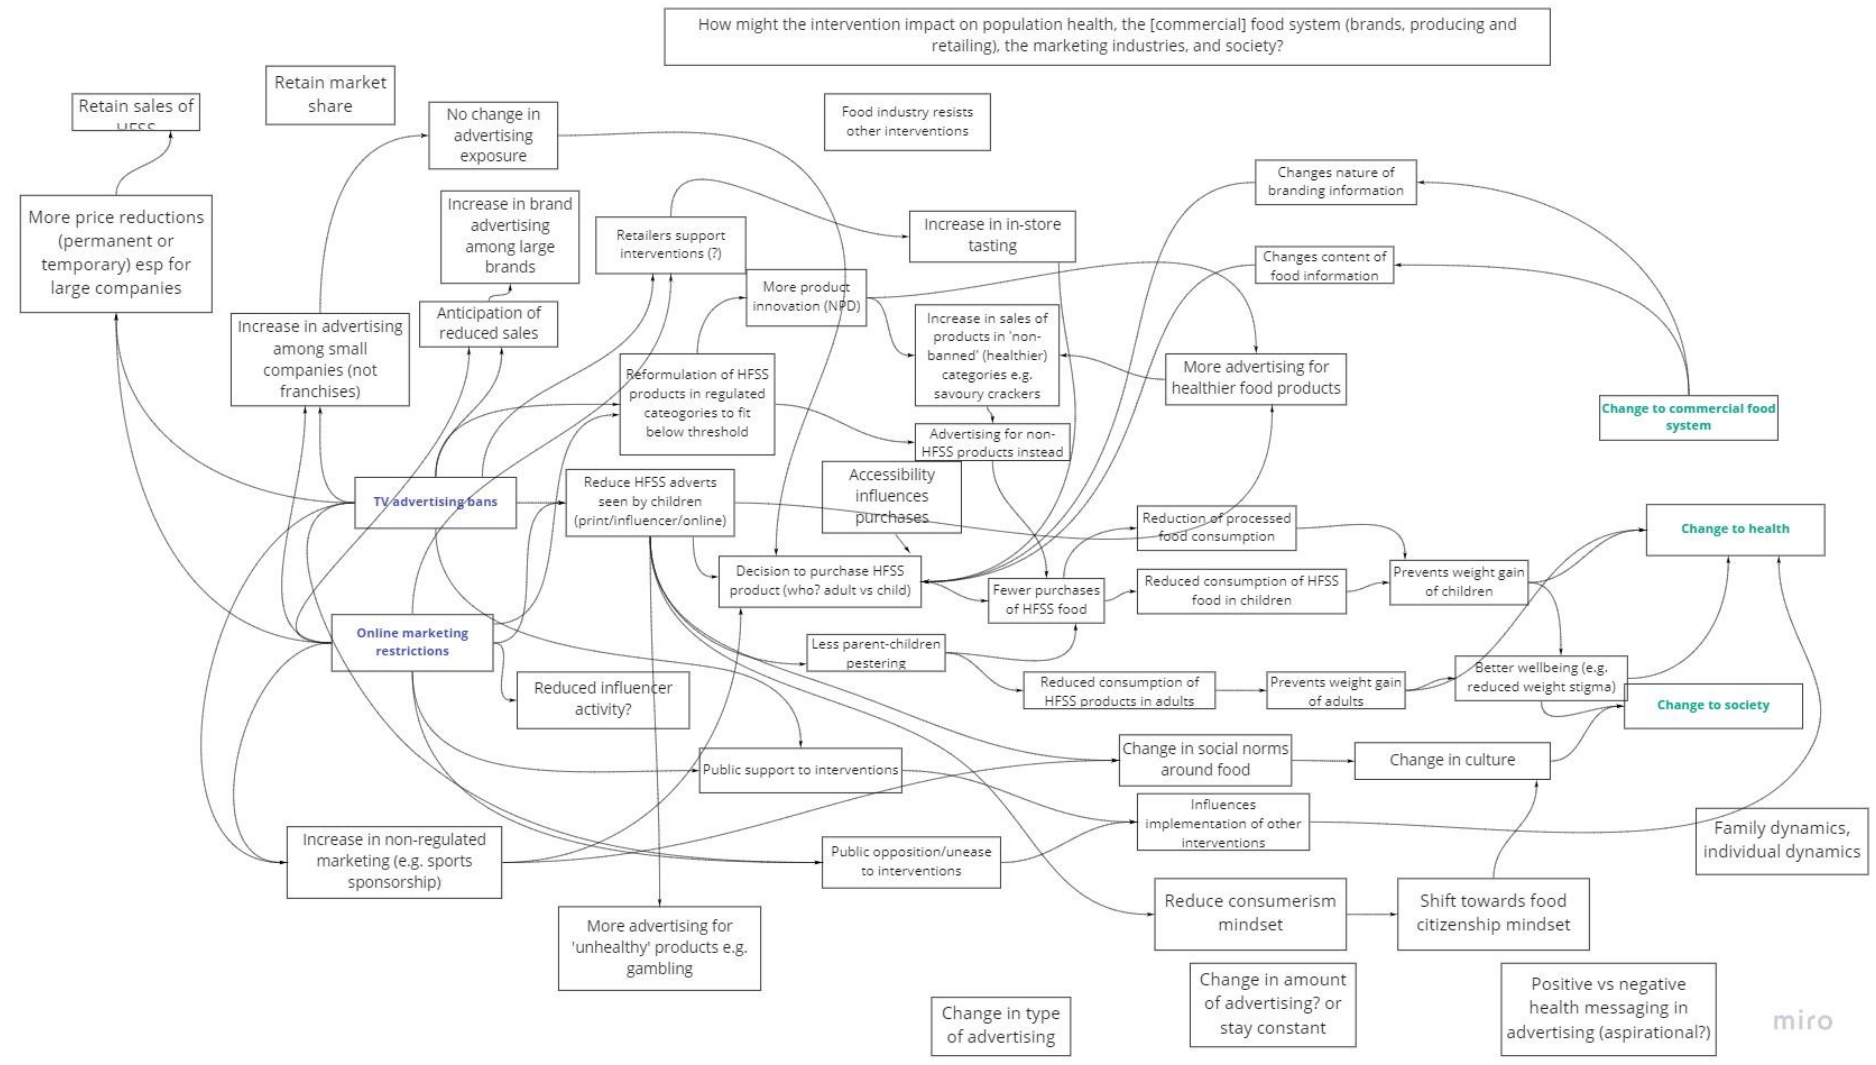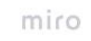







### Appendix 3: Concepts from workshop maps and resulting concepts in the final map

| Workshop 1 (non-industry)                    | Workshop 2 (non-industry)        | Workshop 3 (non-industry)         | Workshop 4 (industry)                                                            | Final map                                          |
|----------------------------------------------|----------------------------------|-----------------------------------|----------------------------------------------------------------------------------|----------------------------------------------------|
| More adept at regulations                    | Anticipation of reduced sales    | Anticipating further restrictions |                                                                                  |                                                    |
| Behaviour to pre-empt? e.g., product changes |                                  | Proposals implemented by law      |                                                                                  | <b>Anticipation</b>                                |
| Anticipate regulation                        |                                  |                                   |                                                                                  |                                                    |
| Change product availability                  |                                  |                                   | Affects food availability                                                        | <b>Availability of HFSS products</b>               |
|                                              | Prevents weight gain of children | Changes to weight                 |                                                                                  | <b>Bodyweight</b>                                  |
|                                              | Prevents weight gain of adults   |                                   |                                                                                  |                                                    |
|                                              |                                  | Decrease in calorie consumption   | Reduced calorie intake                                                           | <b>Calorie consumption</b>                         |
| Parent/child interactions                    | Less parent-children pestering   |                                   |                                                                                  | <b>Child purchasing requests for HFSS products</b> |
| Reduction in pester power                    |                                  |                                   |                                                                                  |                                                    |
| Better shopping experience                   |                                  |                                   |                                                                                  | <b>Commercial food system</b>                      |
|                                              |                                  |                                   | {within company} companies are more engaged with health policies? Health issues? | <b>Company engagement with health issues</b>       |
|                                              |                                  |                                   | Health embedded in strategy (non-negotiable)                                     |                                                    |
|                                              |                                  |                                   | Easier for nutritionists to communicate with marketing teams                     |                                                    |
| Reduction in food company revenue            |                                  |                                   | Restricts ability to attain profits by selling less healthy products             | <b>Company profitability</b>                       |

1  
2  
3  
4  
5  
6  
7  
8  
9  
10  
11  
12  
13  
14  
15  
16  
17  
18  
19  
20  
21  
22  
23  
24  
25  
26  
27  
28  
29  
30  
31  
32  
33  
34  
35  
36  
37  
38  
39  
40  
41  
42  
43  
44  
45  
46

| Workshop 1 (non-industry)                | Workshop 2 (non-industry)                        | Workshop 3 (non-industry)                                            | Workshop 4 (industry)                                        | Final map                                     |
|------------------------------------------|--------------------------------------------------|----------------------------------------------------------------------|--------------------------------------------------------------|-----------------------------------------------|
| Change in sector profitability           |                                                  |                                                                      | Cost/burden of enforcement to e.g. ASA (funded by whom?)     |                                               |
|                                          |                                                  |                                                                      | Inefficiencies = costly                                      |                                               |
| Less screen-driven snacking              | Reduced consumption of HFSS products in adults   | Reduced purchasing/ consumption of HFSS                              | Consumption of some HFSS products sustained                  | <b>Consumption of regulated HFSS products</b> |
| Change in consumption                    | Reduction of processed food consumption          |                                                                      |                                                              |                                               |
| Doing something else that's good for you | Reduced consumption of HFSS products in children |                                                                      |                                                              |                                               |
| Change in diet                           |                                                  |                                                                      |                                                              | <b>Consumption of unregulated products</b>    |
|                                          |                                                  | Applies specific definition of HFSS - poor definitions of categories | Inconsistencies between different policies and criteria      | <b>Definitions</b>                            |
|                                          |                                                  | Enforcement based on company-provided info                           |                                                              |                                               |
|                                          |                                                  | Lack of info to use/verify for NPM                                   |                                                              |                                               |
| Reduction in demand                      |                                                  |                                                                      |                                                              | <b>Demand for regulated HFSS products</b>     |
| Increase in money saved                  |                                                  |                                                                      |                                                              |                                               |
|                                          |                                                  |                                                                      | Consumer demands may be lower for reformulated alternatives? | <b>Demand for unregulated products</b>        |
|                                          |                                                  | Increase in user surveillance activity                               |                                                              | <b>Digital surveillance</b>                   |
|                                          |                                                  | Infringing Child's rights not to be under surveillance?              |                                                              |                                               |
|                                          |                                                  | Increase in surveillance activity                                    |                                                              |                                               |

| Workshop 1 (non-industry)                                | Workshop 2 (non-industry)                                            | Workshop 3 (non-industry)                                       | Workshop 4 (industry)                                                                 | Final map                                                  |
|----------------------------------------------------------|----------------------------------------------------------------------|-----------------------------------------------------------------|---------------------------------------------------------------------------------------|------------------------------------------------------------|
|                                                          |                                                                      | Increase in data collated about children/young people           |                                                                                       |                                                            |
| Changes in employment                                    |                                                                      | Incentive to not expand beyond 250 employees                    |                                                                                       | <b>Employment</b>                                          |
| Reductions in sharing of foods on social media           | No change in advertising exposure                                    | Exposure to fewer HFSS adverts                                  | Less exposure to ads overall                                                          | <b>Exposure to advertising for regulated HFSS products</b> |
|                                                          | Reduced influencer activity?                                         | Children's exposure to TV advertising less affected than adults | Reduce exposure to HFSS ads (inc. through click through)                              |                                                            |
|                                                          | Change in amount of advertising or stay constant                     | Advertising has fewer implicit effects                          | Market HFSS products based on taste                                                   |                                                            |
|                                                          | Reduce HFSS adverts seen by children                                 | More powerful                                                   | Only HFSS advertised post-9pm (more competitive)                                      |                                                            |
|                                                          | Positive vs. negative health messaging in advertising (aspirational) | Virtue signalling                                               |                                                                                       |                                                            |
|                                                          | Changes content of food information                                  | Harder to distinguish between different food/drinks companies   |                                                                                       |                                                            |
|                                                          |                                                                      | Iterative approach to augmenting online adverts                 |                                                                                       |                                                            |
| Replaced with something else (?) i.e., not HFSS          | Advertising for non-HFSS products instead                            | Exposure to non-HFSS adverts                                    | Focus marketing on lower sugar brands e.g., reformulated products from other measures | <b>Exposure to advertising for unregulated products</b>    |
| Increase advertising of F&V, healthier products in brand | More advertising for healthier food products                         | Increased advertising for healthier products                    | More value deals are healthier                                                        |                                                            |
|                                                          | More advertising for 'unhealthy products' e.g., gambling             | Increase in exposure to 'other' adverts                         | Cost of advertising slots after 9pm become very expensive                             |                                                            |
|                                                          |                                                                      | Continued advertising of salty products                         |                                                                                       |                                                            |
|                                                          |                                                                      | Increased advertising for food delivery companies               |                                                                                       |                                                            |

1  
2  
3  
4  
5  
6  
7  
8  
9  
10  
11  
12  
13  
14  
15  
16  
17  
18  
19  
20  
21  
22  
23  
24  
25  
26  
27  
28  
29  
30  
31  
32  
33  
34  
35  
36  
37  
38  
39  
40  
41  
42  
43  
44  
45  
46

| Workshop 1 (non-industry)                 | Workshop 2 (non-industry)                                      | Workshop 3 (non-industry)                                               | Workshop 4 (industry)                                                                                                                                        | Final map                                                 |
|-------------------------------------------|----------------------------------------------------------------|-------------------------------------------------------------------------|--------------------------------------------------------------------------------------------------------------------------------------------------------------|-----------------------------------------------------------|
| Balloon effect                            | Change in type of advertising                                  | Increase in exposure to online, personalised/targeted advertising       | Difficult to market fruit and veg as part of a meal (which may include HFSS e.g., Christmas) - depends on how regulation is specified e.g. 'hero' ingredient | <b>Exposure to unregulated marketing of HFSS products</b> |
| Increase in sponsorship                   | Increase in non-regulated marketing (e.g., sports sponsorship) | Advertising continues to appeal to children                             | Not able to show healthy food in context                                                                                                                     |                                                           |
| 'Unrelated' advertising e.g., CSR         | Increase in in-store tasting                                   | Companies able to bypass enforcement                                    | Not able to show 'treat' foods in appropriate                                                                                                                |                                                           |
| Loopholes                                 | More price reductions especially for large companies           | Increase in online advertising (hard to measure)                        | Hard to make healthy products desirable                                                                                                                      |                                                           |
| Location based promotions                 | Increase in advertising among small companies (not franchises) | Companies able to bypass loopholes online                               | Focus diverted away from reformulation if unable to advertise                                                                                                |                                                           |
| Increase in price promotions              | Changes nature of branding information                         | Shift in how sugary drinks are advertised (alcohol alternatives)        | Not able to advertise cooking/food culture                                                                                                                   |                                                           |
| Brand awareness reduces                   | Increase in brand advertising among large brands               | Reduction in offline advertising (e.g., TV, print - easy to measure)    | Find alternative ways to market existing products (no product change)                                                                                        |                                                           |
| Brand engagement/identification decreases |                                                                | Continued advertising of products in large portions e.g., fried chicken | Innovation in targeting adults with marketing                                                                                                                |                                                           |
| Brand association decreases               |                                                                | Advertising HFSS by stealth                                             |                                                                                                                                                              |                                                           |
|                                           |                                                                | Increase in other forms of price promotion?                             |                                                                                                                                                              |                                                           |
|                                           |                                                                | Regulation unable to capture what is appealing to children              |                                                                                                                                                              |                                                           |
|                                           | Better wellbeing (e.g., reduced weight stigma)                 |                                                                         |                                                                                                                                                              | <b>Health</b>                                             |
| Alternative evidence of efficacy          | Food industry resists other interventions                      | Industry able to lobby against policies in future                       |                                                                                                                                                              | <b>Lobbying against further interventions</b>             |

| Workshop 1 (non-industry)                | Workshop 2 (non-industry)                                                     | Workshop 3 (non-industry)                                               | Workshop 4 (industry)                                                                                         | Final map                                          |
|------------------------------------------|-------------------------------------------------------------------------------|-------------------------------------------------------------------------|---------------------------------------------------------------------------------------------------------------|----------------------------------------------------|
| Discredit public health evidence         |                                                                               |                                                                         |                                                                                                               |                                                    |
| Concentration of HFSS market             | Retain market share                                                           | Large companies continue to dominate food system                        |                                                                                                               | <b>Market share</b>                                |
|                                          |                                                                               | Atomisation?                                                            |                                                                                                               |                                                    |
|                                          |                                                                               | Continued advertising of products in large portions e.g., fried chicken | No incentive to market smaller products/portion sizes e.g., because based on NPM, content per 100g            | <b>Portion size</b>                                |
| Change in affordability                  | More price reductions especially for large companies                          | Increase in other forms of price promotion?                             | Increase in product prices                                                                                    | <b>Price</b>                                       |
|                                          |                                                                               |                                                                         | Harder to run value deals e.g., price matching competitors                                                    |                                                    |
| Diversification of non-HFSS markets      | More product innovation (NPD)                                                 | NPD for non-HFSS products                                               | Could lead to NPD for exempt categories                                                                       | <b>Product innovation for unregulated products</b> |
| Positive opportunity in supply chain     | Reformulation of HFSS products in regulated categories to fit below threshold | Reformulation towards salty products                                    | Some categories of food are hard to change                                                                    |                                                    |
| Brand diversification                    |                                                                               | Reduced incentive to produce HFSS                                       | NPD [and marketing] becomes difficult                                                                         |                                                    |
| New product development (reformulation?) |                                                                               | Increased incentive to produce artificially sweetened products          | No incentive to change products to meet threshold i.e., binary assessment is unattainable for some categories |                                                    |
|                                          |                                                                               |                                                                         | No change or incentive to change for exempt categories                                                        |                                                    |
|                                          |                                                                               |                                                                         | Innovation in product and ingredient development                                                              |                                                    |
| Change in public perception              |                                                                               |                                                                         |                                                                                                               |                                                    |
| Awareness of regulation                  |                                                                               |                                                                         |                                                                                                               |                                                    |
| Higher awareness of harms                |                                                                               |                                                                         |                                                                                                               |                                                    |
| <b>Public awareness</b>                  |                                                                               |                                                                         |                                                                                                               |                                                    |

1  
2  
3  
4  
5  
6  
7  
8  
9  
10  
11  
12  
13  
14  
15  
16  
17  
18  
19  
20  
21  
22  
23  
24  
25  
26  
27  
28  
29  
30  
31  
32  
33  
34  
35  
36  
37  
38  
39  
40  
41  
42  
43  
44  
45  
46

| Workshop 1 (non-industry)                                           | Workshop 2 (non-industry)                                                                 | Workshop 3 (non-industry)                                  | Workshop 4 (industry)                                                                                                 | Final map                                   |
|---------------------------------------------------------------------|-------------------------------------------------------------------------------------------|------------------------------------------------------------|-----------------------------------------------------------------------------------------------------------------------|---------------------------------------------|
| Better perception of eating healthy especially among younger people | Public support for interventions                                                          |                                                            | Difficult to articulate to the public                                                                                 | <b>Public support</b>                       |
|                                                                     | Public opposition/unease to interventions                                                 |                                                            |                                                                                                                       |                                             |
| Change in purchasing                                                | Decision to purchase HFSS product (who? Adult vs child)                                   | Reduced purchasing/consumption of HFSS                     | Reduced purchases of HFSS                                                                                             | <b>Purchases of HFSS regulated products</b> |
|                                                                     | Fewer purchases of HFSS food                                                              |                                                            |                                                                                                                       |                                             |
|                                                                     | Retain sales of HFSS                                                                      |                                                            |                                                                                                                       | <b>Purchases of unregulated products</b>    |
| Change in purchasing                                                | Increase in sales of products in 'non-banned' healthier categories e.g., savoury crackers | Increased availability of salty products                   |                                                                                                                       |                                             |
|                                                                     |                                                                                           | Increase in production/sales of low or no alcoholic drinks |                                                                                                                       | <b>Regulatory and political landscape</b>   |
| Durability of interventions                                         | Retailers support interventions                                                           | Volume-based price promotion restrictions                  | Wider political landscape (e.g., Brexit) other burdensome policies (e.g., plastic tax, covid)                         |                                             |
| Interact with other aspects of DPH policy                           |                                                                                           | Location-based price promotion restrictions                | Volume and location price policies                                                                                    | <b>Regulatory and political landscape</b>   |
| Location based promotions                                           |                                                                                           | Other restrictions warranted                               | Unnecessarily complicated landscape of policies to meet the same goal = costly                                        |                                             |
| Covid-19 raised awareness                                           |                                                                                           | Reinforces reformulation as 'solution'                     | Potential for a level playing field (if clear guidance)                                                               |                                             |
| Current events in public health                                     |                                                                                           | Tax breaks/ad subsidy for SMEs producing healthy foods (?) | Insufficient warning to respond                                                                                       |                                             |
| Volume based promotions restrictions                                |                                                                                           |                                                            | Difficult to implement e.g., differences in affected categories                                                       | <b>Regulatory and political landscape</b>   |
|                                                                     |                                                                                           |                                                            | Packaged products not able to go at the front of store based on conditions for restrictions (packaged/HFSS/product in |                                             |

| Workshop 1 (non-industry)                                                | Workshop 2 (non-industry)                                      | Workshop 3 (non-industry)                                        | Workshop 4 (industry)                                                                       | Final map                        |
|--------------------------------------------------------------------------|----------------------------------------------------------------|------------------------------------------------------------------|---------------------------------------------------------------------------------------------|----------------------------------|
|                                                                          |                                                                |                                                                  | scope) - may relate to available nutritional info)                                          |                                  |
| Legal precedent                                                          | Influences implementation of other interventions               | Influences capacity to make future policies for HFSS             |                                                                                             | <b>Regulatory precedent</b>      |
| Decision norming (more regs seem possible)                               |                                                                | Confusion for future policies for HFSS/loss of objectivity       |                                                                                             |                                  |
| Empower policymakers                                                     |                                                                | Increase in government sanctioned digital verification           |                                                                                             |                                  |
|                                                                          |                                                                | Reduced risk of various NCDs                                     |                                                                                             | <b>Risk of diet-related NCDs</b> |
| Fewer social connotations around food                                    | Change in social norms around food                             | Influences social norms e.g., social cooling                     |                                                                                             | <b>Social norms around food</b>  |
| Changes in social norms                                                  | Family dynamics, individual dynamics                           | Reduction in normalisation of HFSS                               |                                                                                             |                                  |
| Change in engagement with foods                                          |                                                                | Limits changes to food norms                                     |                                                                                             |                                  |
| Associations with young people change (e.g., aspirational)               |                                                                | Greater influence on social/food norms                           |                                                                                             |                                  |
|                                                                          |                                                                |                                                                  |                                                                                             | <b>Society</b>                   |
| Changes link between food and personal identity                          | Shift towards food citizenship mindset                         |                                                                  |                                                                                             | <b>Societal shifts</b>           |
| Different retail environment                                             | Reduce consumerism mindset                                     |                                                                  |                                                                                             |                                  |
| Less time spent on social media                                          | Change in culture                                              |                                                                  |                                                                                             |                                  |
| Polarisation                                                             |                                                                |                                                                  |                                                                                             |                                  |
| Small producers meeting nutritional criteria/ambient food increase sales | Accessibility influences purchases                             | Increase in advertising from SMEs? If they can afford to compete | Companies with small portfolio of HFSS products most affected? e.g., chocolate              | <b>Changes vary by...</b>        |
| Different price sensitivity                                              | Increase in advertising among small companies (not franchises) | Sustained sales of HFSS from SMEs                                | Those already experiencing overweight may be more likely to benefit (higher base exposure?) |                                  |
| Importance of brand amplified for low-income people                      |                                                                | Effects differ by age?                                           | Disproportionately affects low-income people                                                |                                  |



1  
2  
3  
4  
5  
6  
7  
8  
9  
10  
11  
12  
13  
14  
15  
16  
17  
18  
19  
20  
21  
22  
23  
24  
25  
26  
27  
28  
29  
30  
31  
32  
33  
34  
35  
36  
37  
38  
39  
40  
41  
42  
43  
44  
45  
46

| Workshop 1 (non-industry)                                                 | Workshop 2 (non-industry) | Workshop 3 (non-industry)                   | Workshop 4 (industry) | Final map |
|---------------------------------------------------------------------------|---------------------------|---------------------------------------------|-----------------------|-----------|
| Importance of brand amplified for young people                            |                           | Socioeconomic position                      |                       |           |
| Different groups more susceptible e.g., those exposed                     |                           | Adolescents more susceptible to advertising |                       |           |
| Differential effects by socioeconomic position                            |                           |                                             |                       |           |
| Baseline differences in health (socioeconomic gradient)                   |                           |                                             |                       |           |
| Reduce health inequalities                                                |                           |                                             |                       |           |
| Distinguish effects by brand strength e.g., better for established brands |                           |                                             |                       |           |

Notes: HFSS: high fat, salt and sugar; NCD: non-communicable disease; NPD: new product development; NPM: Nutrient Profile Model; SME: small and medium enterprises.
