# Supplementary material for: Exploring the potential impact of the proposed UK TV and online food advertising regulations: a concept mapping study
Source: PubMed Central journal article supplement (PMC9207937; doi:10.1136/bmjopen-2021-060302), 2022-06-16
Supplement: bmjopen-2021-060302supp001.pdf [file bmjopen-2021-060302supp001.pdf]

**Appendix 1: Consolidated criteria for reporting qualitative studies (COREQ): 32-item checklist**

| No.                                            | Item                                     | Guide questions/description                                                                                                                               | Section    |
|------------------------------------------------|------------------------------------------|-----------------------------------------------------------------------------------------------------------------------------------------------------------|------------|
| <b>Domain 1: Research team and reflexivity</b> |                                          |                                                                                                                                                           |            |
| Personal characteristics                       |                                          |                                                                                                                                                           |            |
| 1.                                             | Interviewer/facilitator                  | Which author/s conducted the interviews or focus groups?                                                                                                  | 6          |
| 2.                                             | Credentials                              | What were the researcher's credentials? e.g., PhD, MD                                                                                                     | Title page |
| 3.                                             | Occupation                               | What was their occupation at the time of the study?                                                                                                       | Title page |
| 4.                                             | Gender                                   | Was the researcher male or female?                                                                                                                        | See note   |
| 5.                                             | Experience and training                  | What experience or training did the researcher have?                                                                                                      | 6          |
| Relationship with participants                 |                                          |                                                                                                                                                           |            |
| 6.                                             | Relationship established                 | Was a relationship established prior to study commencement?                                                                                               | 6          |
| 7.                                             | Participant knowledge of the interviewer | What did the participants know about the research? e.g., personal goals, reasons for doing the research                                                   | 6          |
| 8.                                             | Interviewer characteristics              | What characteristics were reported about the interviewer/facilitator? e.g., bias, assumptions, reasons and interests in the research topic                | N/A        |
| <b>Domain 2: study design</b>                  |                                          |                                                                                                                                                           |            |
| Theoretical framework                          |                                          |                                                                                                                                                           |            |
| 9.                                             | Methodological orientation and Theory    | What methodological orientation was stated to underpin the study? e.g., grounded theory, discourse analysis, ethnography, phenomenology, content analysis | 6          |
| Participant selection                          |                                          |                                                                                                                                                           |            |
| 10.                                            | Sampling                                 | How were the participants selected? e.g., purposive, convenience, consecutive, snowball                                                                   | 6          |
| 11.                                            | Method of approach                       | How were participants approached? e.g., face-to-face, telephone, mail, email                                                                              | 6          |
| 12.                                            | Sample size                              | How many participants were in the study?                                                                                                                  | 8          |
| 13.                                            | Non-participation                        | How many people refused to participate or dropped out? Reasons?                                                                                           | N/A        |
| Setting                                        |                                          |                                                                                                                                                           |            |
| 14.                                            | Setting of data collection               | Where was the data collected? e.g., home, clinic, workplace                                                                                               | 6-7        |
| 15.                                            | Presence of non-participants             | Was anyone else present besides the participants and researchers?                                                                                         | N/A        |
| 16.                                            | Description of sample                    | What are the important characteristics in the sample? e.g., demographic data, date                                                                        | 8          |
| Data collection                                |                                          |                                                                                                                                                           |            |
| 17.                                            | Interview guide                          | Were questions, prompts, guides provided by the authors? Was it pilot tested?                                                                             | 6          |
| 18.                                            | Repeat interviews                        | Were repeat interviews carried out? If yes, how many?                                                                                                     | N/A        |
| 19.                                            | Audio/visual recording                   | Did the research use audio or visual recording to collect the data?                                                                                       | 7          |
| 20.                                            | Field notes                              | Were field notes made during and/or after the interview or focus group?                                                                                   | 7          |
| 21.                                            | Duration                                 | What was the duration of the interviews or focus group?                                                                                                   | 6          |
| 22.                                            | Data saturation                          | Was data saturation discussed?                                                                                                                            | 6          |
| 23.                                            | Transcripts returned                     | Were transcripts returned to participants for comment and/or correction?                                                                                  | 8          |

| No.                                    | Item                           | Guide questions/description                                                                                                      | Section |
|----------------------------------------|--------------------------------|----------------------------------------------------------------------------------------------------------------------------------|---------|
| <b>Domain 3: analysis and findings</b> |                                |                                                                                                                                  |         |
| Data analysis                          |                                |                                                                                                                                  |         |
| 24.                                    | Number of data coders          | How many data coders coded the data?                                                                                             | N/A     |
| 25.                                    | Description of the coding tree | Did authors provide a description of the coding tree?                                                                            | N/A     |
| 26.                                    | Derivation of themes           | Were themes identified in advance or derived from the data?                                                                      | N/A     |
| 27.                                    | Software                       | What software, if applicable, was used to manage the data?                                                                       | 6-7     |
| 28.                                    | Participant checking           | Did participants provide feedback on the findings?                                                                               | 8       |
| Reporting                              |                                |                                                                                                                                  |         |
| 29.                                    | Quotations presented           | Were participant quotations presented to illustrate the themes/findings? Was each quotation identified? e.g., participant number | N/A     |
| 30.                                    | Data and findings consistent   | Was there consistency between the data presented and the findings?                                                               | 9       |
| 31.                                    | Clarity of major themes        | Were major themes clearly presented in the findings?                                                                             | N/A     |
| 32.                                    | Clarity of minor themes        | Is there a description of diverse cases or discussion of minor themes?                                                           | N/A     |

**Taken from:** Tong A, Sainsbury P, Craig J. Consolidated criteria for reporting qualitative research (COREQ): a 32-item checklist for interviews and focus groups. *Int J Qual Health Care*. 2007;19(6):349-357. doi:10.1093/intqhc/mzm042

**Question on gender omitted in response to recent update:** Albury C, Pope C, Shaw S, et al. Gender in the consolidated criteria for reporting qualitative research (COREQ) checklist. *International Journal for Quality in Health Care*. 2021;33(4):2021. doi:10.1093/intqhc/mzab12
