# Supplementary material for: Exploring the potential impact of the proposed UK TV and online food advertising regulations: a concept mapping study
Source: PubMed Central journal article supplement (PMC9207937; doi:10.1136/bmjopen-2021-060302), 2022-06-16

Appendix 2: Maps 1-4 produced by each workshop

Workshop 1 Map

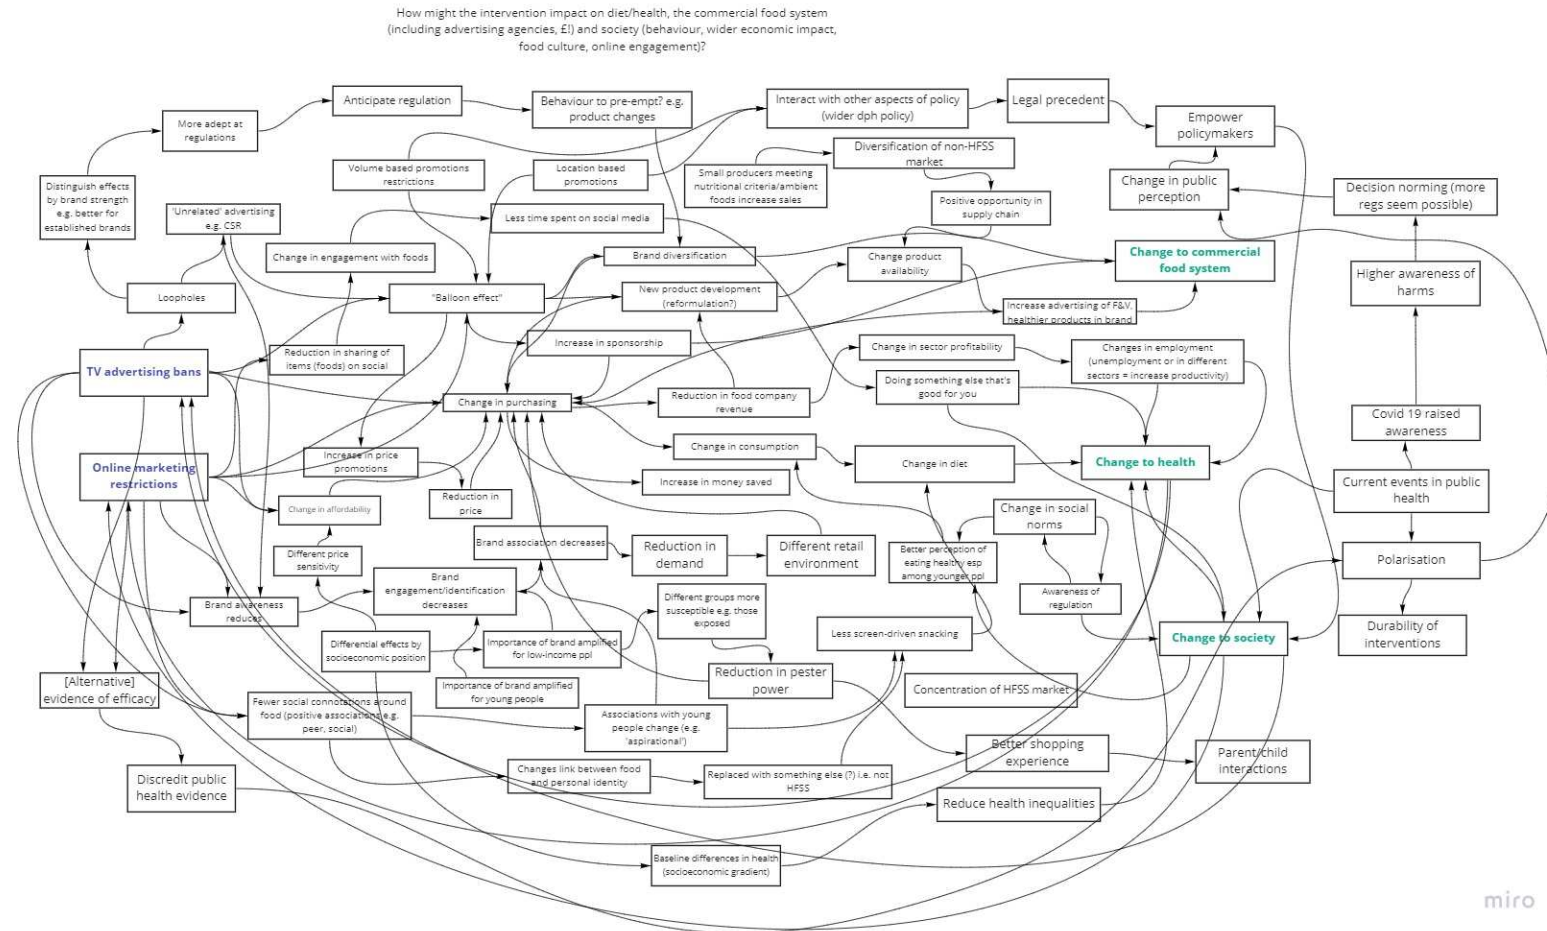



Workshop 3 Map

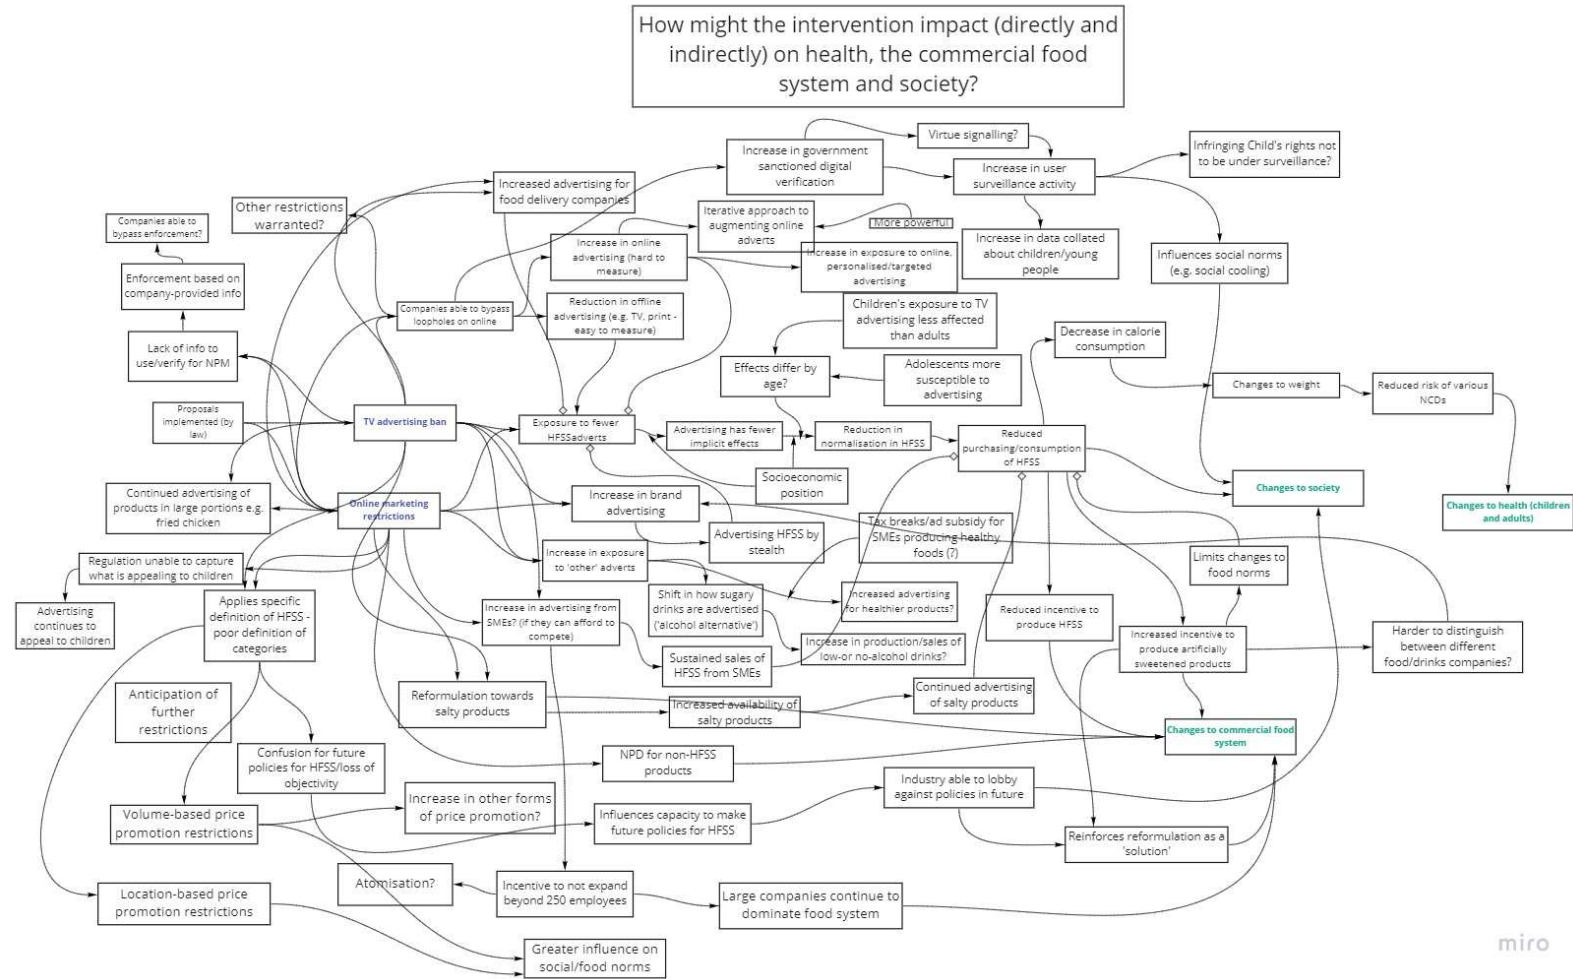

## Workshop 4 Map

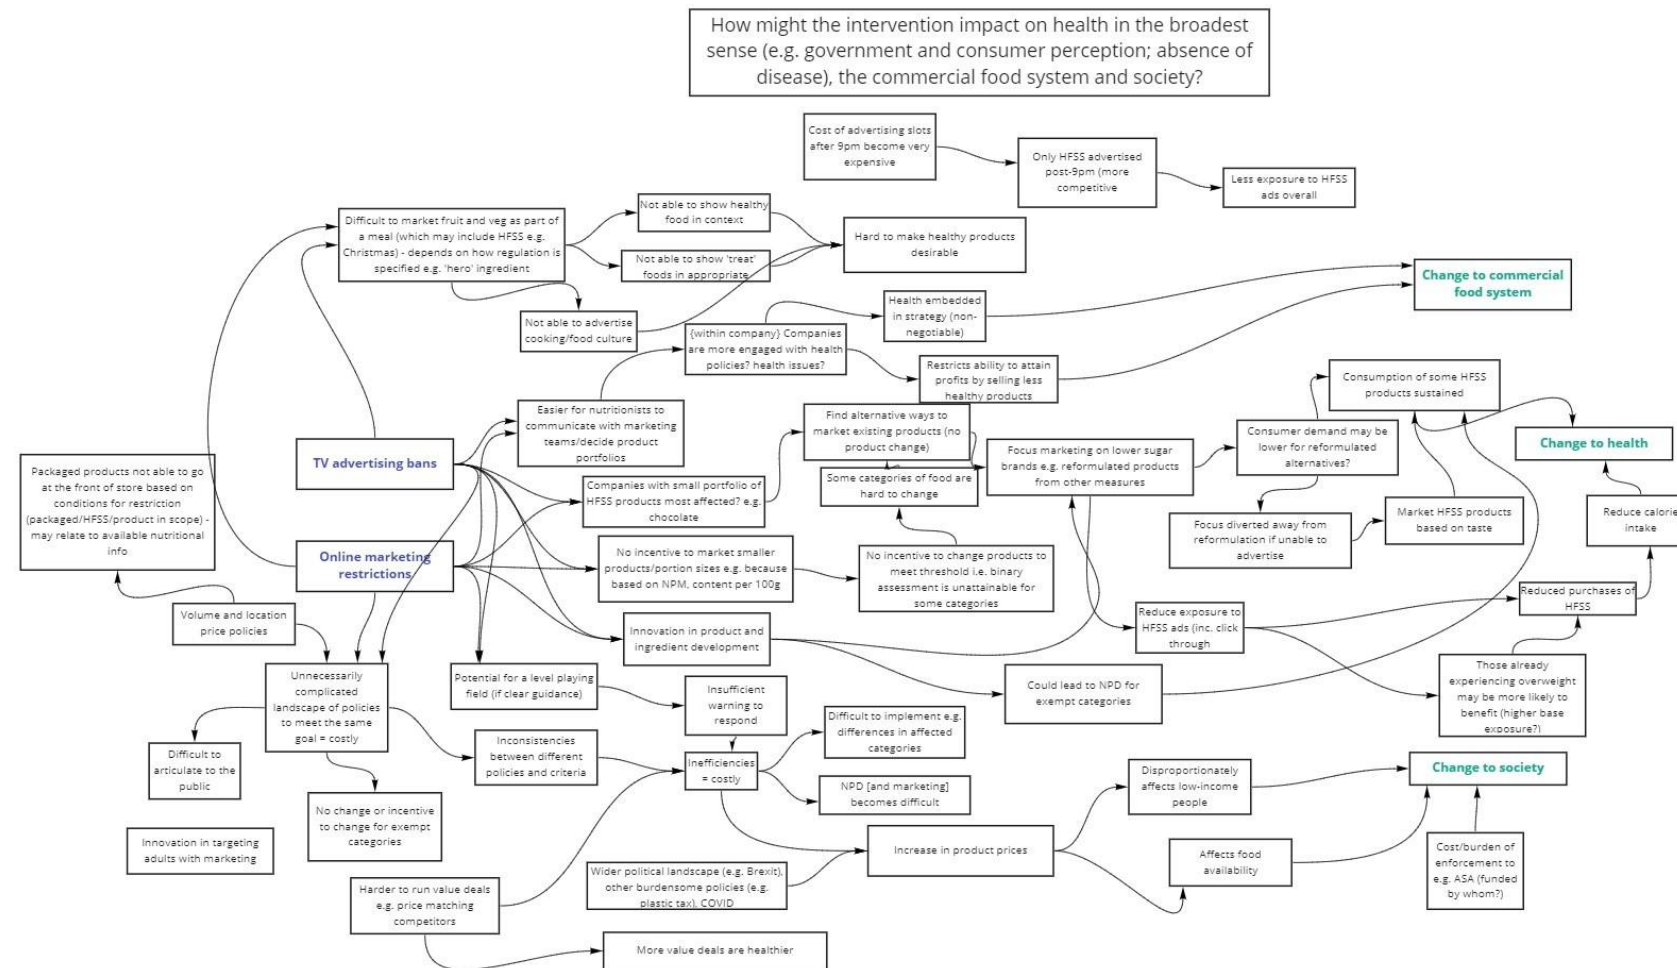

Supplement: bmjopen-2021-060302supp002.pdf [file bmjopen-2021-060302supp002.pdf]
