# Supplementary material for: Exploring the potential impact of the proposed UK TV and online food advertising regulations: a concept mapping study
Source: PubMed Central journal article supplement (PMC9207937; doi:10.1136/bmjopen-2021-060302), 2022-06-16
Supplement: bmjopen-2021-060302supp003.pdf [file bmjopen-2021-060302supp003.pdf]

**Appendix 3: Concepts from workshop maps and resulting concepts in the final map**

| Workshop 1 (non-industry)                    | Workshop 2 (non-industry)        | Workshop 3 (non-industry)         | Workshop 4 (industry)                                                            | Final map                                          |
|----------------------------------------------|----------------------------------|-----------------------------------|----------------------------------------------------------------------------------|----------------------------------------------------|
| More adept at regulations                    | Anticipation of reduced sales    | Anticipating further restrictions |                                                                                  |                                                    |
| Behaviour to pre-empt? e.g., product changes |                                  | Proposals implemented by law      |                                                                                  | <b>Anticipation</b>                                |
| Anticipate regulation                        |                                  |                                   |                                                                                  |                                                    |
| Change product availability                  |                                  |                                   | Affects food availability                                                        | <b>Availability of HFSS products</b>               |
|                                              | Prevents weight gain of children | Changes to weight                 |                                                                                  | <b>Bodyweight</b>                                  |
|                                              | Prevents weight gain of adults   |                                   |                                                                                  |                                                    |
|                                              |                                  | Decrease in calorie consumption   | Reduced calorie intake                                                           | <b>Calorie consumption</b>                         |
| Parent/child interactions                    | Less parent-children pestering   |                                   |                                                                                  | <b>Child purchasing requests for HFSS products</b> |
| Reduction in pester power                    |                                  |                                   |                                                                                  |                                                    |
| Better shopping experience                   |                                  |                                   |                                                                                  | <b>Commercial food system</b>                      |
|                                              |                                  |                                   | {within company} companies are more engaged with health policies? Health issues? | <b>Company engagement with health issues</b>       |
|                                              |                                  |                                   | Health embedded in strategy (non-negotiable)                                     |                                                    |
|                                              |                                  |                                   | Easier for nutritionists to communicate with marketing teams                     |                                                    |
| Reduction in food company revenue            |                                  |                                   | Restricts ability to attain profits by selling less healthy products             | <b>Company profitability</b>                       |

| Workshop 1 (non-industry)                | Workshop 2 (non-industry)                        | Workshop 3 (non-industry)                                            | Workshop 4 (industry)                                        | Final map                                     |
|------------------------------------------|--------------------------------------------------|----------------------------------------------------------------------|--------------------------------------------------------------|-----------------------------------------------|
| Change in sector profitability           |                                                  |                                                                      | Cost/burden of enforcement to e.g. ASA (funded by whom?)     |                                               |
|                                          |                                                  |                                                                      | Inefficiencies = costly                                      |                                               |
| Less screen-driven snacking              | Reduced consumption of HFSS products in adults   | Reduced purchasing/consumption of HFSS                               | Consumption of some HFSS products sustained                  | <b>Consumption of regulated HFSS products</b> |
| Change in consumption                    | Reduction of processed food consumption          |                                                                      |                                                              |                                               |
| Doing something else that's good for you | Reduced consumption of HFSS products in children |                                                                      |                                                              |                                               |
| Change in diet                           |                                                  |                                                                      |                                                              | <b>Consumption of unregulated products</b>    |
|                                          |                                                  | Applies specific definition of HFSS - poor definitions of categories | Inconsistencies between different policies and criteria      | <b>Definitions</b>                            |
|                                          |                                                  | Enforcement based on company-provided info                           |                                                              |                                               |
|                                          |                                                  | Lack of info to use/verify for NPM                                   |                                                              |                                               |
| Reduction in demand                      |                                                  |                                                                      |                                                              | <b>Demand for regulated HFSS products</b>     |
| Increase in money saved                  |                                                  |                                                                      |                                                              |                                               |
|                                          |                                                  |                                                                      | Consumer demands may be lower for reformulated alternatives? | <b>Demand for unregulated products</b>        |
|                                          |                                                  | Increase in user surveillance activity                               |                                                              | <b>Digital surveillance</b>                   |
|                                          |                                                  | Infringing Child's rights not to be under surveillance?              |                                                              |                                               |
|                                          |                                                  | Increase in surveillance activity                                    |                                                              |                                               |

| Workshop 1 (non-industry)                                | Workshop 2 (non-industry)                                            | Workshop 3 (non-industry)                                       | Workshop 4 (industry)                                                                 | Final map                                                  |
|----------------------------------------------------------|----------------------------------------------------------------------|-----------------------------------------------------------------|---------------------------------------------------------------------------------------|------------------------------------------------------------|
|                                                          |                                                                      | Increase in data collated about children/young people           |                                                                                       |                                                            |
| Changes in employment                                    |                                                                      | Incentive to not expand beyond 250 employees                    |                                                                                       | <b>Employment</b>                                          |
| Reductions in sharing of foods on social media           | No change in advertising exposure                                    | Exposure to fewer HFSS adverts                                  | Less exposure to ads overall                                                          | <b>Exposure to advertising for regulated HFSS products</b> |
|                                                          | Reduced influencer activity?                                         | Children's exposure to TV advertising less affected than adults | Reduce exposure to HFSS ads (inc. through click through)                              |                                                            |
|                                                          | Change in amount of advertising or stay constant                     | Advertising has fewer implicit effects                          | Market HFSS products based on taste                                                   |                                                            |
|                                                          | Reduce HFSS adverts seen by children                                 | More powerful                                                   | Only HFSS advertised post-9pm (more competitive)                                      |                                                            |
|                                                          | Positive vs. negative health messaging in advertising (aspirational) | Virtue signalling                                               |                                                                                       |                                                            |
|                                                          | Changes content of food information                                  | Harder to distinguish between different food/drinks companies   |                                                                                       |                                                            |
|                                                          |                                                                      | Iterative approach to augmenting online adverts                 |                                                                                       |                                                            |
| Replaced with something else (?) i.e., not HFSS          | Advertising for non-HFSS products instead                            | Exposure to non-HFSS adverts                                    | Focus marketing on lower sugar brands e.g., reformulated products from other measures | <b>Exposure to advertising for unregulated products</b>    |
| Increase advertising of F&V, healthier products in brand | More advertising for healthier food products                         | Increased advertising for healthier products                    | More value deals are healthier                                                        |                                                            |
|                                                          | More advertising for 'unhealthy products' e.g., gambling             | Increase in exposure to 'other' adverts                         | Cost of advertising slots after 9pm become very expensive                             |                                                            |
|                                                          |                                                                      | Continued advertising of salty products                         |                                                                                       |                                                            |
|                                                          |                                                                      | Increased advertising for food delivery companies               |                                                                                       |                                                            |

| Workshop 1 (non-industry)                 | Workshop 2 (non-industry)                                      | Workshop 3 (non-industry)                                               | Workshop 4 (industry)                                                                                                                                        | Final map                                                 |
|-------------------------------------------|----------------------------------------------------------------|-------------------------------------------------------------------------|--------------------------------------------------------------------------------------------------------------------------------------------------------------|-----------------------------------------------------------|
| Balloon effect                            | Change in type of advertising                                  | Increase in exposure to online, personalised/targeted advertising       | Difficult to market fruit and veg as part of a meal (which may include HFSS e.g., Christmas) - depends on how regulation is specified e.g. 'hero' ingredient | <b>Exposure to unregulated marketing of HFSS products</b> |
| Increase in sponsorship                   | Increase in non-regulated marketing (e.g., sports sponsorship) | Advertising continues to appeal to children                             | Not able to show healthy food in context                                                                                                                     |                                                           |
| 'Unrelated' advertising e.g., CSR         | Increase in in-store tasting                                   | Companies able to bypass enforcement                                    | Not able to show 'treat' foods in appropriate                                                                                                                |                                                           |
| Loopholes                                 | More price reductions especially for large companies           | Increase in online advertising (hard to measure)                        | Hard to make healthy products desirable                                                                                                                      |                                                           |
| Location based promotions                 | Increase in advertising among small companies (not franchises) | Companies able to bypass loopholes online                               | Focus diverted away from reformulation if unable to advertise                                                                                                |                                                           |
| Increase in price promotions              | Changes nature of branding information                         | Shift in how sugary drinks are advertised (alcohol alternatives)        | Not able to advertise cooking/food culture                                                                                                                   |                                                           |
| Brand awareness reduces                   | Increase in brand advertising among large brands               | Reduction in offline advertising (e.g., TV, print - easy to measure)    | Find alternative ways to market existing products (no product change)                                                                                        |                                                           |
| Brand engagement/identification decreases |                                                                | Continued advertising of products in large portions e.g., fried chicken | Innovation in targeting adults with marketing                                                                                                                |                                                           |
| Brand association decreases               |                                                                | Advertising HFSS by stealth                                             |                                                                                                                                                              |                                                           |
|                                           |                                                                | Increase in other forms of price promotion?                             |                                                                                                                                                              |                                                           |
|                                           |                                                                | Regulation unable to capture what is appealing to children              |                                                                                                                                                              |                                                           |
|                                           | Better wellbeing (e.g., reduced weight stigma)                 |                                                                         |                                                                                                                                                              | <b>Health</b>                                             |
| Alternative evidence of efficacy          | Food industry resists other interventions                      | Industry able to lobby against policies in future                       |                                                                                                                                                              | <b>Lobbying against further interventions</b>             |

| Workshop 1 (non-industry)                | Workshop 2 (non-industry)                                                     | Workshop 3 (non-industry)                                               | Workshop 4 (industry)                                                                                         | Final map                                          |
|------------------------------------------|-------------------------------------------------------------------------------|-------------------------------------------------------------------------|---------------------------------------------------------------------------------------------------------------|----------------------------------------------------|
| Discredit public health evidence         |                                                                               |                                                                         |                                                                                                               |                                                    |
| Concentration of HFSS market             | Retain market share                                                           | Large companies continue to dominate food system                        |                                                                                                               | <b>Market share</b>                                |
|                                          |                                                                               | Atomisation?                                                            |                                                                                                               |                                                    |
|                                          |                                                                               | Continued advertising of products in large portions e.g., fried chicken | No incentive to market smaller products/portion sizes e.g., because based on NPM, content per 100g            | <b>Portion size</b>                                |
| Change in affordability                  | More price reductions especially for large companies                          | Increase in other forms of price promotion?                             | Increase in product prices                                                                                    | <b>Price</b>                                       |
| Reduction in price                       |                                                                               |                                                                         | Harder to run value deals e.g., price matching competitors                                                    |                                                    |
| Diversification of non-HFSS markets      | More product innovation (NPD)                                                 | NPD for non-HFSS products                                               | Could lead to NPD for exempt categories                                                                       | <b>Product innovation for unregulated products</b> |
| Positive opportunity in supply chain     | Reformulation of HFSS products in regulated categories to fit below threshold | Reformulation towards salty products                                    | Some categories of food are hard to change                                                                    |                                                    |
| Brand diversification                    |                                                                               | Reduced incentive to produce HFSS                                       | NPD [and marketing] becomes difficult                                                                         |                                                    |
| New product development (reformulation?) |                                                                               | Increased incentive to produce artificially sweetened products          | No incentive to change products to meet threshold i.e., binary assessment is unattainable for some categories |                                                    |
|                                          |                                                                               |                                                                         | No change or incentive to change for exempt categories                                                        |                                                    |
|                                          |                                                                               |                                                                         | Innovation in product and ingredient development                                                              |                                                    |
| Change in public perception              |                                                                               |                                                                         |                                                                                                               |                                                    |
| Awareness of regulation                  |                                                                               |                                                                         |                                                                                                               | <b>Public awareness</b>                            |
| Higher awareness of harms                |                                                                               |                                                                         |                                                                                                               |                                                    |

| Workshop 1 (non-industry)                                           | Workshop 2 (non-industry)                                                                 | Workshop 3 (non-industry)                                  | Workshop 4 (industry)                                                                                                 | Final map                                   |
|---------------------------------------------------------------------|-------------------------------------------------------------------------------------------|------------------------------------------------------------|-----------------------------------------------------------------------------------------------------------------------|---------------------------------------------|
| Better perception of eating healthy especially among younger people |                                                                                           |                                                            |                                                                                                                       |                                             |
|                                                                     | Public support for interventions                                                          |                                                            | Difficult to articulate to the public                                                                                 | <b>Public support</b>                       |
|                                                                     | Public opposition/unease to interventions                                                 |                                                            |                                                                                                                       |                                             |
| Change in purchasing                                                | Decision to purchase HFSS product (who? Adult vs child)                                   | Reduced purchasing/consumption of HFSS                     | Reduced purchases of HFSS                                                                                             | <b>Purchases of HFSS regulated products</b> |
|                                                                     | Fewer purchases of HFSS food                                                              |                                                            |                                                                                                                       |                                             |
|                                                                     | Retain sales of HFSS                                                                      |                                                            |                                                                                                                       |                                             |
| Change in purchasing                                                | Increase in sales of products in 'non-banned' healthier categories e.g., savoury crackers | Increased availability of salty products                   |                                                                                                                       | <b>Purchases of unregulated products</b>    |
|                                                                     |                                                                                           | Increase in production/sales of low or no alcoholic drinks |                                                                                                                       |                                             |
| Durability of interventions                                         | Retailers support interventions                                                           | Volume-based price promotion restrictions                  | Wider political landscape (e.g., Brexit) other burdensome policies (e.g., plastic tax, covid)                         |                                             |
| Interact with other aspects of DPH policy                           |                                                                                           | Location-based price promotion restrictions                | Volume and location price policies                                                                                    |                                             |
| Location based promotions                                           |                                                                                           | Other restrictions warranted                               | Unnecessarily complicated landscape of policies to meet the same goal = costly                                        |                                             |
| Covid-19 raised awareness                                           |                                                                                           | Reinforces reformulation as 'solution'                     | Potential for a level playing field (if clear guidance)                                                               | <b>Regulatory and political landscape</b>   |
| Current events in public health                                     |                                                                                           | Tax breaks/ad subsidy for SMEs producing healthy foods (?) | Insufficient warning to respond                                                                                       |                                             |
| Volume based promotions restrictions                                |                                                                                           |                                                            | Difficult to implement e.g., differences in affected categories                                                       |                                             |
|                                                                     |                                                                                           |                                                            | Packaged products not able to go at the front of store based on conditions for restrictions (packaged/HFSS/product in |                                             |

| Workshop 1 (non-industry)                                                | Workshop 2 (non-industry)                                      | Workshop 3 (non-industry)                                        | Workshop 4 (industry)                                                                       | Final map                        |
|--------------------------------------------------------------------------|----------------------------------------------------------------|------------------------------------------------------------------|---------------------------------------------------------------------------------------------|----------------------------------|
|                                                                          |                                                                |                                                                  | scope) - may relate to available nutritional info)                                          |                                  |
| Legal precedent                                                          | Influences implementation of other interventions               | Influences capacity to make future policies for HFSS             |                                                                                             | <b>Regulatory precedent</b>      |
| Decision norming (more regs seem possible)                               |                                                                | Confusion for future policies for HFSS/loss of objectivity       |                                                                                             |                                  |
| Empower policymakers                                                     |                                                                | Increase in government sanctioned digital verification           |                                                                                             |                                  |
|                                                                          |                                                                | Reduced risk of various NCDs                                     |                                                                                             | <b>Risk of diet-related NCDs</b> |
| Fewer social connotations around food                                    | Change in social norms around food                             | Influences social norms e.g., social cooling                     |                                                                                             | <b>Social norms around food</b>  |
| Changes in social norms                                                  | Family dynamics, individual dynamics                           | Reduction in normalisation of HFSS                               |                                                                                             |                                  |
| Change in engagement with foods                                          |                                                                | Limits changes to food norms                                     |                                                                                             |                                  |
| Associations with young people change (e.g., aspirational)               |                                                                | Greater influence on social/food norms                           |                                                                                             |                                  |
|                                                                          |                                                                |                                                                  |                                                                                             | <b>Society</b>                   |
| Changes link between food and personal identity                          | Shift towards food citizenship mindset                         |                                                                  |                                                                                             | <b>Societal shifts</b>           |
| Different retail environment                                             | Reduce consumerism mindset                                     |                                                                  |                                                                                             |                                  |
| Less time spent on social media                                          | Change in culture                                              |                                                                  |                                                                                             |                                  |
| Polarisation                                                             |                                                                |                                                                  |                                                                                             |                                  |
| Small producers meeting nutritional criteria/ambient food increase sales | Accessibility influences purchases                             | Increase in advertising from SMEs? If they can afford to compete | Companies with small portfolio of HFSS products most affected? e.g., chocolate              | <b>Changes vary by...</b>        |
| Different price sensitivity                                              | Increase in advertising among small companies (not franchises) | Sustained sales of HFSS from SMEs                                | Those already experiencing overweight may be more likely to benefit (higher base exposure?) |                                  |
| Importance of brand amplified for low-income people                      |                                                                | Effects differ by age?                                           | Disproportionately affects low-income people                                                |                                  |

| Workshop 1 (non-industry)                                                 | Workshop 2 (non-industry) | Workshop 3 (non-industry)                   | Workshop 4 (industry) | Final map |
|---------------------------------------------------------------------------|---------------------------|---------------------------------------------|-----------------------|-----------|
| Importance of brand amplified for young people                            |                           | Socioeconomic position                      |                       |           |
| Different groups more susceptible e.g., those exposed                     |                           | Adolescents more susceptible to advertising |                       |           |
| Differential effects by socioeconomic position                            |                           |                                             |                       |           |
| Baseline differences in health (socioeconomic gradient)                   |                           |                                             |                       |           |
| Reduce health inequalities                                                |                           |                                             |                       |           |
| Distinguish effects by brand strength e.g., better for established brands |                           |                                             |                       |           |

**Notes:** HFSS: high fat, salt and sugar; NCD: non-communicable disease; NPD: new product development; NPM: Nutrient Profile Model; SME: small and medium enterprises.
